# Supplementary material
Source: PubMed Central journal article supplement (PMC4247168)
Supplement: NIHMS60535-supplement-Supplementary_Tables_1-7.pdf [file NIHMS60535-supplement-Supplementary_Tables_1-7.pdf]

## Supplementary Table 1 (A)

Mutations that were only identified by CCLE in the comparison of sequencing data of 1630 genes across 568 cell lines from CCLE and COSMIC .

| Gene     | Mutation [cell line]                                                                    | Mutation [cell line]                                                | Mutation [cell line]                                                   |
|----------|-----------------------------------------------------------------------------------------|---------------------------------------------------------------------|------------------------------------------------------------------------|
| ABI1     | p.G331A [1] [A4FUK]<br>p.D508V [1] [LNCAPCLONEFGC]                                      | p.P416L [1] [HCC1954]                                               | p.G331A [1] [JHOS4]                                                    |
| ABL1     | p.Y234H [1] [639V]                                                                      | p.R13K [1] [HCC2157]                                                |                                                                        |
| ABL2     | p.R135Q [1] [LNCAPCLONEFGC]                                                             | p.Y399C [1] [NCIH1623]                                              | p.E684K [1] [SNU1040]                                                  |
| AKAP9    | p.E943G [1] [ISHIKAWAHERAKLIO02ER]<br>p.S1848C [1] [MOLM13]                             | p.Q1352E [1] [J82]<br>p.K677N [1] [NAMALWA]                         | p.R3712Q [1] [MKN7]                                                    |
| AKT1     | p.R249W [1] [DMS114]                                                                    | p.V145M [1] [SNU1040]                                               |                                                                        |
| AKT2     | p.Y273H [1] [ISHIKAWAHERAKLIO02ER]                                                      | p.G161E [1] [VMRCLCD]                                               |                                                                        |
| ALK      | p.M1478T [1] [KP3]<br>p.G129V [1] [OVTOKO]                                              | p.P236R [1] [MDAMB415]<br>p.G103R [1] [SW900]                       | p.S553A [1] [NCIH2087]                                                 |
| APC      | p.G470R [1] [CW2]<br>p.S2260N [1] [JHH1]                                                | p.S1567L [1] [HGC27]<br>p.A2V [1] [SNGM]                            | p.G2211C [1] [HT]<br>p.T2635P [1] [TT]                                 |
| ARHGEF12 | p.R993H [1] [HCT15]                                                                     | p.L1174W [1] [T98G]                                                 | p.A624V [1] [TT]                                                       |
| ARID1A   | p.D2277G [1] [MFE319]                                                                   | p.P253S [1] [SHP77]                                                 | p.Q177H [1] [SUDHL5]                                                   |
| ARNT     | p.T118A [1] [DAUDI]<br>p.P706L [1] [JHH2]<br>p.P706L [1] [SNU387]<br>p.P706L [1] [YKG1] | p.P706L [1] [HSC4]<br>p.P706L [1] [KYSE410]<br>p.P706L [1] [SNU398] | p.P706L [1] [HUCCT1]<br>p.P706L [1] [OSRC2]<br>p.R235C [1] [TGBC11TKB] |
| ASPSR1   | p.S607F [1] [MDAMB361]                                                                  | p.A95V [1] [REH]                                                    |                                                                        |
| ATF1     | p.I67F [1] [KM12]                                                                       |                                                                     |                                                                        |
| ATIC     | p.L244F [1] [BHY]                                                                       | p.K199E [1] [KOPN8]                                                 | p.K199E [1] [KYM1]                                                     |
| ATM      | p.F2265L [1] [IPC298]<br>p.K2515N [1] [PF382]                                           | p.R924W [1] [KYSE410]<br>p.D273N [1] [RD]                           | p.C107R [1] [LS411N]                                                   |
| ATRX     | p.P609A [1] [BFTC905]<br>p.S336P [1] [L1236]                                            | p.P667L [1] [HCC1143]<br>p.M2230T [1] [REH]                         | p.R1339M [1] [ISHIKAWAHERAKLIO02ER]<br>p.P609A [1] [VMCUB1]            |
| AXIN1    | p.L202V [1] [HCC1599]                                                                   | p.D495N [1] [KCL22]                                                 | p.P278L [1] [SW1783]                                                   |
| BAP1     | p.R512L [1] [CALU6]<br>p.G13D [1] [SNGM]                                                | p.R208Q [1] [CW2]                                                   | p.R417M [1] [SNGM]                                                     |
| BCL11B   | p.G207R [1] [COLO792]                                                                   | p.S97I [1] [MEG01]                                                  | p.H528N [1] [NCIH2172]                                                 |
| BCL3     | p.R216H [1] [EFO27]                                                                     | p.A209T [1] [IGROV1]                                                | p.G453D [1] [SNU1040]                                                  |
| BCL6     | p.S512N [1] [SW48]                                                                      |                                                                     |                                                                        |
| BCL9     | p.S1124P [1] [IGROV1]                                                                   | p.G434A [1] [KMS11]                                                 | p.L883P [1] [SNGM]                                                     |
| BCR      | p.E34D [1] [DB]<br>p.S381N [1] [NCIH810]<br>p.R55C [1] [SW948]                          | p.T875A [1] [LS411N]<br>p.D1106N [1] [OAW28]                        | p.R22L [1] [MIAPACA2]<br>p.D1106N [1] [ONS76]                          |

|          |                                                 |                                                |                                                 |
|----------|-------------------------------------------------|------------------------------------------------|-------------------------------------------------|
| BLM      | p.P5H [1] [MOGGUVVW]<br>p.D64V [1] [SU8686]     | p.S1209T [1] [OE33]                            | p.R818H [1] [PF382]                             |
| BMPR1A   | p.T33S [1] [SJS A1]                             | p.W271R [1] [U87MG]                            |                                                 |
| BRAF     | p.P74A [1] [MDAMB415]                           |                                                |                                                 |
| BRCA1    | p.Q687P [1] [HT]                                |                                                |                                                 |
| BRCA2    | p.D596H [1] [HT1080]<br>p.A75P [1] [NCIH1341]   | p.S3080Y [1] [HT115]<br>p.V1306G [1] [SIMA]    | p.G1529R [1] [MFE319]<br>p.P2735S [1] [UACC257] |
| BRD3     | p.G717R [1] [EFO27]<br>p.E475K [1] [SNU175]     | p.R278Q [1] [HCT15]<br>p.A478T [1] [SNU81]     | p.E496D [1] [KMS12BM]<br>p.T544N [1] [TE4]      |
| BRD4     | p.D818Y [1] [647V]<br>p.R510Q [1] [MELJUSO]     | p.E844Q [1] [CAMA1]<br>p.P904L [1] [MEWO]      | p.N852H [1] [LS123]<br>p.A751T [1] [SNGM]       |
| BRIP1    | p.S861C [1] [HCC1599]                           | p.Q944E [1] [JHH1]                             | p.P210H [1] [RPMI7951]                          |
| BUB1B    | p.E409D [1] [LN18]                              | p.E409D [1] [NCIH2452]                         | p.N268D [1] [NUGC3]                             |
| C15orf55 | p.V3F [1] [EM2]<br>p.R231H [1] [SW900]          | p.G613W [1] [IGROV1]<br>p.L1056V [1] [UACC893] | p.A1104S [1] [NCIH2122]                         |
| CARD11   | p.R891L [1] [CAL120]<br>p.E566G [1] [NCIH358]   | p.T670M [1] [CALU6]                            | p.P467S [1] [NCIH2110]                          |
| CARS     | p.A408T [1] [CMLT1]<br>p.P57L [1] [SF126]       | p.Q695R [1] [KP1N]<br>p.A555V [1] [SNU1040]    | p.L321F [1] [NB1]<br>p.L394M [1] [SW948]        |
| CBFA2T3  | p.Q267E [1] [KCL22]<br>p.A512T [1] [NCIH1975]   | p.E442K [1] [KYSE150]                          | p.R414Q [1] [KYSE180]                           |
| CBL      | p.T426A [1] [IGROV1]<br>p.V784M [1] [RL952]     | p.S854L [1] [MDAMB415]                         | p.V784L [1] [NCIH2342]                          |
| CCDC6    | p.S18N [1] [AGS]                                |                                                |                                                 |
| CCNB1IP1 | p.S251R [1] [EN]                                |                                                |                                                 |
| CCND1    | p.E122K [1] [HSC4]                              |                                                |                                                 |
| CCND3    | p.I290K [1] [A4FUK]<br>p.I290T [1] [SUDHL10]    | p.I290T [1] [DOHH2]                            | p.P284L [1] [ST486]                             |
| CDH1     | p.A298T [1] [CW2]                               | p.P94T [1] [LNCAPCLONEFGC]                     |                                                 |
| CDH11    | p.L630H [1] [IGROV1]<br>p.D790E [1] [RERFLCSQ1] | p.H161Y [1] [L363]                             | p.D794E [1] [MDAMB415]                          |
| CDK12    | p.P250H [1] [HCT116]                            |                                                |                                                 |
| CDK4     | p.K22Q [1] [ES2]                                | p.P110L [1] [LNCAPCLONEFGC]                    |                                                 |
| CDKN2A   | p.P135L [1] [HSC4]<br>p.S21T [1] [OVCAR4]       | p.R128S [1] [LXF289]                           | p.R161L [1] [NAMALWA]                           |
| CDKN2C   | p.L107V [1] [SH4]                               |                                                |                                                 |
| CDX2     | p.K248E [1] [AM38]<br>p.L201Q [1] [RPMI8226]    | p.V306M [1] [MHHNB11]                          | p.V321 [1] [NCIH650]                            |

|        |                                                                                                                  |                                                                                                   |                                                                                                |
|--------|------------------------------------------------------------------------------------------------------------------|---------------------------------------------------------------------------------------------------|------------------------------------------------------------------------------------------------|
| CHEK2  | p.L269F [1] [NALM6]                                                                                              |                                                                                                   |                                                                                                |
| CIC    | p.N702S [1] [KS1]<br>p.R181W [1] [SNGM]                                                                          | p.S694C [1] [LN229]<br>p.P1102L [1] [SNU1040]                                                     | p.A1521T [1] [LOVO]<br>p.N702S [1] [TE5]                                                       |
| CIITA  | p.H239Y [1] [CA46]                                                                                               |                                                                                                   |                                                                                                |
| CLTC   | p.Q1087H [1] [KYSE410]                                                                                           |                                                                                                   |                                                                                                |
| CLTCL1 | p.A1306S [1] [DETROIT562]<br>p.C151R [1] [ISHIKAWAHERAKLIO02ER]<br>p.M104I [1] [REH]                             | p.T103N [1] [HCC2157]<br>p.L1527R [1] [LOUCY]<br>p.A1214T [1] [SNU175]                            | p.E124K [1] [HCC2218]<br>p.V1401I [1] [MHHNB11]                                                |
| COL1A1 | p.N324H [1] [CALU3]                                                                                              | p.F1463L [1] [HCC1954]                                                                            | p.A723T [1] [NCIH211]                                                                          |
| CREBBP | p.S1598G [1] [ESS1]<br>p.R2194Q [1] [LS411N]<br>p.P1952L [1] [OV56]<br>p.T244M [1] [SNGM]<br>p.Q2196L [1] [YH13] | p.P1952L [1] [HT115]<br>p.W1472C [1] [NCIH1703]<br>p.S1432P [1] [PF382]<br>p.R1091H [1] [SNU1040] | p.R1664C [1] [KM12]<br>p.H67R [1] [NCIH2009]<br>p.N1813D [1] [SKMEL2]<br>p.P2237T [1] [SNU175] |
| CTNNB1 | p.R661Q [1] [639V]                                                                                               |                                                                                                   |                                                                                                |
| CYLD   | p.W16R [1] [SNGM]                                                                                                |                                                                                                   |                                                                                                |
| DAXX   | p.R717W [1] [42MGBA]                                                                                             |                                                                                                   |                                                                                                |
| DDX10  | p.G578A [1] [769P]                                                                                               | p.N579S [1] [EB2]                                                                                 |                                                                                                |
| DDX6   | p.V406A [1] [HCT15]                                                                                              | p.I209V [1] [S117]                                                                                |                                                                                                |
| EGFR   | p.Q71L [1] [HCC33]<br>p.E282K [1] [NCIH747]                                                                      | p.R973Q [1] [ISHIKAWAHERAKLIO02ER]<br>p.L815F [1] [RS411]                                         | p.A755D [1] [LOUNH91]<br>p.R98Q [1] [SUDHL1]                                                   |
| ELF4   | p.E303K [1] [HCC78]                                                                                              |                                                                                                   |                                                                                                |
| ELL    | p.R316C [1] [CL34]                                                                                               | p.S319L [1] [CW2]                                                                                 |                                                                                                |
| ELN    | p.G356S [1] [639V]<br>p.G216V [1] [LOUNH91]                                                                      | p.K107N [1] [BT549]                                                                               | p.G693R [1] [HCC1428]                                                                          |
| EML4   | p.D564N [1] [LOUCY]                                                                                              | p.T579K [1] [TE1]                                                                                 |                                                                                                |
| EP300  | p.P595S [1] [EFO27]<br>p.L2393V [1] [NB4]<br>p.R2308H [1] [RL952]                                                | p.P888S [1] [HCC2218]<br>p.A2251T [1] [NCIH2228]                                                  | p.G1778W [1] [LNCAPCLONEFGC]<br>p.E999Q [1] [OVCAR4]                                           |
| EPS15  | p.D705N [1] [EN]                                                                                                 |                                                                                                   |                                                                                                |
| ERBB2  | p.R896H [1] [MFE319]                                                                                             |                                                                                                   |                                                                                                |
| ERCC2  | p.E748K [1] [UACC812]                                                                                            |                                                                                                   |                                                                                                |
| ERCC3  | p.L100F [1] [KARPAS620]                                                                                          |                                                                                                   |                                                                                                |
| ERCC4  | p.K820E [1] [HCT15]                                                                                              | p.R463K [1] [OVISE]                                                                               |                                                                                                |
| ERCC5  | p.F1270L [1] [HCC1569]                                                                                           | p.L1023I [1] [LNCAPCLONEFGC]                                                                      | p.E853K [1] [NCIH1568]                                                                         |
| ETV1   | p.L283M [1] [ISHIKAWAHERAKLIO02ER]                                                                               |                                                                                                   |                                                                                                |
| EXT1   | p.K4R [1] [COLO829]                                                                                              | p.A486V [1] [NB1]                                                                                 | p.R325Q [1] [TGBC11TKB]                                                                        |
| EXT2   | p.I748V [1] [LXF289]                                                                                             | p.I748V [1] [MOLT13]                                                                              | p.T122M [1] [OPM2]                                                                             |

|        |                                                                     |                                                                            |                                                           |
|--------|---------------------------------------------------------------------|----------------------------------------------------------------------------|-----------------------------------------------------------|
|        | p.T122M [1] [PC14]                                                  |                                                                            |                                                           |
| FANCA  | p.P759S [1] [MEWO]                                                  | p.M569T [1] [PF382]                                                        |                                                           |
| FANCC  | p.E218K [1] [MDAMB415]                                              |                                                                            |                                                           |
| FANCD2 | p.P87L [1] [OV56]                                                   | p.L700R [1] [SNGM]                                                         |                                                           |
| FANCE  | p.G170W [1] [JHH7]                                                  | p.G340R [1] [NCIH716]                                                      | p.L331V [1] [PSN1]                                        |
| FANCF  | p.N244D [1] [PF382]                                                 |                                                                            |                                                           |
| FANCG  | p.S302I [1] [NCIH1437]                                              |                                                                            |                                                           |
| FEV    | p.Q136K [1] [NB1]                                                   |                                                                            |                                                           |
| FGFR1  | p.R424H [1] [HARA]<br>p.V102I [1] [JEKO1]<br>p.V102I [1] [NB1]      | p.S125L [1] [HCC1395]<br>p.R78H [1] [LNCAPCLONEFGC]<br>p.V102I [1] [NUGC3] | p.T79A [1] [ISHIKAWAHERAKLIO02ER]<br>p.V116I [1] [LS411N] |
| FGFR2  | p.I643T [1] [A498]<br>p.P814T [1] [PSN1]                            | p.C9S [1] [A498]<br>p.C809Y [1] [RCHACV]                                   | p.G89V [1] [CAL12T]<br>p.P187S [1] [SNU1040]              |
| FGFR3  | p.V790M [1] [ES2]                                                   | p.V306I [1] [SNGM]                                                         | p.S773F [1] [SW780]                                       |
| FHIT   | p.M135T [1] [KURAMOCHI]                                             |                                                                            |                                                           |
| FIP1L1 | p.R481H [1] [IM95]                                                  | p.A455V [1] [SF126]                                                        |                                                           |
| FLT3   | p.Y376C [1] [22RV1]                                                 |                                                                            |                                                           |
| FUS    | p.A348T [1] [PF382]                                                 |                                                                            |                                                           |
| GAS7   | p.A264S [1] [DU145]                                                 |                                                                            |                                                           |
| GATA1  | p.P395L [1] [CORL23]                                                | p.R317W [1] [SW1783]                                                       |                                                           |
| GATA2  | p.G167S [1] [CMK]<br>p.S464R [1] [NCIH1781]<br>p.G468S [1] [SUPHD1] | p.P240S [1] [HCC1569]<br>p.A411V [1] [PF382]                               | p.G273R [1] [MELJUSO]<br>p.S261N [1] [SNU175]             |
| GNAS   | p.R632H [1] [JHH1]                                                  | p.R217C [1] [SKMEL1]                                                       | p.E747K [1] [SNU1040]                                     |
| GOLGA5 | p.Q557K [1] [HCC56]<br>p.L556F [1] [LK2]                            | p.L556F [1] [HUCCT1]                                                       | p.L556F [1] [KCL22]                                       |
| GOPC   | p.A243T [1] [SNU1040]                                               |                                                                            |                                                           |
| GPC3   | p.P135T [1] [LNCAPCLONEFGC]                                         |                                                                            |                                                           |
| GPHN   | p.I53V [1] [UACC812]                                                |                                                                            |                                                           |
| HIP1   | p.L85M [1] [MFE296]                                                 | p.G852R [1] [NUGC4]                                                        |                                                           |
| HLF    | p.D79N [1] [SNU1040]                                                |                                                                            |                                                           |
| HMGA1  | p.A70D [1] [LNCAPCLONEFGC]                                          |                                                                            |                                                           |
| HOXC11 | p.R71L [1] [SW48]                                                   |                                                                            |                                                           |
| HOXC13 | p.A159T [1] [HCT15]                                                 |                                                                            |                                                           |
| HOXD13 | p.A174T [1] [HT1080]<br>p.N293K [1] [NCIH2342]                      | p.T111M [1] [IM95]                                                         | p.A157T [1] [NALM6]                                       |

|          |                                                                            |                                                                   |                                               |
|----------|----------------------------------------------------------------------------|-------------------------------------------------------------------|-----------------------------------------------|
| IDH1     | p.F32V [1] [ES2]                                                           |                                                                   |                                               |
| IDH2     | p.Q95R [1] [ISHIKAWAHERAKLIO02ER]                                          | p.H358R [1] [SW1088]                                              |                                               |
| IKZF1    | p.S364L [1] [A2780]                                                        | p.M518T [1] [LS411N]                                              | p.R360H [1] [REH]                             |
| IL21R    | p.R139C [1] [CADOES1]                                                      | p.R139C [1] [KP4]                                                 | p.R201W [1] [TT]                              |
| IL6ST    | p.R345K [1] [639V]                                                         | p.K76E [1] [SKHEP1]                                               |                                               |
| IRF4     | p.S238C [1] [HCT15]                                                        |                                                                   |                                               |
| ITK      | p.R448H [1] [IGROV1]<br>p.Y422H [1] [SNU1040]                              | p.G271E [1] [KYSE520]                                             | p.L104V [1] [NCIH1568]                        |
| JAK1     | p.D82A [1] [EN]                                                            | p.I62V [1] [NCIH1915]                                             | p.L166S [1] [SNU1040]                         |
| JAK2     | p.V80M [1] [LS411N]                                                        |                                                                   |                                               |
| JAK3     | p.Q228R [1] [A172]                                                         |                                                                   |                                               |
| KDM5A    | p.S1066C [1] [KM12]<br>p.R719C [1] [SNU1040]                               | p.R1282C [1] [KYSE520]<br>p.K1168R [1] [T98G]                     | p.R606M [1] [NB1]                             |
| KDR      | p.V1041L [1] [BECKER]<br>p.E685G [1] [MOLT16]                              | p.G333V [1] [HS746T]<br>p.I915V [1] [SKMEL30]                     | p.A1065T [1] [LNCAPCLONEFGC]                  |
| KIAA1549 | p.P916H [1] [HCT15]<br>p.Q1164K [1] [SCABER]                               | p.Q661R [1] [IGROV1]                                              | p.V1314M [1] [RKO]                            |
| KRAS     | p.G12D [1] [639V]                                                          | p.I171M [1] [SUDHL10]                                             |                                               |
| KTN1     | p.Q1179H [1] [2313287]                                                     | p.I574V [1] [NCIH446]                                             | p.R627C [1] [RCHACV]                          |
| LCK      | p.R139Q [1] [KOPN8]<br>p.Q328R [1] [SNUC5]                                 | p.A143S [1] [LNCAPCLONEFGC]                                       | p.A426T [1] [REH]                             |
| LIFR     | p.N1096K [1] [BT20]<br>p.S239N [1] [LNCAPCLONEFGC]<br>p.I83V [1] [NCIH211] | p.D16N [1] [EFO21]<br>p.N1096K [1] [ML1]<br>p.W172C [1] [SNU1040] | p.I719L [1] [IGROV1]<br>p.S151C [1] [NCIH209] |
| LMO2     | p.K77R [1] [KCL22]                                                         |                                                                   |                                               |
| LPP      | p.P207L [1] [CGTHW1]<br>p.R268W [1] [NCIH2126]                             | p.R415H [1] [HCC1143]                                             | p.H590Y [1] [ISHIKAWAHERAKLIO02ER]            |
| LYL1     | p.R223G [1] [TT2609C02]                                                    |                                                                   |                                               |
| MAF      | p.A251T [1] [YAPC]                                                         |                                                                   |                                               |
| MAFB     | p.A130T [1] [CL34]                                                         | p.A176V [1] [NCIH1792]                                            | p.P157L [1] [SNU1040]                         |
| MAML2    | p.P370L [1] [GCT]<br>p.M857V [1] [SKMEL1]                                  | p.Q628L [1] [GI1]                                                 | p.T1074M [1] [S117]                           |
| MAP2K1   | p.V211A [1] [PF382]                                                        |                                                                   |                                               |
| MAP2K4   | p.R145Q [1] [ISHIKAWAHERAKLIO02ER]                                         |                                                                   |                                               |
| MDM2     | p.S4R [1] [NCIH2122]                                                       |                                                                   |                                               |
| MDM4     | p.E428K [1] [ISHIKAWAHERAKLIO02ER]                                         | p.I19M [1] [LP1]                                                  |                                               |

|        |                                                                                                                                                |                                                                                                                                       |                                                                                                                     |
|--------|------------------------------------------------------------------------------------------------------------------------------------------------|---------------------------------------------------------------------------------------------------------------------------------------|---------------------------------------------------------------------------------------------------------------------|
| MEN1   | p.Y232H [1] [22RV1]<br>p.G508D [1] [ONS76]                                                                                                     | p.R485Q [1] [LOVO]                                                                                                                    | p.A242V [1] [NCIH209]                                                                                               |
| MET    | p.G24E [1] [TE441T]                                                                                                                            |                                                                                                                                       |                                                                                                                     |
| MITF   | p.Q305H [1] [MM1S]                                                                                                                             |                                                                                                                                       |                                                                                                                     |
| MKL1   | p.V441G [1] [5637]<br>p.R460L [1] [NCIH1793]                                                                                                   | p.N194S [1] [HCC1954]<br>p.S439C [1] [SH4]                                                                                            | p.G473R [1] [LS411N]                                                                                                |
| MLH1   | p.D132H [1] [HCC1428]                                                                                                                          | p.R217C [1] [RERFLCMS]                                                                                                                |                                                                                                                     |
| MLL    | p.V1433G [1] [EB2]<br>p.G3131S [1] [IM95]<br>p.G3131S [1] [NB1]<br>p.A3425V [1] [TGBC11TKB]                                                    | p.G3131S [1] [EBC1]<br>p.S2258G [1] [ISHIKAWAHERAKLIO02ER]<br>p.D3924Y [1] [NB1]<br>p.S759N [1] [UACC893]                             | p.H3558R [1] [EN]<br>p.G3131S [1] [KURAMOCHI]<br>p.G3131S [1] [TE6]<br>p.I1827M [1] [UACC893]                       |
| MLL3   | p.G892E [1] [CAK11]<br>p.T831A [1] [HS766T]<br>p.E3716K [1] [MDAMB415]<br>p.E3406K [1] [NCIH209]<br>p.R4595C [1] [RS411]<br>p.G892E [1] [T98G] | p.I862L [1] [COLO829]<br>p.R4725M [1] [ISHIKAWAHERAKLIO02ER]<br>p.S888T [1] [NCIH1703]<br>p.I823T [1] [OVK18]<br>p.P860S [1] [SNU175] | p.P3082L [1] [HCC33]<br>p.T2605R [1] [LS411N]<br>p.D597H [1] [NCIH1781]<br>p.E3384G [1] [REH]<br>p.G892E [1] [T47D] |
| MLLT1  | p.R403H [1] [DND41]                                                                                                                            | p.A244V [1] [SNU1040]                                                                                                                 |                                                                                                                     |
| MLLT10 | p.G483A [1] [MDAMB415]                                                                                                                         | p.D213E [1] [S117]                                                                                                                    | p.S842F [1] [SKNSH]                                                                                                 |
| MLLT4  | p.D1733N [1] [HT1376]<br>p.P501L [1] [NCIH1436]<br>p.D1733N [1] [T47D]                                                                         | p.F744V [1] [ISHIKAWAHERAKLIO02ER]<br>p.C964Y [1] [REH]                                                                               | p.L930P [1] [ISHIKAWAHERAKLIO02ER]<br>p.E1749A [1] [RL952]                                                          |
| MLLT6  | p.F532V [1] [ISHIKAWAHERAKLIO02ER]<br>p.C145Y [1] [MOLT13]                                                                                     | p.R568Q [1] [ISHIKAWAHERAKLIO02ER]<br>p.R475H [1] [NALM6]                                                                             | p.S281F [1] [L540]<br>p.S822C [1] [RERFLCKJ]                                                                        |
| MN1    | p.P594L [1] [DAUDI]<br>p.L570Q [1] [MOGGUVW]<br>p.G608C [1] [NCIH650]<br>p.R564W [1] [SNU1040]<br>p.P668L [1] [SW1088]                         | p.P121L [1] [JHH7]<br>p.V719L [1] [MPP89]<br>p.G1131D [1] [NCIH716]<br>p.A554V [1] [SNU1040]                                          | p.M557V [1] [LOVO]<br>p.P192L [1] [NALM6]<br>p.G840R [1] [RL952]<br>p.P488L [1] [SNU1040]                           |
| MPL    | p.R537Q [1] [RL952]                                                                                                                            |                                                                                                                                       |                                                                                                                     |
| MSH2   | p.F19L [1] [NCIH596]                                                                                                                           | p.Q419K [1] [SNU283]                                                                                                                  | p.Q419K [1] [TYKNU]                                                                                                 |
| MSH6   | p.V800L [1] [COLO829]<br>p.E221D [1] [L363]<br>p.T1205I [1] [SNU1040]                                                                          | p.T1189I [1] [HCT15]<br>p.L1081F [1] [NCIH1781]<br>p.E221D [1] [SW620]                                                                | p.I1183T [1] [ISHIKAWAHERAKLIO02ER]<br>p.R1321G [1] [NCIH209]                                                       |
| MSI2   | p.Y129H [1] [EN]                                                                                                                               |                                                                                                                                       |                                                                                                                     |
| MSN    | p.V188F [1] [RL]                                                                                                                               |                                                                                                                                       |                                                                                                                     |
| MYB    | p.L300F [1] [HCC827]                                                                                                                           |                                                                                                                                       |                                                                                                                     |
| MYC    | p.E54D [1] [RAJI]                                                                                                                              |                                                                                                                                       |                                                                                                                     |
| MYCL1  | p.A125S [1] [NCIH2110]                                                                                                                         | p.M95I [1] [NCIH650]                                                                                                                  |                                                                                                                     |
| MYD88  | p.S219C [1] [SUDHL6]                                                                                                                           |                                                                                                                                       |                                                                                                                     |
| MYH11  | p.V1837I [1] [DAUDI]<br>p.L763P [1] [MOLT16]<br>p.M1363L [1] [PF382]                                                                           | p.R1740H [1] [DND41]<br>p.R1869H [1] [NCIH1694]<br>p.T1553M [1] [SJSA1]                                                               | p.D1382N [1] [MDAMB453]<br>p.S650Y [1] [NCIH1703]<br>p.Q193E [1] [TE9]                                              |

|        |                                                                                                                                                                                                                                                                                                                                                                                                                                                                                                |                                                                                                                                                                                                                                                                                                                                                                                                                                                                           |                                                                                                                                                                                                                                                                                                                                                                                                                                                                     |
|--------|------------------------------------------------------------------------------------------------------------------------------------------------------------------------------------------------------------------------------------------------------------------------------------------------------------------------------------------------------------------------------------------------------------------------------------------------------------------------------------------------|---------------------------------------------------------------------------------------------------------------------------------------------------------------------------------------------------------------------------------------------------------------------------------------------------------------------------------------------------------------------------------------------------------------------------------------------------------------------------|---------------------------------------------------------------------------------------------------------------------------------------------------------------------------------------------------------------------------------------------------------------------------------------------------------------------------------------------------------------------------------------------------------------------------------------------------------------------|
| MYH9   | p.N1787S [1] [LNCAPCLONEFGC]<br>p.R755H [1] [PF382]<br>p.K14E [1] [SNU1040]                                                                                                                                                                                                                                                                                                                                                                                                                    | p.A27V [1] [LNCAPCLONEFGC]<br>p.R1661H [1] [RKO]                                                                                                                                                                                                                                                                                                                                                                                                                          | p.G179D [1] [LS180]<br>p.E530K [1] [SNGM]                                                                                                                                                                                                                                                                                                                                                                                                                           |
| NACA   | p.K1648R [1] [5637]<br>p.K1759E [1] [A673]<br>p.A1246V [1] [CMLT1]<br>p.N1724T [1] [CW2]<br>p.I1716V [1] [EPLC272H]<br>p.P1818S [1] [HCC1569]<br>p.T902I [1] [HCT15]<br>p.P471L [1] [HT115]<br>p.P1226L [1] [JM1]<br>p.P1628S [1] [KCL22]<br>p.T1058R [1] [KP2]<br>p.P655S [1] [LS411N]<br>p.T552A [1] [MFE319]<br>p.P1328L [1] [NCIH196]<br>p.V371M [1] [NCIH526]<br>p.K1568R [1] [RERFLCMS]<br>p.P1329H [1] [SKMEL2]<br>p.V34I [1] [SNU1040]<br>p.G952E [1] [SUPHD1]<br>p.P1053S [1] [WM115] | p.S1757P [1] [A253]<br>p.T1882R [1] [BFTC905]<br>p.P1503L [1] [COLO792]<br>p.A1171V [1] [CW2]<br>p.A486V [1] [ESS1]<br>p.V1858I [1] [HCT116]<br>p.L158H [1] [HDMYZ]<br>p.P1082H [1] [HUH7]<br>p.P1320Q [1] [KASUMI1]<br>p.P1029S [1] [KCL22]<br>p.P649S [1] [KYSE180]<br>p.P1808L [1] [MEWO]<br>p.P426T [1] [MOLT16]<br>p.G1300V [1] [NCIH2087]<br>p.P1320A [1] [OAW28]<br>p.S1650C [1] [RL952]<br>p.P1772R [1] [SNU1040]<br>p.S713P [1] [SNU175]<br>p.T500I [1] [SW1710] | p.P649S [1] [A375]<br>p.P1225L [1] [CAS1]<br>p.P1343S [1] [COLO792]<br>p.H215L [1] [DU145]<br>p.P131L [1] [G361]<br>p.W961L [1] [HCT15]<br>p.P561S [1] [HT115]<br>p.S617L [1] [JUN3]<br>p.V1642E [1] [KCL22]<br>p.P583T [1] [KNS42]<br>p.A1833T [1] [LCLC103H]<br>p.P1622L [1] [MFE319]<br>p.G816C [1] [NCIH1944]<br>p.S1236P [1] [NCIH2444]<br>p.G1300V [1] [PANC1005]<br>p.P48S [1] [RT112]<br>p.P1465S [1] [SNU1040]<br>p.L415I [1] [SNU81]<br>p.I1716V [1] [TT] |
| NCOA1  | p.E905K [1] [CALU6]<br>p.N1332S [1] [T98G]                                                                                                                                                                                                                                                                                                                                                                                                                                                     | p.S1373P [1] [HCC1954]                                                                                                                                                                                                                                                                                                                                                                                                                                                    | p.E587D [1] [NCIH82]                                                                                                                                                                                                                                                                                                                                                                                                                                                |
| NCOA2  | p.N412T [1] [CADOES1]<br>p.M1452V [1] [SW1088]                                                                                                                                                                                                                                                                                                                                                                                                                                                 | p.T390P [1] [HS746T]                                                                                                                                                                                                                                                                                                                                                                                                                                                      | p.N412T [1] [KYSE180]                                                                                                                                                                                                                                                                                                                                                                                                                                               |
| NCOA4  | p.Q21K [1] [KALS1]                                                                                                                                                                                                                                                                                                                                                                                                                                                                             |                                                                                                                                                                                                                                                                                                                                                                                                                                                                           |                                                                                                                                                                                                                                                                                                                                                                                                                                                                     |
| NF1    | p.I2058V [1] [DB]<br>p.E2231D [1] [ISHIKAWAHERAKLIO02ER]<br>p.Q1033R [1] [JHH6]<br>p.T2805I [1] [LS411N]<br>p.Q1033R [1] [UACC893]                                                                                                                                                                                                                                                                                                                                                             | p.Q1033R [1] [FUOV1]<br>p.Q1033R [1] [JHH2]<br>p.F1037C [1] [JHH6]<br>p.Q1033R [1] [MDAMB468]<br>p.F1037C [1] [UACC893]                                                                                                                                                                                                                                                                                                                                                   | p.F1037C [1] [FUOV1]<br>p.F1037C [1] [JHH2]<br>p.K798R [1] [JHOS2]<br>p.P1951Q [1] [MHHS1]                                                                                                                                                                                                                                                                                                                                                                          |
| NF2    | p.E392K [1] [IGROV1]                                                                                                                                                                                                                                                                                                                                                                                                                                                                           | p.T480M [1] [P31FUJ]                                                                                                                                                                                                                                                                                                                                                                                                                                                      |                                                                                                                                                                                                                                                                                                                                                                                                                                                                     |
| NFKB2  | p.D865N [1] [BT474]                                                                                                                                                                                                                                                                                                                                                                                                                                                                            | p.S814G [1] [DND41]                                                                                                                                                                                                                                                                                                                                                                                                                                                       | p.A867V [1] [TOV21G]                                                                                                                                                                                                                                                                                                                                                                                                                                                |
| NIN    | p.G1414V [1] [CMLT1]<br>p.T1465I [1] [KCL22]<br>p.T22M [1] [SCC9]<br>p.S1965C [1] [THP1]                                                                                                                                                                                                                                                                                                                                                                                                       | p.D520H [1] [EVSAT]<br>p.N1063T [1] [KP1N]<br>p.R2052G [1] [SKUT1]                                                                                                                                                                                                                                                                                                                                                                                                        | p.Q1811K [1] [HCC78]<br>p.D1480Y [1] [NCIH2087]<br>p.D35N [1] [SNU1040]                                                                                                                                                                                                                                                                                                                                                                                             |
| NKX2-1 | p.G270E [1] [DETROIT562]<br>p.F41L [1] [PANC0813]                                                                                                                                                                                                                                                                                                                                                                                                                                              | p.Y204C [1] [IGROV1]                                                                                                                                                                                                                                                                                                                                                                                                                                                      | p.A289E [1] [NCIH1869]                                                                                                                                                                                                                                                                                                                                                                                                                                              |
| NONO   | p.Q25H [1] [REH]                                                                                                                                                                                                                                                                                                                                                                                                                                                                               |                                                                                                                                                                                                                                                                                                                                                                                                                                                                           |                                                                                                                                                                                                                                                                                                                                                                                                                                                                     |
| NOTCH1 | p.G653C [1] [639V]<br>p.L2457V [1] [ALLSIL]<br>p.Q184R [1] [HUH7]<br>p.T865N [1] [LNCAPCLONEFGC]<br>p.P284L [1] [NCIH727]<br>p.R1586C [1] [RKN]<br>p.C227Y [1] [SKUT1]                                                                                                                                                                                                                                                                                                                         | p.C600S [1] [639V]<br>p.L1593P [1] [ALLSIL]<br>p.Q1134R [1] [KNS62]<br>p.Q1193H [1] [NCIH209]<br>p.E383K [1] [P121CHIKAWA]<br>p.G881S [1] [S117]<br>p.P1442L [1] [SNU1040]                                                                                                                                                                                                                                                                                                | p.A2452V [1] [A2780]<br>p.E851G [1] [HCC44]<br>p.G1360S [1] [KYSE180]<br>p.T1883I [1] [NCIH23]<br>p.L1574P [1] [PF382]<br>p.R2549C [1] [SKMEL30]                                                                                                                                                                                                                                                                                                                    |
| NOTCH2 | p.G313D [1] [639V]<br>p.A2191T [1] [SNU1040]                                                                                                                                                                                                                                                                                                                                                                                                                                                   | p.P365L [1] [DU145]<br>p.R2105W [1] [U87MG]                                                                                                                                                                                                                                                                                                                                                                                                                               | p.S1500R [1] [RL952]                                                                                                                                                                                                                                                                                                                                                                                                                                                |

|          |                                                                                                                          |                                                                                            |                                                                                                                |
|----------|--------------------------------------------------------------------------------------------------------------------------|--------------------------------------------------------------------------------------------|----------------------------------------------------------------------------------------------------------------|
| NPM1     | p.I138V [1] [639V]<br>p.A186V [1] [TYKNU]                                                                                | p.K141R [1] [ISHIKAWAHERAKLIO02ER]                                                         | p.R277W [1] [SNU1040]                                                                                          |
| NR4A3    | p.A17T [1] [SNU398]                                                                                                      |                                                                                            |                                                                                                                |
| NRAS     | p.Q61K [1] [SKNSH]                                                                                                       |                                                                                            |                                                                                                                |
| NSD1     | p.R1188S [1] [G401]                                                                                                      | p.T1063A [1] [OVK18]                                                                       |                                                                                                                |
| NTRK1    | p.V170A [1] [EVSAT]<br>p.D738N [1] [SNU398]<br>p.P387L [1] [UACC257]                                                     | p.R452C [1] [HCC1599]<br>p.L26P [1] [SNU407]                                               | p.V294L [1] [NCIH2141]<br>p.D793A [1] [SNU449]                                                                 |
| NTRK3    | p.G473C [1] [NCIH2171]<br>p.E158K [1] [SNU1040]                                                                          | p.L5F [1] [NCIH520]                                                                        | p.Y353H [1] [PF382]                                                                                            |
| NUMA1    | p.S2047L [1] [CHL1]<br>p.S2047L [1] [NCIH1734]                                                                           | p.R1743C [1] [CW2]<br>p.Q565K [1] [SW1417]                                                 | p.Q1170P [1] [MC116]                                                                                           |
| NUP214   | p.G1983W [1] [CAL12T]<br>p.G1983W [1] [NCIH1836]<br>p.G1983W [1] [SW1088]                                                | p.G1983W [1] [COLO679]<br>p.G1983W [1] [NCIH2030]<br>p.G1983W [1] [VMRCRCZ]                | p.G1983W [1] [NCIH1563]<br>p.G1983W [1] [SCABER]<br>p.S579L [1] [ZR7530]                                       |
| NUP98    | p.M1122T [1] [639V]<br>p.E1303G [1] [MHHCALL4]                                                                           | p.R1733H [1] [FU97]                                                                        | p.E1303G [1] [KARPAS299]                                                                                       |
| OMD      | p.Y51C [1] [REH]                                                                                                         |                                                                                            |                                                                                                                |
| PAFAH1B2 | p.S64P [1] [SNU407]                                                                                                      |                                                                                            |                                                                                                                |
| PALB2    | p.T787I [1] [IGROV1]                                                                                                     |                                                                                            |                                                                                                                |
| PAX3     | p.I191M [1] [MDAMB415]                                                                                                   |                                                                                            |                                                                                                                |
| PAX5     | p.L33V [1] [639V]                                                                                                        | p.R11Q [1] [IGROV1]                                                                        | p.E4D [1] [TE9]                                                                                                |
| PAX7     | p.Q91H [1] [HCT15]                                                                                                       | p.R158H [1] [REH]                                                                          |                                                                                                                |
| PAX8     | p.R64K [1] [LNCAPCLONEFGC]                                                                                               | p.H377Y [1] [OVTOKO]                                                                       |                                                                                                                |
| PBX1     | p.I204M [1] [MOLT16]                                                                                                     |                                                                                            |                                                                                                                |
| PCM1     | p.D27E [1] [A704]<br>p.E920D [1] [HCC1143]<br>p.A262T [1] [KURAMOCHI]<br>p.Q1864R [1] [NCIH2126]<br>p.N427T [1] [SW1463] | p.A262T [1] [ABC1]<br>p.Y1176C [1] [HCC1599]<br>p.A262T [1] [KYM1]<br>p.A262T [1] [OVKATE] | p.Q1864R [1] [CAL78]<br>p.V1514A [1] [ISHIKAWAHERAKLIO02ER]<br>p.D1842H [1] [NCIH2030]<br>p.T1279R [1] [SJSA1] |
| PCSK7    | p.N200S [1] [LNCAPCLONEFGC]                                                                                              |                                                                                            |                                                                                                                |
| PDE4DIP  | p.H2179R [1] [2313287]<br>p.A2053G [1] [NCIH526]<br>p.P1675T [1] [SW1710]                                                | p.G2148V [1] [647V]<br>p.A1183V [1] [SNGM]                                                 | p.S2249F [1] [JHOS2]<br>p.D33Y [1] [SNU81]                                                                     |
| PDGFB    | p.R129H [1] [DETROIT562]<br>p.E21A [1] [NCIH1836]                                                                        | p.Q147K [1] [HS940T]                                                                       | p.R3L [1] [LS513]                                                                                              |
| PDGFRA   | p.E93K [1] [AGS]<br>p.N232S [1] [IALM]<br>p.N232S [1] [PC14]                                                             | p.T266P [1] [ESS1]<br>p.G133E [1] [KYSE510]<br>p.N232S [1] [THP1]                          | p.S37G [1] [HT115]<br>p.G179R [1] [MM1S]                                                                       |
| PDGFRB   | p.T882I [1] [HCC1395]<br>p.T88I [1] [MOLT16]                                                                             | p.N718Y [1] [HCC38]<br>p.A168T [1] [SNU1040]                                               | p.D166G [1] [ISHIKAWAHERAKLIO02ER]<br>p.E133K [1] [SNU1040]                                                    |



|         |                                                                                              |                                                                                              |                                                                                              |
|---------|----------------------------------------------------------------------------------------------|----------------------------------------------------------------------------------------------|----------------------------------------------------------------------------------------------|
| PER1    | p.F889L [1] [BT474]<br>p.G432R [1] [HCT15]<br>p.P766L [1] [MFE319]<br>p.P871L [1] [NCIH2227] | p.S842L [1] [HCC1395]<br>p.S811F [1] [KM12]<br>p.Q896H [1] [MOLT16]<br>p.R805C [1] [SNU1040] | p.A416V [1] [HCC33]<br>p.A1108S [1] [L540]<br>p.L898F [1] [NCIH2126]<br>p.R841H [1] [SW1271] |
| PHOX2B  | p.S297L [1] [COLO792]                                                                        |                                                                                              |                                                                                              |
| PICALM  | p.P584Q [1] [SIGM5]                                                                          |                                                                                              |                                                                                              |
| PIK3R1  | p.L570P [1] [ISHIKAWAHERAKLIO02ER]                                                           |                                                                                              |                                                                                              |
| PLAG1   | p.Q350R [1] [ISHIKAWAHERAKLIO02ER]                                                           | p.P410L [1] [REH]                                                                            |                                                                                              |
| PML     | p.L713R [1] [HCT15]                                                                          | p.R284C [1] [SW48]                                                                           |                                                                                              |
| PMS1    | p.S597R [1] [IGROV1]                                                                         | p.R883C [1] [MFE319]                                                                         |                                                                                              |
| PMS2    | p.N335S [1] [CAS1]                                                                           | p.N335S [1] [CPCN]                                                                           | p.Q604R [1] [ISHIKAWAHERAKLIO02ER]                                                           |
| POU2AF1 | p.S66F [1] [HT29]                                                                            | p.R36Q [1] [SNGM]                                                                            |                                                                                              |
| POU5F1  | p.N214D [1] [TE8]                                                                            |                                                                                              |                                                                                              |
| PRCC    | p.P138R [1] [CHAGOK1]                                                                        | p.A40T [1] [OE19]                                                                            |                                                                                              |
| PRDM16  | p.T1224A [1] [22RV1]<br>p.P937A [1] [MDAMB468]                                               | p.M863V [1] [CAL51]<br>p.I807V [1] [NCIH1836]                                                | p.P937T [1] [DAUDI]<br>p.D742Y [1] [NCIH2444]                                                |
| PTEN    | p.I67K [1] [LS180]                                                                           | p.A34S [1] [MOGGUVW]                                                                         | p.R173C [1] [REH]                                                                            |
| PTPN11  | p.R278K [1] [COLO792]                                                                        | p.N275T [1] [NCIH146]                                                                        | p.T553M [1] [NCIH2227]                                                                       |
| PTPRC   | p.S951L [1] [CL11]<br>p.R953W [1] [NCIH2110]                                                 | p.P390S [1] [CW2]<br>p.R660Q [1] [SUDHL4]                                                    | p.N966K [1] [KARPAS299]                                                                      |
| RAC1    | p.V104M [1] [DEL]                                                                            | p.C18Y [1] [REH]                                                                             | p.A59T [1] [RL952]                                                                           |
| RAF1    | p.C168Y [1] [NCIH1436]                                                                       |                                                                                              |                                                                                              |
| RALGDS  | p.G145R [1] [NAMALWA]<br>p.R166H [1] [WSUDLCL2]                                              | p.A777T [1] [SHP77]                                                                          | p.V780M [1] [SNGM]                                                                           |
| RANBP17 | p.P97H [1] [CMLT1]                                                                           |                                                                                              |                                                                                              |
| RARA    | p.P318R [1] [DMS79]                                                                          | p.P172L [1] [SNU1040]                                                                        |                                                                                              |
| RB1     | p.A488V [1] [P31FUJ]                                                                         |                                                                                              |                                                                                              |
| RBM15   | p.S103F [1] [KM12]                                                                           | p.R732Q [1] [NCIH1436]                                                                       | p.T737I [1] [PF382]                                                                          |
| RECQL4  | p.E883Q [1] [5637]<br>p.S1157N [1] [NCIH1436]<br>p.Y621C [1] [PF382]                         | p.M989I [1] [EFO27]<br>p.N616S [1] [NCIH1568]<br>p.E301K [1] [RERFGC1B]                      | p.P671T [1] [KP1N]<br>p.E823K [1] [NCIH1694]<br>p.P103L [1] [SKES1]                          |
| REL     | p.R219C [1] [HCT116]<br>p.T433I [1] [RERFGC1B]                                               | p.T433I [1] [MEG01]<br>p.D42Y [1] [SNU1040]                                                  | p.T433I [1] [OVISE]                                                                          |
| RET     | p.T1038A [1] [SNU175]                                                                        |                                                                                              |                                                                                              |
| ROS1    | p.L1430M [1] [639V]<br>p.T1963S [1] [ISHIKAWAHERAKLIO02ER]<br>p.R2205I [1] [NCIH929]         | p.A1601D [1] [HCC1954]<br>p.G747V [1] [ISHIKAWAHERAKLIO02ER]<br>p.Y1353S [1] [RERFGC1B]      | p.R2096Q [1] [ISHIKAWAHERAKLIO02ER]<br>p.Y1353S [1] [JHH7]                                   |

|         |                                                 |                                               |                                               |
|---------|-------------------------------------------------|-----------------------------------------------|-----------------------------------------------|
| RPN1    | p.H238Y [1] [ML1]<br>p.L11V [1] [SUPB15]        | p.S229N [1] [NCIH1436]                        | p.R263H [1] [REH]                             |
| RUNX1   | p.M368V [1] [IM95]                              |                                               |                                               |
| SDHD    | p.S94F [1] [COLO792]                            |                                               |                                               |
| SEPT6   | p.R400C [1] [HCC827]                            |                                               |                                               |
| SH3GL1  | p.E49K [1] [BL41]                               | p.P268H [1] [ISHIKAWAHERAKLIO02ER]            | p.R245Q [1] [SNU1040]                         |
| SLC45A3 | p.S93F [1] [KYSE270]                            |                                               |                                               |
| SMARCA4 | p.Q1594R [1] [CMLT1]<br>p.P1487Q [1] [SNGM]     | p.R1323H [1] [HCC1143]<br>p.A703V [1] [SW48]  | p.R885C [1] [HCT15]                           |
| SMO     | p.S354P [1] [SNU1040]                           |                                               |                                               |
| SOX2    | p.Q34H [1] [IM95]                               | p.P289S [1] [RPMI8402]                        |                                               |
| SS18    | p.P130L [1] [LNCAPCLONEFGC]<br>p.A4G [1] [T98G] | p.S154L [1] [NCIH1563]                        | p.E15D [1] [SNU81]                            |
| SS18L1  | p.V162I [1] [2313287]                           |                                               |                                               |
| SSX1    | p.L61Q [1] [HCC1187]                            |                                               |                                               |
| SSX4    | p.Y31F [1] [NCIH211]                            |                                               |                                               |
| STAT3   | p.T545I [1] [EN]                                | p.M99K [1] [HT144]                            |                                               |
| STK11   | p.L183V [1] [SNU1040]                           |                                               |                                               |
| SUZ12   | p.Y434C [1] [NCIH1944]                          |                                               |                                               |
| TAF15   | p.G207S [1] [SNGM]                              | p.G443E [1] [SNU1040]                         |                                               |
| TAL1    | p.G269D [1] [OE21]                              |                                               |                                               |
| TCF12   | p.G331V [1] [BV173]                             | p.R673G [1] [CW2]                             | p.Q657R [1] [ISHIKAWAHERAKLIO02ER]            |
| TCL6    | p.H69P [1] [BEN]                                | p.G78R [1] [NCIH1437]                         |                                               |
| TERT    | p.S206I [1] [CW2]                               | p.D1038N [1] [REH]                            |                                               |
| TET2    | p.S911L [1] [DAUDI]<br>p.G450R [1] [OE19]       | p.L328R [1] [NCIH1573]<br>p.R144H [1] [SKNDZ] | p.L328R [1] [NCIH209]<br>p.A728D [1] [SW1088] |
| TFE3    | p.P19A [1] [SHP77]                              |                                               |                                               |
| TFEB    | p.E8K [1] [C3A]<br>p.S223N [1] [RCHACV]         | p.G371R [1] [NCIH446]                         | p.R107L [1] [NCIH661]                         |
| TFG     | p.R385H [1] [MOLT13]                            |                                               |                                               |
| THRAP3  | p.A667T [1] [HARA]                              | p.R35Q [1] [MFE319]                           |                                               |
| TLX1    | p.A266S [1] [CORL23]                            | p.G112A [1] [NCIH1838]                        |                                               |
| TLX3    | p.A236T [1] [OVISE]                             | p.R222W [1] [SNU1040]                         |                                               |
| TNFAIP3 | p.A475T [1] [HCT15]<br>p.A464T [1] [SNU1040]    | p.A545V [1] [NCIH2141]<br>p.A545V [1] [SW948] | p.R761H [1] [NCIH2171]                        |

|         |                                                                                        |                                                                                  |                                                                          |
|---------|----------------------------------------------------------------------------------------|----------------------------------------------------------------------------------|--------------------------------------------------------------------------|
| TOP1    | p.A705S [1] [LNCAPCLONEFGC]                                                            | p.T597M [1] [SNU1040]                                                            | p.E561K [1] [SUDHL6]                                                     |
| TP53    | p.R290C [1] [CMLT1]<br>p.M246V [1] [ISHIKAWAHERAKLIO02ER]<br>p.N239S [1] [PF382]       | p.R181C [1] [CMLT1]<br>p.D49H [1] [ISHIKAWAHERAKLIO02ER]<br>p.Y220C [1] [TE8]    | p.S241F [1] [HCT15]<br>p.V216L [1] [LCLC103H]                            |
| TPR     | p.T1979P [1] [AN3CA]<br>p.G2000C [1] [ISHIKAWAHERAKLIO02ER]<br>p.D1959Y [1] [MDAMB231] | p.V1171I [1] [CAL851]<br>p.V1171I [1] [JVM3]<br>p.E1976G [1] [NCIH1838]          | p.V331G [1] [HCC1187]<br>p.L1033F [1] [KMRC20]<br>p.T1979A [1] [SNU1040] |
| TRIM33  | p.Q1046E [1] [NCIH2444]                                                                |                                                                                  |                                                                          |
| TRIP11  | p.I1468R [1] [S117]                                                                    | p.I1747V [1] [TE5]                                                               |                                                                          |
| TSC1    | p.T1047I [1] [NCIH2122]                                                                |                                                                                  |                                                                          |
| TSC2    | p.S660N [1] [COLO668]<br>p.E1435K [1] [ISHIKAWAHERAKLIO02ER]<br>p.R1369W [1] [UMUC3]   | p.P1458T [1] [DMS53]<br>p.I1357L [1] [KOPN8]                                     | p.N1006S [1] [ISHIKAWAHERAKLIO02ER]<br>p.A357V [1] [ST486]               |
| TSHR    | p.R701C [1] [ISHIKAWAHERAKLIO02ER]                                                     |                                                                                  |                                                                          |
| USP6    | p.M947T [1] [ISHIKAWAHERAKLIO02ER]                                                     |                                                                                  |                                                                          |
| WAS     | p.P112R [1] [KOPN8]                                                                    |                                                                                  |                                                                          |
| WHSC1   | p.D560H [1] [C2BBE1]                                                                   | p.D417N [1] [ISHIKAWAHERAKLIO02ER]                                               | p.G325D [1] [SUDHL6]                                                     |
| WHSC1L1 | p.P361S [1] [NCIH1437]                                                                 | p.P1071L [1] [OV56]                                                              |                                                                          |
| WRN     | p.E510D [1] [CCK81]<br>p.N166K [1] [HT1080]<br>p.E510D [1] [SNU175]                    | p.I1183M [1] [CMK]<br>p.S759F [1] [ISHIKAWAHERAKLIO02ER]<br>p.E510D [1] [SNU423] | p.D460G [1] [HSC4]<br>p.P504L [1] [NCIH1436]                             |
| WT1     | p.G178R [1] [COLO792]                                                                  | p.P129Q [1] [NCIH2291]                                                           |                                                                          |
| XPC     | p.S291C [1] [NCIH929]                                                                  | p.A674V [1] [SNU1040]                                                            |                                                                          |
| ZNF331  | p.R197Q [1] [NCIH520]                                                                  |                                                                                  |                                                                          |
| ZNF384  | p.Q495H [1] [HCT15]<br>p.Q498H [1] [SUPHD1]                                            | p.A474T [1] [PANC0327]                                                           | p.P119S [1] [SNU1040]                                                    |
| ZNF521  | p.S397L [1] [PF382]                                                                    | p.Y441H [1] [SNU1040]                                                            | p.R3H [1] [SNU81]                                                        |

## Supplementary Table 1 (B)

Mutations that were only identified by COSMIC in the comparison of sequencing data of 1630 genes across 568 cell lines from CCLE and COSMIC

| Gene     | Mutation                                                                                                                                                                                                                                                                                                                                    | Mutation                                                                                                                                                                                                                                                                                                                                    | Mutation                                                                                                                                                                                                                                                                                                                        |
|----------|---------------------------------------------------------------------------------------------------------------------------------------------------------------------------------------------------------------------------------------------------------------------------------------------------------------------------------------------|---------------------------------------------------------------------------------------------------------------------------------------------------------------------------------------------------------------------------------------------------------------------------------------------------------------------------------------------|---------------------------------------------------------------------------------------------------------------------------------------------------------------------------------------------------------------------------------------------------------------------------------------------------------------------------------|
| ABI1     | p.S305A [1] [DAUDI]<br>p.G312S [1] [SW48]                                                                                                                                                                                                                                                                                                   | p.T41A [1] [JVM3]                                                                                                                                                                                                                                                                                                                           | p.N388T [1] [LS411N]                                                                                                                                                                                                                                                                                                            |
| ABL1     | p.A1026T [1] [C32]<br>p.G753V [1] [G11]<br>p.H552R [1] [HT]<br>p.F747I [1] [RKO]<br>p.R820W [1] [SNU175]<br>p.E871K [1] [TGBC11TKB]                                                                                                                                                                                                         | p.A922V [1] [CCK81]<br>p.E527K [1] [HARA]<br>p.N770S [1] [LNCAPCLONEFGC]<br>p.T319A [1] [SNU1040]<br>p.H396Q [1] [SNU423]<br>p.P914L [1] [VMCUB1]                                                                                                                                                                                           | p.T700I [1] [COLO792]<br>p.Y257C [1] [HCT116]<br>p.P899S [1] [MHHCALL4]<br>p.A898V [1] [SNU1040]<br>p.G701S [1] [TGBC11TKB]                                                                                                                                                                                                     |
| ABL2     | p.C534W [1] [A2780]<br>p.P9T [1] [KYSE450]<br>p.G1122A [1] [ONS76]                                                                                                                                                                                                                                                                          | p.S655P [1] [DAUDI]<br>p.R632H [1] [LNCAPCLONEFGC]<br>p.R941L [1] [OVTOKO]                                                                                                                                                                                                                                                                  | p.A559S [1] [HCC1395]<br>p.C22Y [1] [NCIH1836]                                                                                                                                                                                                                                                                                  |
| AKAP9    | p.R3628Q [1] [22RV1]<br>p.H1796R [1] [CA46]<br>p.T1039A [1] [CL34]<br>p.E451V [1] [DMS53]<br>p.I336T [1] [G401]<br>p.N3615S [1] [HT]<br>p.D3015G [1] [JM1]<br>p.I679L [1] [NCIH1651]<br>p.H674Y [1] [NCIH2347]<br>p.A1484P [1] [NCIH661]<br>p.R661Q [1] [OVK18]<br>p.K3234R [1] [RPMI7951]<br>p.I662T [1] [SNU1040]<br>p.E182G [1] [SNU475] | p.K1643M [1] [647V]<br>p.E1933K [1] [CAL148]<br>p.Q2032P [1] [CW2]<br>p.T3701I [1] [DU145]<br>p.R3241W [1] [HH]<br>p.Q2742R [1] [HUPT3]<br>p.M1323K [1] [KPNYN]<br>p.E746V [1] [NCIH1755]<br>p.I3281T [1] [NCIH460]<br>p.V2002L [1] [NCIH661]<br>p.K49E [1] [RKO]<br>p.E2260Q [1] [SF126]<br>p.R1129H [1] [SNU1040]<br>p.A1098T [1] [SNUC5] | p.H574R [1] [BICR31]<br>p.S994Y [1] [CAL851]<br>p.Y2870C [1] [CW2]<br>p.E1983Q [1] [FADU]<br>p.K1169E [1] [HS940T]<br>p.N187I [1] [JHH2]<br>p.S2693G [1] [LNCAPCLONEFGC]<br>p.E1008V [1] [NCIH1755]<br>p.D234V [1] [NCIH596]<br>p.Q2742R [1] [OVISE]<br>p.R2028C [1] [RPMI7951]<br>p.Q2742R [1] [SNGM]<br>p.Q2742R [1] [SNU449] |
| AKT1     | p.E40K [1] [ISHIKAWAHERAKLIO02ER]                                                                                                                                                                                                                                                                                                           | p.Y215H [1] [MFE319]                                                                                                                                                                                                                                                                                                                        | p.A230T [1] [SNU1040]                                                                                                                                                                                                                                                                                                           |
| AKT2     | p.A232T [1] [CW2]<br>p.R368C [1] [SNU1040]                                                                                                                                                                                                                                                                                                  | p.K216T [1] [CW2]<br>p.C60Y [1] [SNU1040]                                                                                                                                                                                                                                                                                                   | p.T132M [1] [DU145]                                                                                                                                                                                                                                                                                                             |
| ALK      | p.L274P [1] [AN3CA]<br>p.Q897L [1] [DAUDI]<br>p.E949K [1] [KLE]<br>p.N1353S [1] [NCIH1355]<br>p.M1290I [1] [NCIH716]<br>p.S235P [1] [SF126]<br>p.M1223I [1] [SNU1040]                                                                                                                                                                       | p.K1109N [1] [CAL51]<br>p.T533A [1] [HCT15]<br>p.P1298S [1] [KM12]<br>p.K1518N [1] [NCIH1755]<br>p.A206T [1] [PF382]<br>p.T1312I [1] [SIGM5]<br>p.R1436C [1] [SNU175]                                                                                                                                                                       | p.T901A [1] [DAUDI]<br>p.D1349N [1] [HT115]<br>p.G1580V [1] [LOVO]<br>p.Q450H [1] [NCIH1793]<br>p.N941S [1] [SBC5]<br>p.F1174L [1] [SKNSH]<br>p.H281Q [1] [SNU449]                                                                                                                                                              |
| APC      | p.T584I [1] [639V]<br>p.E2617K [1] [EN]<br>p.R1790K [1] [KMS11]<br>p.R549S [1] [MDST8]<br>p.A1358T [1] [NCIH1650]<br>p.N813S [1] [SKMEL3]<br>p.R1171H [1] [SNU1040]<br>p.Y486C [1] [TGBC11TKB]                                                                                                                                              | p.C1270R [1] [A498]<br>p.F814C [1] [ESS1]<br>p.E1209K [1] [LNCAPCLONEFGC]<br>p.T1082S [1] [MFE280]<br>p.A1225S [1] [OVCAR8]<br>p.R94C [1] [SNU1040]<br>p.S2129L [1] [SNU81]                                                                                                                                                                 | p.N862K [1] [CMK]<br>p.I1779M [1] [HCT15]<br>p.A2778V [1] [LNCAPCLONEFGC]<br>p.R1589H [1] [MOLT16]<br>p.G253S [1] [P121CHIKAWA]<br>p.A759S [1] [SNU1040]<br>p.S2575Y [1] [SW1990]                                                                                                                                               |
| ARHGEF12 | p.Q933E [1] [BT474]<br>p.E1164K [1] [MEWO]<br>p.T1221A [1] [SNU1040]                                                                                                                                                                                                                                                                        | p.D308Y [1] [CMK]<br>p.H1280P [1] [NCIH1876]<br>p.A1466V [1] [SNU1040]                                                                                                                                                                                                                                                                      | p.S694P [1] [KU1919]<br>p.P1025S [1] [SNU1040]<br>p.E64K [1] [SNU81]                                                                                                                                                                                                                                                            |
| ARID1A   | p.G1848W [1] [AN3CA]<br>p.T1302S [1] [HT1376]                                                                                                                                                                                                                                                                                               | p.S949P [1] [DAUDI]<br>p.T1217I [1] [LNCAPCLONEFGC]                                                                                                                                                                                                                                                                                         | p.G444S [1] [HS746T]<br>p.G1178A [1] [NCIH2110]                                                                                                                                                                                                                                                                                 |

|        |                                                                                                                                                                                                                           |                                                                                                                                                                                             |                                                                                                                                                                                           |
|--------|---------------------------------------------------------------------------------------------------------------------------------------------------------------------------------------------------------------------------|---------------------------------------------------------------------------------------------------------------------------------------------------------------------------------------------|-------------------------------------------------------------------------------------------------------------------------------------------------------------------------------------------|
|        | p.S638I [1] [OE21]<br>p.A1885V [1] [SCC15]<br>p.T1917A [1] [SNUC5]                                                                                                                                                        | p.T1514R [1] [P31FUJ]<br>p.S402L [1] [SNU1040]<br>p.V1982I [1] [THP1]                                                                                                                       | p.A873T [1] [REH]<br>p.P887T [1] [SNU1040]                                                                                                                                                |
| ARNT   | p.A687T [1] [COLO684]<br>p.P631L [1] [LK2]<br>p.R379C [1] [SNU1040]                                                                                                                                                       | p.V464M [1] [CW2]<br>p.I41V [1] [LS180]                                                                                                                                                     | p.V612I [1] [JVM2]<br>p.V416M [1] [MOLT16]                                                                                                                                                |
| ASPSR1 | p.S607F [1] [A375]<br>p.W496G [1] [DKMG]<br>p.R301W [1] [MFE319]<br>p.A196T [1] [RCHACV]<br>p.R545W [1] [SNU407]<br>p.N69S [1] [SW1990]                                                                                   | p.W496G [1] [BHY]<br>p.R502Q [1] [EFO27]<br>p.L416S [1] [MOLT13]<br>p.R85H [1] [RL952]<br>p.F344L [1] [SNU81]                                                                               | p.R478H [1] [CFPAC1]<br>p.R545W [1] [KP2]<br>p.S589C [1] [NCIH2342]<br>p.T146M [1] [SKMEL2]<br>p.Q55P [1] [SW1271]                                                                        |
| ATF1   | p.S7N [1] [MDAMB361]                                                                                                                                                                                                      |                                                                                                                                                                                             |                                                                                                                                                                                           |
| ATIC   | p.H584R [1] [CAOV3]<br>p.H584R [1] [LS180]                                                                                                                                                                                | p.H584R [1] [DBTRG05MG]<br>p.H584R [1] [SKUT1]                                                                                                                                              | p.Y558F [1] [LNCAPCLONEFGC]<br>p.V548I [1] [SNU1040]                                                                                                                                      |
| ATM    | p.K1101E [1] [22RV1]<br>p.R1618Q [1] [CAL78]<br>p.D2661N [1] [KYSE410]<br>p.C1482R [1] [NCIH810]<br>p.Q1128E [1] [TE9]                                                                                                    | p.H1876Q [1] [5637]<br>p.A1127V [1] [HCT116]<br>p.N1005I [1] [MDAMB231]<br>p.M1967V [1] [PF382]<br>p.R832C [1] [UACC812]                                                                    | p.K482Q [1] [BT20]<br>p.A2635G [1] [KYSE150]<br>p.F1896L [1] [MFE319]<br>p.H448R [1] [SW837]                                                                                              |
| ATRX   | p.S747R [1] [CCK81]<br>p.M2426L [1] [DAUDI]<br>p.T154A [1] [DAUDI]<br>p.Q606E [1] [HCC38]<br>p.K1044N [1] [NAMALWA]<br>p.K1169Q [1] [OCILY19]<br>p.I2454T [1] [PF382]<br>p.P1586A [1] [RPMI8402]<br>p.K1177N [1] [VMCUB1] | p.P2462S [1] [DAUDI]<br>p.N2419T [1] [DAUDI]<br>p.E155D [1] [DND41]<br>p.E723D [1] [MDAMB231]<br>p.E155D [1] [OCIAML5]<br>p.A1272P [1] [OVISE]<br>p.S76P [1] [PF382]<br>p.N564S [1] [U87MG] | p.N2447T [1] [DAUDI]<br>p.E155D [1] [DAUDI]<br>p.T154A [1] [DND41]<br>p.D412G [1] [MG63]<br>p.T154A [1] [OCIAML5]<br>p.I1271N [1] [OVISE]<br>p.I1894M [1] [RAJI]<br>p.S2017C [1] [UACC62] |
| AXIN1  | p.V846I [1] [EB2]<br>p.Q108L [1] [JHH7]<br>p.A277T [1] [KCL22]<br>p.R803C [1] [NCIH2110]<br>p.A510T [1] [SNU175]                                                                                                          | p.E640K [1] [EFO27]<br>p.D95G [1] [JHH7]<br>p.E640K [1] [KM12]<br>p.S511L [1] [SF126]<br>p.V535I [1] [TGBC11TKB]                                                                            | p.Q361R [1] [EN]<br>p.D94E [1] [JHH7]<br>p.R353H [1] [LOVO]<br>p.A804T [1] [SNU1040]                                                                                                      |
| BAP1   | p.S609G [1] [JEKO1]<br>p.N515S [1] [SNUC5]                                                                                                                                                                                | p.I586V [1] [KMRC20]<br>p.N299S [1] [SUPHD1]                                                                                                                                                | p.R227H [1] [MOLT13]<br>p.K580R [1] [VMRCRCW]                                                                                                                                             |
| BCL10  | p.R232Q [1] [CA46]<br>p.R228H [1] [SNU1040]                                                                                                                                                                               | p.T162M [1] [KPNYN]                                                                                                                                                                         | p.T163A [1] [LNCAPCLONEFGC]                                                                                                                                                               |
| BCL11A | p.S627R [1] [CMLT1]<br>p.A413T [1] [HCT15]<br>p.S528N [1] [MEWO]<br>p.Q681K [1] [NCIH2170]<br>p.A80G [1] [OCIAML5]                                                                                                        | p.A80G [1] [DAUDI]<br>p.S696N [1] [JVM3]<br>p.S696I [1] [NCIH1623]<br>p.G606C [1] [NCIH2172]<br>p.N236D [1] [PF382]                                                                         | p.K634E [1] [DND41]<br>p.A665T [1] [LNCAPCLONEFGC]<br>p.P358S [1] [NCIH1876]<br>p.S679P [1] [NCIH2342]<br>p.F315L [1] [SNU81]                                                             |
| BCL11B | p.P666S [1] [AM38]<br>p.A204T [1] [CW2]<br>p.R671C [1] [NCIH1435]<br>p.E553K [1] [RS411]<br>p.A606E [1] [VMRCLCD]                                                                                                         | p.P697S [1] [CHAGOK1]<br>p.M843I [1] [EB2]<br>p.G580W [1] [NCIH2110]<br>p.T812A [1] [SNU1040]                                                                                               | p.R822W [1] [CW2]<br>p.Y800H [1] [HCC1569]<br>p.T406M [1] [RCHACV]<br>p.K825N [1] [VMRCLCD]                                                                                               |
| BCL2   | p.E200D [1] [CW2]<br>p.T7K [1] [JVM3]<br>p.E13D [1] [OCILY19]<br>p.P59T [1] [SUDHL4]                                                                                                                                      | p.P59A [1] [JM1]<br>p.A42V [1] [OCILY19]<br>p.A60V [1] [RL]<br>p.I48F [1] [SUDHL6]                                                                                                          | p.G8E [1] [JM1]<br>p.V35M [1] [OCILY19]<br>p.D31H [1] [RL]<br>p.P59A [1] [WSUDLCL2]                                                                                                       |

|        |                                                                                                                                                                                                                                                                                             |                                                                                                                                                                                                                                                                                                     |                                                                                                                                                                                                                                                                                                  |
|--------|---------------------------------------------------------------------------------------------------------------------------------------------------------------------------------------------------------------------------------------------------------------------------------------------|-----------------------------------------------------------------------------------------------------------------------------------------------------------------------------------------------------------------------------------------------------------------------------------------------------|--------------------------------------------------------------------------------------------------------------------------------------------------------------------------------------------------------------------------------------------------------------------------------------------------|
|        | p.E13D [1] [WSUDLCL2]                                                                                                                                                                                                                                                                       | p.N11H [1] [WSUDLCL2]                                                                                                                                                                                                                                                                               |                                                                                                                                                                                                                                                                                                  |
| BCL3   | p.P92L [1] [NCIH1355]                                                                                                                                                                                                                                                                       | p.A308V [1] [SNU1040]                                                                                                                                                                                                                                                                               |                                                                                                                                                                                                                                                                                                  |
| BCL6   | p.M501V [1] [EBC1]<br>p.M454T [1] [TGBC11TKB]                                                                                                                                                                                                                                               | p.P458S [1] [KYSE510]                                                                                                                                                                                                                                                                               | p.A291V [1] [SNU1040]                                                                                                                                                                                                                                                                            |
| BCL7A  | p.S164N [1] [CW2]                                                                                                                                                                                                                                                                           | p.P78L [1] [MFE319]                                                                                                                                                                                                                                                                                 |                                                                                                                                                                                                                                                                                                  |
| BCL9   | p.S591N [1] [CORL88]<br>p.V1098M [1] [DAUDI]<br>p.G1200A [1] [DAUDI]<br>p.N1101S [1] [DND41]<br>p.N832S [1] [OCIAML5]<br>p.A226T [1] [SNU1040]<br>p.V1098M [1] [SNU1040]<br>p.M661L [1] [TT]                                                                                                | p.Q52P [1] [DAUDI]<br>p.N1101S [1] [DAUDI]<br>p.N832S [1] [DND41]<br>p.R1238H [1] [LNCAPCLONEFGC]<br>p.V1098M [1] [OCIAML5]<br>p.P231L [1] [SNU1040]<br>p.G1230R [1] [SNU1040]<br>p.P467L [1] [WM115]                                                                                               | p.N832S [1] [DAUDI]<br>p.A1190P [1] [DAUDI]<br>p.V1098M [1] [DND41]<br>p.Q52P [1] [OCIAML5]<br>p.N1101S [1] [OCIAML5]<br>p.A471V [1] [SNU1040]<br>p.E1256G [1] [SNU1040]                                                                                                                         |
| BCR    | p.E1143K [1] [42MGBA]<br>p.M1119T [1] [BT474]<br>p.D225A [1] [DB]<br>p.A1095V [1] [HCT15]<br>p.A1100T [1] [PF382]<br>p.E1270D [1] [SNGM]<br>p.R361C [1] [SNU1040]                                                                                                                           | p.M1119T [1] [A253]<br>p.V189L [1] [CPCN]<br>p.F923L [1] [EB2]<br>p.R132P [1] [L363]<br>p.E483V [1] [PL21]<br>p.R162C [1] [SNU1040]<br>p.R1133C [1] [SNU1040]                                                                                                                                       | p.E1270D [1] [AM38]<br>p.F176L [1] [CW2]<br>p.S1219N [1] [HCC15]<br>p.R1213W [1] [NCIH1693]<br>p.R132P [1] [SCC15]<br>p.R254C [1] [SNU1040]                                                                                                                                                      |
| BIRC3  | p.N264I [1] [NCIH1876]<br>p.R411K [1] [SNU182]                                                                                                                                                                                                                                              | p.A165G [1] [SNU1040]<br>p.R159I [1] [SNU81]                                                                                                                                                                                                                                                        | p.A17T [1] [SNU182]                                                                                                                                                                                                                                                                              |
| BLM    | p.S1094A [1] [8305C]<br>p.M348I [1] [HSC4]<br>p.S1368A [1] [NCIH1436]<br>p.H457R [1] [SNU1040]<br>p.P211S [1] [TE10]                                                                                                                                                                        | p.K1009E [1] [CMK]<br>p.K653T [1] [KM12]<br>p.F479L [1] [NCIH1573]<br>p.A920T [1] [SNU1040]                                                                                                                                                                                                         | p.D153N [1] [DND41]<br>p.I1367M [1] [LS180]<br>p.I366T [1] [SKUT1]<br>p.A196T [1] [T98G]                                                                                                                                                                                                         |
| BMPR1A | p.Q304R [1] [HCC70]<br>p.N373I [1] [KASUMI1]<br>p.C110Y [1] [NUDUL1]                                                                                                                                                                                                                        | p.G351D [1] [HCT15]<br>p.G300C [1] [LNCAPCLONEFGC]                                                                                                                                                                                                                                                  | p.A357T [1] [HGC27]<br>p.Q304R [1] [NCIH23]                                                                                                                                                                                                                                                      |
| BRAF   | p.R506G [1] [CCK81]<br>p.I326V [1] [KYSE180]<br>p.I326V [1] [P121CHIKAWA]<br>p.I326V [1] [TE1]                                                                                                                                                                                              | p.I326V [1] [EN]<br>p.S727G [1] [MFE319]<br>p.V120I [1] [SNU1040]<br>p.I326T [1] [ZR7530]                                                                                                                                                                                                           | p.E296K [1] [HCC2218]<br>p.I326V [1] [NB1]<br>p.S76P [1] [SNU1040]                                                                                                                                                                                                                               |
| BRCA1  | p.D1398N [1] [BFTC905]<br>p.E962K [1] [DU145]<br>p.S663N [1] [HCT15]<br>p.P1579S [1] [KM12]<br>p.G890V [1] [NCIH1703]<br>p.S1542C [1] [PANC0203]<br>p.T539M [1] [SKNDZ]                                                                                                                     | p.Q1459P [1] [CAPAN2]<br>p.D1546N [1] [GDM1]<br>p.K1711R [1] [HT115]<br>p.I1058V [1] [KYSE140]<br>p.E1629V [1] [NCIH2066]<br>p.I571T [1] [PANC1005]<br>p.I1044V [1] [VMRCRCZ]                                                                                                                       | p.G401E [1] [CCK81]<br>p.L30F [1] [HCC2157]<br>p.S114T [1] [J82]<br>p.N810T [1] [LS180]<br>p.Q1299H [1] [NCIH2172]<br>p.V271M [1] [RCC10RGB]                                                                                                                                                     |
| BRCA2  | p.V1810I [1] [22RV1]<br>p.V1810I [1] [CL34]<br>p.R448C [1] [DAUDI]<br>p.C2473Y [1] [EB2]<br>p.T1520N [1] [HCC1599]<br>p.S617P [1] [HT]<br>p.K1565N [1] [KM12]<br>p.S755F [1] [MELJUSO]<br>p.G2044D [1] [NCIH1355]<br>p.P2505L [1] [OVCAR4]<br>p.T207A [1] [RS411]<br>p.Y2789H [1] [SNU1040] | p.E1876K [1] [CALU6]<br>p.K382Q [1] [COLO741]<br>p.S3319F [1] [DAUDI]<br>p.R18H [1] [EBC1]<br>p.K644R [1] [HCC38]<br>p.E2258K [1] [HT115]<br>p.G1376E [1] [KYSE510]<br>p.I332N [1] [MFE296]<br>p.A938E [1] [NCIH1648]<br>p.D1618E [1] [RCC10RGB]<br>p.A737T [1] [SNU1040]<br>p.V2966A [1] [SNU1040] | p.T1505I [1] [CCK81]<br>p.V2014E [1] [CW2]<br>p.G602E [1] [DND41]<br>p.K1638Q [1] [HCC1428]<br>p.A487V [1] [HCT15]<br>p.S976T [1] [KG1]<br>p.M965I [1] [MDAMB468]<br>p.P1819S [1] [MHES1]<br>p.I1929V [1] [OCIM1]<br>p.I1929V [1] [RERFLCKJ]<br>p.A1996T [1] [SNU1040]<br>p.A3012G [1] [SNU1040] |

|          |                                                                                                                        |                                                                                                                      |                                                                                                                                    |
|----------|------------------------------------------------------------------------------------------------------------------------|----------------------------------------------------------------------------------------------------------------------|------------------------------------------------------------------------------------------------------------------------------------|
|          | p.S1597Y [1] [SNU81]                                                                                                   | p.P1819S [1] [T98G]                                                                                                  |                                                                                                                                    |
| BRD3     | p.R244Q [1] [639V]<br>p.E144V [1] [HT55]<br>p.R34H [1] [SNU1040]                                                       | p.P188A [1] [BT483]<br>p.L70Q [1] [KMH2]<br>p.P23T [1] [SU8686]                                                      | p.A10T [1] [DU145]<br>p.P23H [1] [NCIH1755]                                                                                        |
| BRD4     | p.R444C [1] [639V]<br>p.A292T [1] [LS411N]<br>p.H77Y [1] [RAJI]                                                        | p.A3T [1] [DAUDI]<br>p.M1320V [1] [NCIH520]<br>p.T1212P [1] [SJRH30]                                                 | p.E1339G [1] [HCT15]<br>p.I360V [1] [PF382]<br>p.A40T [1] [SNU1040]                                                                |
| BRIP1    | p.G809C [1] [639V]<br>p.T132N [1] [DU145]<br>p.E339K [1] [MDAMB361]<br>p.R814C [1] [SNU1040]<br>p.F1121V [1] [SNU81]   | p.N196S [1] [BFTC909]<br>p.R798Q [1] [HT115]<br>p.V497A [1] [OAW42]<br>p.K141E [1] [SNU1040]                         | p.N933I [1] [CW2]<br>p.G481D [1] [KYSE180]<br>p.N666H [1] [RERFLCMS]<br>p.R814C [1] [SNU175]                                       |
| BTG1     | p.K162R [1] [DAUDI]<br>p.R86W [1] [OCIAML5]                                                                            | p.R86W [1] [DAUDI]<br>p.Y5H [1] [SUPHD1]                                                                             | p.Q36H [1] [L1236]                                                                                                                 |
| BUB1B    | p.V618L [1] [A375]<br>p.R169K [1] [LK2]<br>p.E394G [1] [RD]<br>p.R677H [1] [SW1783]                                    | p.V618L [1] [HCT15]<br>p.V573M [1] [LNCAPCLONEFGC]<br>p.S543I [1] [SKOV3]                                            | p.Q181R [1] [KLE]<br>p.P545S [1] [MEWO]<br>p.S1010F [1] [SNU407]                                                                   |
| C15orf55 | p.R693I [1] [CCK81]<br>p.V379L [1] [IM95]<br>p.R43W [1] [NCIH1793]<br>p.A489T [1] [PATU8902]<br>p.F841S [1] [SNU81]    | p.G587V [1] [DEL]<br>p.K1005I [1] [KELLY]<br>p.Q968R [1] [NCIH2029]<br>p.E400Q [1] [RL952]<br>p.E478K [1] [TC71]     | p.I743T [1] [G402]<br>p.A21T [1] [KP4]<br>p.S25F [1] [NCIH650]<br>p.E782G [1] [SNU1040]                                            |
| CARD11   | p.T360A [1] [CAL51]<br>p.H651Q [1] [IGROV1]<br>p.E936Q [1] [MDAMB415]<br>p.N1061S [1] [PF382]<br>p.P720L [1] [SNU1040] | p.G533R [1] [CW2]<br>p.N665I [1] [K562]<br>p.A202S [1] [NCIH2347]<br>p.V740I [1] [SF126]<br>p.S645L [1] [SNU1040]    | p.H610R [1] [HCC1569]<br>p.S603F [1] [LNCAPCLONEFGC]<br>p.T525M [1] [PANCO203]<br>p.Y1110C [1] [SNU1040]<br>p.I1001V [1] [UACC812] |
| CARS     | p.F87L [1] [CCK81]<br>p.K104N [1] [NCIH2342]<br>p.P570L [1] [SUPM2]                                                    | p.S19T [1] [EN]<br>p.T163R [1] [NCIH82]                                                                              | p.K422E [1] [HCC1954]<br>p.A273V [1] [RS411]                                                                                       |
| CBFA2T3  | p.P318S [1] [CCK81]<br>p.V199M [1] [ECGI10]<br>p.P94L [1] [HGC27]<br>p.E312K [1] [MKN7]<br>p.H359R [1] [SKMEL2]        | p.R366Q [1] [DU4475]<br>p.H249Y [1] [HCC1806]<br>p.T71R [1] [HSC3]<br>p.G376E [1] [NCIH226]<br>p.R421H [1] [SNU1040] | p.E312K [1] [ECC10]<br>p.E214K [1] [HCT15]<br>p.T157A [1] [KCL22]<br>p.P77L [1] [SJSA1]<br>p.R368C [1] [SNU1040]                   |
| CBFB     | p.F32C [1] [LS180]                                                                                                     | p.R151H [1] [SNU1040]                                                                                                | p.R151H [1] [SNU407]                                                                                                               |
| CBL      | p.S403F [1] [KMS11]<br>p.M487V [1] [SNU398]                                                                            | p.Y700C [1] [MDAMB436]                                                                                               | p.S439G [1] [NCIH1563]                                                                                                             |
| CCDC6    | p.R246I [1] [CW2]<br>p.N16S [1] [SW1990]                                                                               | p.R271Q [1] [PF382]                                                                                                  | p.A468V [1] [SNU1040]                                                                                                              |
| CCNB1IP1 | p.C33Y [1] [22RV1]                                                                                                     | p.R169H [1] [DANG]                                                                                                   | p.R226Q [1] [TE4]                                                                                                                  |
| CCND1    | p.L244I [1] [AN3CA]<br>p.R231C [1] [SNU1040]                                                                           | p.A30T [1] [LP1]<br>p.S219N [1] [VCAP]                                                                               | p.P287L [1] [NCIH1105]                                                                                                             |
| CCND3    | p.A266V [1] [8305C]                                                                                                    | p.E70G [1] [PF382]                                                                                                   |                                                                                                                                    |
| CCNE1    | p.T91M [1] [CAL51]<br>p.D83N [1] [NCIH23]                                                                              | p.H211Y [1] [KMRC1]<br>p.R240C [1] [SNU1040]                                                                         | p.I205M [1] [KMS11]<br>p.A378T [1] [SNU1040]                                                                                       |

|        |                                                                                                                                                                                                                                           |                                                                                                                                                                                                                                          |                                                                                                                                                                                                                |
|--------|-------------------------------------------------------------------------------------------------------------------------------------------------------------------------------------------------------------------------------------------|------------------------------------------------------------------------------------------------------------------------------------------------------------------------------------------------------------------------------------------|----------------------------------------------------------------------------------------------------------------------------------------------------------------------------------------------------------------|
| CD79A  | p.G6E [1] [CMLT1]                                                                                                                                                                                                                         | p.A10T [1] [HT115]                                                                                                                                                                                                                       | p.C106Y [1] [MDAMB231]                                                                                                                                                                                         |
| CD79B  | p.W220R [1] [2313287]                                                                                                                                                                                                                     | p.N37I [1] [SNUC5]                                                                                                                                                                                                                       |                                                                                                                                                                                                                |
| CDH1   | p.V41E [1] [A253]<br>p.H45L [1] [NCIH82]<br>p.E410K [1] [TC71]                                                                                                                                                                            | p.T115M [1] [KMH2]<br>p.A818V [1] [REH]                                                                                                                                                                                                  | p.G212E [1] [KPNYN]<br>p.I96T [1] [SNU475]                                                                                                                                                                     |
| CDH11  | p.D596G [1] [DU145]<br>p.P69T [1] [NCIH2227]                                                                                                                                                                                              | p.I359T [1] [FU97]<br>p.A600S [1] [VMRCLCD]                                                                                                                                                                                              | p.S200G [1] [NCIH1876]                                                                                                                                                                                         |
| CDK12  | p.K452T [1] [HCC202]                                                                                                                                                                                                                      | p.V1282L [1] [HCC2218]                                                                                                                                                                                                                   | p.R380H [1] [SNU1040]                                                                                                                                                                                          |
| CDK4   | p.G247E [1] [LS411N]                                                                                                                                                                                                                      | p.G268E [1] [SUDHL10]                                                                                                                                                                                                                    |                                                                                                                                                                                                                |
| CDK6   | p.T121A [1] [IGROV1]                                                                                                                                                                                                                      |                                                                                                                                                                                                                                          |                                                                                                                                                                                                                |
| CDKN2A | p.H83Y [1] [CALU3]<br>p.D108G [1] [MFE319]<br>p.H83Y [1] [OPM2]<br>p.I154N [1] [SCC4]<br>p.P81L [1] [UACC257]                                                                                                                             | p.D84Y [1] [DU145]<br>p.D84V [1] [NCIH1703]<br>p.A86D [1] [OV90]<br>p.P114L [1] [SKMEL30]                                                                                                                                                | p.A102V [1] [EFO27]<br>p.F90L [1] [NCIH1915]<br>p.G67V [1] [PC14]<br>p.A127T [1] [SNU1040]                                                                                                                     |
| CDKN2C | p.K112R [1] [SNGM]                                                                                                                                                                                                                        |                                                                                                                                                                                                                                          |                                                                                                                                                                                                                |
| CEBPA  | p.H58Q [1] [KCL22]                                                                                                                                                                                                                        | p.C56W [1] [KCL22]                                                                                                                                                                                                                       | p.A274V [1] [SNU1040]                                                                                                                                                                                          |
| CHEK2  | p.R181C [1] [639V]<br>p.P85H [1] [LS411N]<br>p.S73F [1] [SNU81]                                                                                                                                                                           | p.A91T [1] [DND41]<br>p.R181C [1] [OVCAR4]<br>p.D470N [1] [SW620]                                                                                                                                                                        | p.N290T [1] [HT115]<br>p.R180H [1] [SNU407]                                                                                                                                                                    |
| CHIC2  | p.K46T [1] [HT115]                                                                                                                                                                                                                        | p.K65R [1] [IGROV1]                                                                                                                                                                                                                      |                                                                                                                                                                                                                |
| CHN1   | p.K159Q [1] [DAUDI]<br>p.Q61R [1] [IGROV1]<br>p.T185A [1] [SNU1040]                                                                                                                                                                       | p.V146I [1] [DAUDI]<br>p.T174A [1] [NCIH929]                                                                                                                                                                                             | p.L71F [1] [DBTRG05MG]<br>p.V146I [1] [OCIAML5]                                                                                                                                                                |
| CIC    | p.R507H [1] [AN3CA]<br>p.F1342V [1] [CCK81]<br>p.R30H [1] [IGROV1]<br>p.E513K [1] [KYSE510]<br>p.M931T [1] [OVK18]<br>p.G365S [1] [SNU1040]<br>p.S734L [1] [SNU475]                                                                       | p.A578V [1] [CAK11]<br>p.A1062T [1] [DU145]<br>p.A928T [1] [K562]<br>p.S1378C [1] [MM1S]<br>p.A1014V [1] [PC14]<br>p.A699V [1] [SNU1040]<br>p.R1321C [1] [SW1783]                                                                        | p.S649P [1] [CAL62]<br>p.S1306R [1] [EFO21]<br>p.Y827H [1] [KYSE450]<br>p.S385P [1] [NALM6]<br>p.S431T [1] [RL952]<br>p.L628P [1] [SNU407]                                                                     |
| CIITA  | p.P186S [1] [2313287]<br>p.T588S [1] [CAL54]<br>p.Y342C [1] [EN]<br>p.L465M [1] [HCC56]<br>p.T24A [1] [IM95]<br>p.E853K [1] [KYSE180]<br>p.A161T [1] [NCIH1963]<br>p.Y463C [1] [P121CHIKAWA]<br>p.R580H [1] [SNU1040]<br>p.R802Q [1] [TT] | p.G568S [1] [A204]<br>p.G531A [1] [CORL279]<br>p.R548W [1] [FU97]<br>p.A562T [1] [HCT15]<br>p.Q507E [1] [JHH1]<br>p.E1002K [1] [LOXIMVI]<br>p.R804Q [1] [NCIH446]<br>p.G129S [1] [PF382]<br>p.Y792H [1] [SNUC5]<br>p.A894V [1] [UACC893] | p.R795Q [1] [ABC1]<br>p.I1027T [1] [DU145]<br>p.Q619R [1] [HCC15]<br>p.P337L [1] [HH]<br>p.A1086T [1] [KYSE150]<br>p.P522T [1] [NCIH1436]<br>p.C523S [1] [ONS76]<br>p.A432T [1] [RL952]<br>p.A813T [1] [SNUC5] |
| CLTC   | p.G1658A [1] [CW2]<br>p.R1429Q [1] [LNCAPCLONEFGC]<br>p.K1535N [1] [SF295]                                                                                                                                                                | p.P1651S [1] [KM12]<br>p.A1032V [1] [MOLT13]<br>p.V1141I [1] [SNU1040]                                                                                                                                                                   | p.Q976H [1] [KMH2]<br>p.E1622K [1] [NCIH1299]<br>p.L693Q [1] [WM115]                                                                                                                                           |
| CLTCL1 | p.Q1601H [1] [639V]<br>p.V1592L [1] [HCC1569]<br>p.R793H [1] [RL952]                                                                                                                                                                      | p.S903R [1] [CCK81]<br>p.V1592L [1] [MOLT16]<br>p.R1620C [1] [SNU1040]                                                                                                                                                                   | p.V1633M [1] [CMLT1]<br>p.Y1324F [1] [NCIH650]<br>p.R297H [1] [SNU1040]                                                                                                                                        |



|         |                                                                                                                                                                                           |                                                                                                                                                                           |                                                                                                                                                                      |
|---------|-------------------------------------------------------------------------------------------------------------------------------------------------------------------------------------------|---------------------------------------------------------------------------------------------------------------------------------------------------------------------------|----------------------------------------------------------------------------------------------------------------------------------------------------------------------|
| COL1A1  | p.G461C [1] [A2058]<br>p.R361G [1] [COLO684]<br>p.D97Y [1] [HCC202]<br>p.G1025E [1] [KM12]<br>p.G1157S [1] [NALM6]<br>p.G962D [1] [PF382]<br>p.R865H [1] [SNU1040]<br>p.A628T [1] [SW900] | p.A1050G [1] [BECKER]<br>p.D1344N [1] [ECC12]<br>p.P789S [1] [HT]<br>p.K228N [1] [KYSE450]<br>p.E828K [1] [NCIH1563]<br>p.R1252H [1] [SNU1040]<br>p.P102H [1] [SNU175]    | p.E783K [1] [BHY]<br>p.G824V [1] [HCC15]<br>p.G923D [1] [HT55]<br>p.A406V [1] [MOLT13]<br>p.G1034V [1] [NCIH2126]<br>p.A1042T [1] [SNU1040]<br>p.G424S [1] [SW780]   |
| CREB1   | p.P264T [1] [BHY]                                                                                                                                                                         | p.E8D [1] [DAUDI]                                                                                                                                                         | p.S178N [1] [JVM3]                                                                                                                                                   |
| CREB3L2 | p.F391I [1] [2313287]<br>p.R427G [1] [ONS76]                                                                                                                                              | p.A74V [1] [DU145]<br>p.A499T [1] [RKO]                                                                                                                                   | p.P469L [1] [HCT15]<br>p.V361A [1] [SNU1040]                                                                                                                         |
| CREBBP  | p.A533T [1] [AN3CA]<br>p.C1237Y [1] [DND41]<br>p.N831S [1] [JHH1]<br>p.N83T [1] [NCIH2122]<br>p.M866T [1] [RKO]<br>p.W1502L [1] [SNGM]<br>p.P800L [1] [SNU1040]                           | p.E1630K [1] [CAL51]<br>p.M2042T [1] [EN]<br>p.N2111S [1] [LU65]<br>p.K68R [1] [OVK18]<br>p.P2313L [1] [RPMI8402]<br>p.R2294W [1] [SNU1040]<br>p.I1084V [1] [SW48]        | p.L734M [1] [CW2]<br>p.T878A [1] [EN]<br>p.I1038V [1] [NCIH1694]<br>p.A2281T [1] [PANC0813]<br>p.T999M [1] [SKUT1]<br>p.R1851H [1] [SNU1040]<br>p.S1680F [1] [SW780] |
| CSF3R   | p.A576T [1] [22RV1]<br>p.R367Q [1] [EFO27]<br>p.T640A [1] [SW48]                                                                                                                          | p.T773A [1] [2313287]<br>p.S651N [1] [KM12]<br>p.R434I [1] [VMRCRCZ]                                                                                                      | p.R755Q [1] [CL34]<br>p.P286S [1] [MELJUSO]                                                                                                                          |
| CTNNB1  | p.V600L [1] [JJN3]<br>p.R151H [1] [SNU1040]                                                                                                                                               | p.L385H [1] [LNCAPCLONEFGC]<br>p.H176Y [1] [T98G]                                                                                                                         | p.S234A [1] [PF382]                                                                                                                                                  |
| CYLD    | p.I20S [1] [BT549]<br>p.V131A [1] [PF382]<br>p.S54F [1] [TE11]                                                                                                                            | p.T822N [1] [HUH7]<br>p.R894Q [1] [PF382]                                                                                                                                 | p.R397H [1] [NCIH1792]<br>p.C856Y [1] [REH]                                                                                                                          |
| DAXX    | p.R633W [1] [CMLT1]<br>p.R273W [1] [ISHIKAWAHERAKLIO02ER]<br>p.A226G [1] [SHP77]                                                                                                          | p.S671P [1] [EN]<br>p.R182H [1] [KE37]<br>p.A32T [1] [SNU1040]                                                                                                            | p.A4T [1] [HCT15]<br>p.N153S [1] [PANC0813]                                                                                                                          |
| DDB2    | p.V127M [1] [LOVO]                                                                                                                                                                        | p.V263I [1] [SUPHD1]                                                                                                                                                      |                                                                                                                                                                      |
| DDX10   | p.V836M [1] [HCC1569]<br>p.P535R [1] [NCIH1869]                                                                                                                                           | p.S831N [1] [KM12]                                                                                                                                                        | p.H27R [1] [MCF7]                                                                                                                                                    |
| DDX6    | p.L67R [1] [HT]                                                                                                                                                                           | p.L338W [1] [SNU81]                                                                                                                                                       |                                                                                                                                                                      |
| DEK     | p.A7T [1] [HPAFII]                                                                                                                                                                        |                                                                                                                                                                           |                                                                                                                                                                      |
| DICER1  | p.D1244H [1] [EPLC272H]<br>p.S1280N [1] [HCT15]<br>p.A1338V [1] [SNU1040]<br>p.P1653S [1] [UMUC3]                                                                                         | p.V687A [1] [HCC1569]<br>p.R1607Q [1] [HT115]<br>p.P623S [1] [TE6]                                                                                                        | p.A1174T [1] [HCT116]<br>p.N984I [1] [NAMALWA]<br>p.K371R [1] [TOV21G]                                                                                               |
| EGFR    | p.Q408R [1] [CCK81]<br>p.G682V [1] [DBTRG05MG]<br>p.A702D [1] [KYSE510]<br>p.L469W [1] [MDAMB231]<br>p.D1127N [1] [NCIH1568]<br>p.G659R [1] [REH]<br>p.V738D [1] [SUDHL6]                 | p.S306L [1] [COLO679]<br>p.A1118T [1] [FTC133]<br>p.P672R [1] [KYSE70]<br>p.T678M [1] [MDAMB361]<br>p.A750E [1] [NCIH1650]<br>p.G614S [1] [RL952]<br>p.V654M [1] [SW1116] | p.V323I [1] [CW2]<br>p.L861Q [1] [KYSE270]<br>p.T1085N [1] [L540]<br>p.A1076T [1] [NALM6]<br>p.R677C [1] [RCHACV]<br>p.Q701R [1] [SHP77]<br>p.K327E [1] [TT]         |
| EIF4A2  | p.M401I [1] [CORL88]<br>p.A334G [1] [LNCAPCLONEFGC]                                                                                                                                       | p.I68V [1] [FU97]<br>p.D308V [1] [SNU1040]                                                                                                                                | p.G13D [1] [KM12]<br>p.F228L [1] [TE9]                                                                                                                               |
| ELF4    | p.Q274P [1] [647V]<br>p.T421M [1] [MFE296]                                                                                                                                                | p.R179Q [1] [HT55]<br>p.P360S [1] [MFE319]                                                                                                                                | p.T88S [1] [HT55]                                                                                                                                                    |

|       |                                                                                                                                                                    |                                                                                                                                                                      |                                                                                                                                                                               |
|-------|--------------------------------------------------------------------------------------------------------------------------------------------------------------------|----------------------------------------------------------------------------------------------------------------------------------------------------------------------|-------------------------------------------------------------------------------------------------------------------------------------------------------------------------------|
| ELL   | p.R445H [1] [639V]<br>p.A172T [1] [SNUC5]<br>p.D464E [1] [VMCUB1]                                                                                                  | p.S600N [1] [SNU1040]<br>p.A541P [1] [SUDHL1]                                                                                                                        | p.R467W [1] [SNU1040]<br>p.S498R [1] [SUDHL4]                                                                                                                                 |
| ELN   | p.P667S [1] [697]<br>p.P658T [1] [LOVO]<br>p.G12V [1] [NCIH2342]                                                                                                   | p.A450T [1] [AN3CA]<br>p.G552R [1] [MSTO211H]<br>p.A447T [1] [TE9]                                                                                                   | p.R721Q [1] [HCT116]<br>p.K448M [1] [NCIH1836]                                                                                                                                |
| EML4  | p.R23H [1] [CMLT1]<br>p.D190G [1] [ISTMES1]                                                                                                                        | p.D936E [1] [CORL23]<br>p.D976G [1] [MV411]                                                                                                                          | p.S502N [1] [CW2]<br>p.I227V [1] [P31FUJ]                                                                                                                                     |
| EP300 | p.W1466L [1] [CAL33]<br>p.M675L [1] [GI1]<br>p.P1986L [1] [IM95]<br>p.Q1313E [1] [MFE319]<br>p.C1385Y [1] [PF382]<br>p.P1986L [1] [SBC5]<br>p.P2146S [1] [SNU1040] | p.G59S [1] [CMLT1]<br>p.A2259T [1] [HOS]<br>p.P820L [1] [KMH2]<br>p.E1514K [1] [NCIH1105]<br>p.P1986L [1] [RERFLCKJ]<br>p.P989S [1] [SKMEL2]<br>p.D1399N [1] [SNU81] | p.N204D [1] [COLO783]<br>p.K1045N [1] [HT115]<br>p.A105T [1] [LNCAPCLONEFGC]<br>p.F1090L [1] [NCIH524]<br>p.Y1414C [1] [RL]<br>p.S719N [1] [SNU1040]<br>p.C1201Y [1] [VMCUB1] |
| EPS15 | p.N735S [1] [5637]<br>p.S315R [1] [RCM1]                                                                                                                           | p.F800L [1] [DAUDI]<br>p.S315R [1] [RERFLCSQ1]                                                                                                                       | p.P797S [1] [DAUDI]<br>p.S841N [1] [SNU175]                                                                                                                                   |
| ERBB2 | p.V1253M [1] [GCIY]<br>p.V1253M [1] [KMS12BM]<br>p.L436V [1] [NCIN87]<br>p.L796P [1] [RKO]<br>p.V777M [1] [SNU1040]                                                | p.D1125E [1] [HT1080]<br>p.S413L [1] [NCIN87]<br>p.S1122T [1] [PF382]<br>p.G518V [1] [RL952]<br>p.R1146W [1] [SNU175]                                                | p.R678Q [1] [J82]<br>p.F425L [1] [NCIN87]<br>p.R1048C [1] [RAJI]<br>p.S335C [1] [SKMEL5]                                                                                      |
| ERCC2 | p.R185Q [1] [A673]<br>p.S397I [1] [CCK81]<br>p.N238S [1] [GI1]<br>p.R487W [1] [NALM6]<br>p.M724T [1] [SKHEP1]<br>p.R234Q [1] [SNU1040]<br>p.N68S [1] [SW1990]      | p.V599A [1] [AN3CA]<br>p.T31M [1] [CHP212]<br>p.V207M [1] [JEKO1]<br>p.Y11H [1] [PANC0813]<br>p.A182V [1] [SKNFI]<br>p.L490F [1] [SNU175]                            | p.R156Q [1] [BXP3]<br>p.V476I [1] [FADU]<br>p.V182F [1] [MOGGUVW]<br>p.Q629H [1] [RPMI8402]<br>p.E582G [1] [SNU1040]<br>p.V218I [1] [SNUC5]                                   |
| ERCC4 | p.T221A [1] [HCT116]<br>p.R740C [1] [SNU1040]<br>p.V870I [1] [SNU407]                                                                                              | p.S412N [1] [KYSE140]<br>p.A826V [1] [SNU1040]                                                                                                                       | p.G80E [1] [KYSE180]<br>p.A825G [1] [SNU182]                                                                                                                                  |
| ERCC5 | p.A459T [1] [HS940T]<br>p.S477A [1] [LS180]<br>p.A513T [1] [SW48]                                                                                                  | p.E696A [1] [IM95]<br>p.S674F [1] [MDST8]                                                                                                                            | p.E152K [1] [KYSE270]<br>p.K1123R [1] [NCIH1869]                                                                                                                              |
| ERG   | p.D213N [1] [DU145]<br>p.V162I [1] [MFE319]                                                                                                                        | p.E117D [1] [L540]<br>p.V58I [1] [SNU175]                                                                                                                            | p.R377H [1] [LS411N]                                                                                                                                                          |
| ETV1  | p.N23T [1] [DAUDI]<br>p.N23T [1] [OCIAML5]<br>p.A102T [1] [SNU1040]                                                                                                | p.A167T [1] [HCT15]<br>p.T240A [1] [PATU8902]                                                                                                                        | p.L79M [1] [NCIH2126]<br>p.I366N [1] [SNU1040]                                                                                                                                |
| ETV4  | p.R387W [1] [CMLT1]<br>p.V448I [1] [OVKATE]<br>p.A137T [1] [SNU1040]                                                                                               | p.S58R [1] [MOLP8]<br>p.E451K [1] [RPMI8402]<br>p.G480D [1] [SNU175]                                                                                                 | p.P117S [1] [NAMALWA]<br>p.R338W [1] [SNU1040]                                                                                                                                |
| ETV5  | p.T480A [1] [AN3CA]<br>p.V301I [1] [NALM6]                                                                                                                         | p.C300G [1] [CAS1]<br>p.S319C [1] [NCIH1563]                                                                                                                         | p.A175T [1] [MFE319]<br>p.W371C [1] [SNU1040]                                                                                                                                 |
| ETV6  | p.R163M [1] [CMK]<br>p.D83E [1] [KYSE450]<br>p.N243D [1] [RKO]                                                                                                     | p.R259L [1] [DU145]<br>p.P223L [1] [OV56]                                                                                                                            | p.S26T [1] [HCT15]<br>p.Y314C [1] [PF382]                                                                                                                                     |
| EWSR1 | p.C543R [1] [AN3CA]                                                                                                                                                | p.R455W [1] [CMLT1]                                                                                                                                                  | p.M294L [1] [DAUDI]                                                                                                                                                           |

|         |                                                                                                                                                |                                                                                                                                             |                                                                                                                                            |
|---------|------------------------------------------------------------------------------------------------------------------------------------------------|---------------------------------------------------------------------------------------------------------------------------------------------|--------------------------------------------------------------------------------------------------------------------------------------------|
|         | p.M294L [1] [DND41]<br>p.Q628P [1] [KURAMOCHI]<br>p.G619A [1] [RAJI]                                                                           | p.Q229H [1] [FU97]<br>p.R486H [1] [MELHO]                                                                                                   | p.R603W [1] [KCL22]<br>p.E549D [1] [NCIH2141]                                                                                              |
| EXT1    | p.V66F [1] [DAUDI]                                                                                                                             | p.H48Q [1] [DAUDI]                                                                                                                          | p.L26V [1] [DAUDI]                                                                                                                         |
| EXT2    | p.K617N [1] [EVSAT]<br>p.R64H [1] [LS411N]                                                                                                     | p.I459M [1] [HCC1569]                                                                                                                       | p.T457A [1] [LNCAPCLONEFGC]                                                                                                                |
| FANCA   | p.E1106K [1] [8305C]<br>p.A430V [1] [CCK81]<br>p.V48A [1] [IGROV1]<br>p.E369D [1] [LNCAPCLONEFGC]<br>p.L1143V [1] [REH]<br>p.S75G [1] [SNU407] | p.V677M [1] [A172]<br>p.R1144Q [1] [DANG]<br>p.P805R [1] [KO52]<br>p.R1084C [1] [LS180]<br>p.R350Q [1] [RERFLCSQ1]<br>p.R350Q [1] [TYKNU]   | p.E1351D [1] [BCPAP]<br>p.V580M [1] [FTC133]<br>p.F1008L [1] [LK2]<br>p.R1136G [1] [MFE319]<br>p.T1375A [1] [SNU175]<br>p.K701E [1] [YAPC] |
| FANCC   | p.A158V [1] [CW2]<br>p.T319M [1] [SNU1040]<br>p.M350V [1] [SU8686]                                                                             | p.I518T [1] [OVK18]<br>p.T503M [1] [SNU387]                                                                                                 | p.E265K [1] [OVK18]<br>p.R555Q [1] [SNU81]                                                                                                 |
| FANCD2  | p.S271L [1] [CAL78]<br>p.P1455S [1] [DND41]<br>p.D645Y [1] [HH]<br>p.L699V [1] [NCIH650]<br>p.Y468H [1] [SKM1]<br>p.S1345F [1] [SNU1040]       | p.S373L [1] [CAMA1]<br>p.S445C [1] [HCT15]<br>p.E827A [1] [KMS12BM]<br>p.Q626R [1] [PF382]<br>p.S612P [1] [SNU1040]<br>p.F386L [1] [SUPHD1] | p.I850V [1] [CMLT1]<br>p.D662Y [1] [HEL]<br>p.K30E [1] [NAMALWA]<br>p.M267I [1] [RCHACV]<br>p.V845A [1] [SNU1040]                          |
| FANCE   | p.A433V [1] [639V]<br>p.S154F [1] [EBC1]<br>p.A243T [1] [SNU1040]                                                                              | p.E225K [1] [CAMA1]<br>p.R134H [1] [HUPT3]<br>p.A360V [1] [SNU1040]                                                                         | p.L101P [1] [DND41]<br>p.Q161E [1] [NCIH1651]                                                                                              |
| FANCF   | p.R122W [1] [CMLT1]<br>p.T56M [1] [MFE296]                                                                                                     | p.K324E [1] [KATOIII]                                                                                                                       | p.A353S [1] [LS180]                                                                                                                        |
| FANCG   | p.P319S [1] [HCT15]<br>p.R141C [1] [SNU283]                                                                                                    | p.R127H [1] [KMH2]<br>p.L445P [1] [SNU407]                                                                                                  | p.S540G [1] [SNU1040]                                                                                                                      |
| FBXW7   | p.D90N [1] [CAL51]<br>p.N71D [1] [KCL22]                                                                                                       | p.G619R [1] [EN]                                                                                                                            | p.E65D [1] [HT115]                                                                                                                         |
| FCGR2B  | p.T118I [1] [CCK81]<br>p.M264K [1] [HUPT4]<br>p.K162N [1] [NCIH441]<br>p.S121R [1] [UACC893]                                                   | p.T118I [1] [CORL23]<br>p.A286V [1] [LNCAPCLONEFGC]<br>p.T118I [1] [RPMI8226]                                                               | p.E144D [1] [HT55]<br>p.P47L [1] [MEWO]<br>p.S177L [1] [UACC812]                                                                           |
| FGFR1   | p.S597F [1] [COLO792]<br>p.G194C [1] [MEG01]                                                                                                   | p.S124F [1] [KG1]<br>p.R209H [1] [NCIH358]                                                                                                  | p.G567D [1] [LNCAPCLONEFGC]                                                                                                                |
| FGFR1OP | p.K63R [1] [DAUDI]<br>p.S216I [1] [RCM1]                                                                                                       | p.N196S [1] [NCIH524]<br>p.K63R [1] [SJRH30]                                                                                                | p.I174T [1] [PF382]                                                                                                                        |
| FGFR2   | p.G364E [1] [AU565]<br>p.E163K [1] [MEWO]<br>p.K401R [1] [RERFLCMS]<br>p.L451I [1] [SNU1040]                                                   | p.R6C [1] [COLO792]<br>p.A355S [1] [NCIH1623]<br>p.T341M [1] [RKN]                                                                          | p.A315T [1] [ESS1]<br>p.Y328S [1] [NCIH23]<br>p.P559H [1] [SKOV3]                                                                          |
| FGFR3   | p.P62L [1] [COLO792]<br>p.T79S [1] [NCIH2009]<br>p.G561S [1] [TE6]                                                                             | p.A374T [1] [EFO27]<br>p.R359P [1] [NCIH526]                                                                                                | p.E332K [1] [KM12]<br>p.P778H [1] [SNUC5]                                                                                                  |
| FH      | p.D219N [1] [IGR37]<br>p.M454V [1] [SNU1040]                                                                                                   | p.A314T [1] [KYSE410]                                                                                                                       | p.M259I [1] [NCIH1355]                                                                                                                     |
| FHIT    | p.E133K [1] [CAL851]                                                                                                                           | p.H94R [1] [IGROV1]                                                                                                                         | p.T61M [1] [PL21]                                                                                                                          |

|          |                                                                                                                                                                                           |                                                                                                                                                                                       |                                                                                                                                                                                           |
|----------|-------------------------------------------------------------------------------------------------------------------------------------------------------------------------------------------|---------------------------------------------------------------------------------------------------------------------------------------------------------------------------------------|-------------------------------------------------------------------------------------------------------------------------------------------------------------------------------------------|
|          | p.M82I [1] [SNU1040]                                                                                                                                                                      |                                                                                                                                                                                       |                                                                                                                                                                                           |
| FIP1L1   | p.N289S [1] [DAUDI]<br>p.G133E [1] [KYSE510]<br>p.R483T [1] [TGBC11TKB]                                                                                                                   | p.T266P [1] [ESS1]<br>p.G179R [1] [MM15]                                                                                                                                              | p.S37G [1] [HT115]<br>p.G427D [1] [SNU1040]                                                                                                                                               |
| FLI1     | p.A297T [1] [SNU1040]                                                                                                                                                                     |                                                                                                                                                                                       |                                                                                                                                                                                           |
| FLT3     | p.A642V [1] [CGTHW1]<br>p.E293K [1] [KYSE510]<br>p.T382S [1] [SAOS2]<br>p.N122S [1] [SNUC5]                                                                                               | p.H746R [1] [IGROV1]<br>p.A443T [1] [MOLT13]<br>p.A450V [1] [SKOV3]                                                                                                                   | p.A445T [1] [JHH7]<br>p.E716D [1] [RL952]<br>p.S59A [1] [SKOV3]                                                                                                                           |
| FNBP1    | p.A95T [1] [CMLT1]<br>p.V100E [1] [SKOV3]                                                                                                                                                 | p.A160T [1] [COLO792]<br>p.D144V [1] [SNGM]                                                                                                                                           | p.Q363P [1] [DAUDI]                                                                                                                                                                       |
| FOXP1    | p.G30A [1] [A3KAW]<br>p.P209S [1] [LOXIMVI]<br>p.Y565C [1] [SUPHD1]                                                                                                                       | p.E674D [1] [A498]<br>p.Q184H [1] [NCIH2227]                                                                                                                                          | p.M101V [1] [HSC2]<br>p.M101V [1] [P31FUJ]                                                                                                                                                |
| FUS      | p.S165T [1] [UACC893]                                                                                                                                                                     |                                                                                                                                                                                       |                                                                                                                                                                                           |
| GAS7     | p.Q277H [1] [HCC15]                                                                                                                                                                       | p.D434N [1] [KYSE70]                                                                                                                                                                  | p.A134T [1] [SNU407]                                                                                                                                                                      |
| GATA1    | p.P14A [1] [NCIH660]                                                                                                                                                                      | p.A254E [1] [TOV21G]                                                                                                                                                                  |                                                                                                                                                                                           |
| GATA2    | p.H51Y [1] [KP3]                                                                                                                                                                          | p.R337Q [1] [SNU1040]                                                                                                                                                                 |                                                                                                                                                                                           |
| GMPS     | p.R435T [1] [HUCCT1]<br>p.G20D [1] [SNU1040]                                                                                                                                              | p.P673T [1] [OE33]                                                                                                                                                                    | p.R320W [1] [REH]                                                                                                                                                                         |
| GNAQ     | p.R37H [1] [HCT116]                                                                                                                                                                       | p.F228C [1] [HT115]                                                                                                                                                                   | p.D23E [1] [KMH2]                                                                                                                                                                         |
| GNAS     | p.P335L [1] [A2780]<br>p.A272E [1] [CPCN]<br>p.I330V [1] [EB2]<br>p.A314V [1] [KM12]<br>p.H41Y [1] [LNCAPCLONEFGC]<br>p.R562H [1] [MOLT16]<br>p.S96P [1] [PF382]<br>p.R544W [1] [SNU1040] | p.P219S [1] [AN3CA]<br>p.P336S [1] [CW2]<br>p.D167H [1] [HCC78]<br>p.Q25H [1] [KPNYN]<br>p.K635E [1] [LS411N]<br>p.E350G [1] [NCIH2342]<br>p.R232H [1] [RAJ]<br>p.R232H [1] [SNU1040] | p.S305P [1] [BFTC905]<br>p.R547S [1] [DU145]<br>p.A364D [1] [J82]<br>p.D333E [1] [KYSE410]<br>p.K24T [1] [MOLP8]<br>p.E303K [1] [NCIH661]<br>p.A257T [1] [SNU1040]<br>p.E140Q [1] [SW900] |
| GOLGA5   | p.P58T [1] [A204]<br>p.D408V [1] [SKM1]                                                                                                                                                   | p.G87A [1] [NCIH2009]<br>p.S453F [1] [SNU1040]                                                                                                                                        | p.K199E [1] [NCIH460]<br>p.A629T [1] [SNU182]                                                                                                                                             |
| GOPC     | p.K167T [1] [HCC366]                                                                                                                                                                      | p.S412N [1] [IGROV1]                                                                                                                                                                  |                                                                                                                                                                                           |
| GPC3     | p.A232P [1] [OVISE]                                                                                                                                                                       | p.D534G [1] [SKUT1]                                                                                                                                                                   |                                                                                                                                                                                           |
| GPHN     | p.P251S [1] [DBTRG05MG]<br>p.H624N [1] [LNCAPCLONEFGC]                                                                                                                                    | p.H271N [1] [DEL]<br>p.R350H [1] [NALM6]                                                                                                                                              | p.S250G [1] [EN]                                                                                                                                                                          |
| HIP1     | p.T711P [1] [HCC38]<br>p.P108S [1] [LNCAPCLONEFGC]<br>p.R444Q [1] [SNU1040]                                                                                                               | p.G773A [1] [KMH2]<br>p.D721E [1] [LOVO]<br>p.L342V [1] [SNU81]                                                                                                                       | p.Y135C [1] [LNCAPCLONEFGC]<br>p.G766S [1] [PF382]                                                                                                                                        |
| HIST1H4I | p.R79H [1] [SNU1040]                                                                                                                                                                      | p.R79L [1] [TGBC11TKB]                                                                                                                                                                |                                                                                                                                                                                           |
| HLF      | p.L126I [1] [DU145]                                                                                                                                                                       |                                                                                                                                                                                       |                                                                                                                                                                                           |
| HMGA1    | p.R24G [1] [AM38]                                                                                                                                                                         |                                                                                                                                                                                       |                                                                                                                                                                                           |
| HMGA2    | p.V88I [1] [RL952]                                                                                                                                                                        | p.K93N [1] [TT2609C02]                                                                                                                                                                |                                                                                                                                                                                           |

|           |                                                                                                                                           |                                                                                                                    |                                                                                                                  |
|-----------|-------------------------------------------------------------------------------------------------------------------------------------------|--------------------------------------------------------------------------------------------------------------------|------------------------------------------------------------------------------------------------------------------|
| HNRNPA2B1 | p.W32L [1] [DB]                                                                                                                           | p.R226C [1] [HCC1569]                                                                                              | p.Y324C [1] [LS411N]                                                                                             |
| HOXA11    | p.S164N [1] [DAUDI]<br>p.E152K [1] [NCIH2228]<br>p.A99T [1] [SNUC5]                                                                       | p.E259A [1] [HT]<br>p.P8H [1] [RCHACV]                                                                             | p.G24A [1] [NCIH1436]<br>p.C246Y [1] [REH]                                                                       |
| HOXA13    | p.Q333E [1] [KMH2]<br>p.R10G [1] [TC71]                                                                                                   | p.M211V [1] [KP4]                                                                                                  | p.V16I [1] [SW780]                                                                                               |
| HOXA9     | p.S171R [1] [MIAPACA2]                                                                                                                    |                                                                                                                    |                                                                                                                  |
| HOXC11    | p.P130T [1] [HARA]<br>p.A29T [1] [SNU1040]                                                                                                | p.P130T [1] [PC14]<br>p.G81S [1] [SNU1040]                                                                         | p.R15C [1] [SNU1040]                                                                                             |
| HOXC13    | p.R10H [1] [NALM6]                                                                                                                        |                                                                                                                    |                                                                                                                  |
| HOXD11    | p.G67S [1] [2313287]<br>p.R283S [1] [NCIH2227]                                                                                            | p.P74S [1] [CW2]<br>p.S33L [1] [RS411]                                                                             | p.E284G [1] [LNCAPCLONEFGC]                                                                                      |
| HOXD13    | p.N290K [1] [KYSE150]                                                                                                                     |                                                                                                                    |                                                                                                                  |
| HRAS      | p.G12D [1] [HS578T]                                                                                                                       | p.L171P [1] [PF382]                                                                                                | p.A11T [1] [RCHACV]                                                                                              |
| IDH2      | p.S408R [1] [LS513]                                                                                                                       | p.S408R [1] [MELHO]                                                                                                |                                                                                                                  |
| IKZF1     | p.T194M [1] [639V]<br>p.S247N [1] [COLO668]<br>p.W141R [1] [G402]<br>p.R74C [1] [IPC298]<br>p.I125V [1] [OCIAML5]<br>p.P113T [1] [UACC62] | p.G106V [1] [AU565]<br>p.Y321S [1] [COLO792]<br>p.R74L [1] [HCC15]<br>p.C150Y [1] [KCL22]<br>p.D186Y [1] [OCIAML5] | p.G57E [1] [CHAGOK1]<br>p.I125V [1] [DAUDI]<br>p.R163C [1] [HT115]<br>p.Q44H [1] [KYSE150]<br>p.R69C [1] [PF382] |
| IL2       | p.R140K [1] [CW2]                                                                                                                         | p.P54S [1] [MELHO]                                                                                                 |                                                                                                                  |
| IL21R     | p.S492N [1] [HCT116]<br>p.G152D [1] [LS411N]                                                                                              | p.V245A [1] [KMH2]<br>p.G439A [1] [MIAPACA2]                                                                       | p.I98V [1] [KYSE150]<br>p.M1V [1] [SNU407]                                                                       |
| IL6ST     | p.H822P [1] [DAUDI]<br>p.R911W [1] [SNU1040]                                                                                              | p.S732L [1] [IM95]                                                                                                 | p.V38A [1] [LNCAPCLONEFGC]                                                                                       |
| IRF4      | p.E236K [1] [BT483]                                                                                                                       | p.G323R [1] [SNU1040]                                                                                              | p.S366A [1] [SNU81]                                                                                              |
| ITK       | p.A191T [1] [HARA]<br>p.Q373K [1] [SCABER]                                                                                                | p.K385N [1] [LNCAPCLONEFGC]<br>p.L253F [1] [SNU81]                                                                 | p.R394Q [1] [NCIH2196]<br>p.G370C [1] [VMRCLCD]                                                                  |
| JAK1      | p.A193V [1] [2313287]<br>p.A449T [1] [LOVO]<br>p.M299T [1] [PF382]                                                                        | p.I375V [1] [C2BBE1]<br>p.L702M [1] [MHNB11]                                                                       | p.S102F [1] [ES2]<br>p.F516S [1] [ONS76]                                                                         |
| JAK2      | p.V617F [1] [CMK]<br>p.N1129S [1] [SNU1040]                                                                                               | p.L905P [1] [PF382]<br>p.Y96H [1] [SUPHD1]                                                                         | p.V563I [1] [SNU1040]<br>p.T108A [1] [SW1990]                                                                    |
| JAK3      | p.P37A [1] [CCK81]<br>p.H1113R [1] [HCT15]<br>p.G153S [1] [NCIH1436]<br>p.R180Q [1] [OCIM1]<br>p.R403H [1] [SNU1040]                      | p.T321N [1] [DAOY]<br>p.V469L [1] [KYSE140]<br>p.L471F [1] [NCIH1573]<br>p.H645Y [1] [RPMI7951]                    | p.R395C [1] [HCC1419]<br>p.M1097L [1] [LN229]<br>p.E698K [1] [NCIH661]<br>p.L1073I [1] [SKMEL24]                 |
| JAZF1     | p.R223Q [1] [IGROV1]<br>p.H103R [1] [RKO]                                                                                                 | p.R102C [1] [LS180]                                                                                                | p.R223G [1] [NCIH596]                                                                                            |
| JUN       | p.H87R [1] [CHAGOK1]                                                                                                                      |                                                                                                                    |                                                                                                                  |
| KDM5A     | p.I1708L [1] [DAUDI]                                                                                                                      | p.V1697D [1] [DAUDI]                                                                                               | p.D1156E [1] [DAUDI]                                                                                             |

|          |                                                                                                                                                                                                                                                                                          |                                                                                                                                                                                                                                                                                                       |                                                                                                                                                                                                                                                                                     |
|----------|------------------------------------------------------------------------------------------------------------------------------------------------------------------------------------------------------------------------------------------------------------------------------------------|-------------------------------------------------------------------------------------------------------------------------------------------------------------------------------------------------------------------------------------------------------------------------------------------------------|-------------------------------------------------------------------------------------------------------------------------------------------------------------------------------------------------------------------------------------------------------------------------------------|
|          | p.M1154I [1] [DAUDI]<br>p.S1507L [1] [HCC1395]<br>p.D1661N [1] [LCLC103H]<br>p.D1156E [1] [OCIAML5]<br>p.R1217W [1] [SNGM]<br>p.R1157H [1] [TOV21G]                                                                                                                                      | p.M132I [1] [DAUDI]<br>p.E44D [1] [HCC2218]<br>p.C345R [1] [LNCAPCLONEFGC]<br>p.M1154I [1] [OCIAML5]<br>p.Q1468H [1] [SNU1040]<br>p.G1695R [1] [TYKNU]                                                                                                                                                | p.R519K [1] [GRANTA519]<br>p.M540V [1] [JIMT1]<br>p.Y720H [1] [NCIH526]<br>p.S691P [1] [PF382]<br>p.Q281K [1] [T84]                                                                                                                                                                 |
| KDM6A    | p.I591V [1] [DAUDI]<br>p.I724T [1] [DAUDI]<br>p.T755M [1] [DAUDI]<br>p.M866I [1] [DAUDI]<br>p.T755M [1] [DND41]<br>p.T181A [1] [NCIH2405]<br>p.I724T [1] [OCIAML5]<br>p.T794P [1] [OCIAML5]<br>p.N1204T [1] [SNGM]                                                                       | p.Q647P [1] [DAUDI]<br>p.H733Q [1] [DAUDI]<br>p.T794P [1] [DAUDI]<br>p.N204S [1] [DND41]<br>p.T794P [1] [DND41]<br>p.Q647P [1] [OCIAML5]<br>p.H733Q [1] [OCIAML5]<br>p.A806T [1] [OCIAML5]<br>p.W321L [1] [SW48]                                                                                      | p.S651L [1] [DAUDI]<br>p.M754V [1] [DAUDI]<br>p.A806T [1] [DAUDI]<br>p.M754V [1] [DND41]<br>p.A1312T [1] [EN]<br>p.S651L [1] [OCIAML5]<br>p.T755M [1] [OCIAML5]<br>p.E745K [1] [SKUT1]                                                                                              |
| KDR      | p.G255R [1] [DEL]<br>p.A853V [1] [IGROV1]<br>p.V567M [1] [PANC0203]<br>p.R725H [1] [SNU1040]                                                                                                                                                                                             | p.D558A [1] [DMS53]<br>p.S26G [1] [KM12]<br>p.L31P [1] [SKNAS]<br>p.S153T [1] [SNU175]                                                                                                                                                                                                                | p.S925F [1] [HCT15]<br>p.A750T [1] [MFE319]<br>p.A1030V [1] [SNU1040]<br>p.A342V [1] [UACC257]                                                                                                                                                                                      |
| KIAA1549 | p.A1471V [1] [2313287]<br>p.A1218E [1] [A498]<br>p.E342K [1] [ECGI10]<br>p.M1869I [1] [HH]<br>p.A1530T [1] [KCL22]<br>p.S664F [1] [LN229]<br>p.R1473W [1] [MFE319]<br>p.S1751L [1] [OPM2]<br>p.H1834N [1] [RL]<br>p.V1879M [1] [SNU1040]<br>p.V1879M [1] [SNU423]<br>p.R477H [1] [SNUC5] | p.K565E [1] [A101D]<br>p.P204S [1] [COLO679]<br>p.K1307E [1] [HCC1806]<br>p.S1689I [1] [HOS]<br>p.P1452H [1] [KMH2]<br>p.Y1515H [1] [LNCAPCLONEFGC]<br>p.R477H [1] [NCIH2172]<br>p.L443V [1] [PC14]<br>p.P428S [1] [SKMEL2]<br>p.P361L [1] [SNU1040]<br>p.P1879L [1] [SNU449]<br>p.P893L [1] [SW1783] | p.T1726A [1] [A204]<br>p.R1162M [1] [DB]<br>p.T948A [1] [HCC202]<br>p.A1681P [1] [HSC3]<br>p.L988F [1] [KMH2]<br>p.P1674S [1] [MELHO]<br>p.A488S [1] [NCIH23]<br>p.R477H [1] [RCHACV]<br>p.D336N [1] [SKMEL30]<br>p.Y368H [1] [SNU175]<br>p.A1681P [1] [SNU81]<br>p.P636S [1] [TE6] |
| KIT      | p.T232M [1] [2313287]<br>p.D159N [1] [HDLM2]<br>p.T232M [1] [KYSE450]<br>p.R946P [1] [NCIH650]                                                                                                                                                                                           | p.D910Y [1] [AM38]<br>p.G510A [1] [KMH2]<br>p.Q21P [1] [LU65]<br>p.T520S [1] [SIGM5]                                                                                                                                                                                                                  | p.A701S [1] [BV173]<br>p.D266N [1] [KYSE270]<br>p.K626R [1] [MDAMB415]                                                                                                                                                                                                              |
| KRAS     | p.G12D [1] [ISHIKAWAHERAKLIO02ER]                                                                                                                                                                                                                                                        | p.M188V [1] [KP4]                                                                                                                                                                                                                                                                                     | p.Q61H [1] [SJSA1]                                                                                                                                                                                                                                                                  |
| KTN1     | p.T631A [1] [AM38]<br>p.Q481P [1] [FU97]<br>p.T631A [1] [IALM]<br>p.K1077R [1] [NCIH1048]<br>p.T631A [1] [RERFGC1B]<br>p.T631A [1] [TE5]                                                                                                                                                 | p.S243N [1] [CW2]<br>p.T631A [1] [FU97]<br>p.T631A [1] [KMS12BM]<br>p.T631A [1] [NUGC3]<br>p.A91V [1] [RL952]<br>p.T631A [1] [TE6]                                                                                                                                                                    | p.T631A [1] [ECC12]<br>p.T631A [1] [HUPT4]<br>p.T631A [1] [MOLP8]<br>p.L841I [1] [OVK18]<br>p.A342T [1] [SNU1040]                                                                                                                                                                   |
| LASP1    | p.A215P [1] [JHH7]<br>p.R197H [1] [SNU1040]                                                                                                                                                                                                                                              | p.V232M [1] [LOVO]<br>p.G132C [1] [SNU175]                                                                                                                                                                                                                                                            | p.D217N [1] [OE19]<br>p.A66V [1] [TOV21G]                                                                                                                                                                                                                                           |
| LCK      | p.T87S [1] [CORL95]                                                                                                                                                                                                                                                                      | p.E467D [1] [CW2]                                                                                                                                                                                                                                                                                     | p.E448Q [1] [KYSE510]                                                                                                                                                                                                                                                               |
| LCP1     | p.T150M [1] [OVCAR8]                                                                                                                                                                                                                                                                     |                                                                                                                                                                                                                                                                                                       |                                                                                                                                                                                                                                                                                     |
| LHFP     | p.A169T [1] [LS180]                                                                                                                                                                                                                                                                      | p.H55N [1] [NCIH2087]                                                                                                                                                                                                                                                                                 | p.Q60K [1] [T84]                                                                                                                                                                                                                                                                    |
| LIFR     | p.N1035H [1] [BV173]<br>p.R932H [1] [HT115]<br>p.L493F [1] [NCIH460]<br>p.N426D [1] [SNU1040]                                                                                                                                                                                            | p.V81A [1] [EB2]<br>p.V658I [1] [KYSE70]<br>p.D602G [1] [PF382]<br>p.E319K [1] [SNU81]                                                                                                                                                                                                                | p.H528Y [1] [HCT15]<br>p.V658I [1] [LU65]<br>p.V380I [1] [RL952]                                                                                                                                                                                                                    |
| LMO1     | p.E160K [1] [HT115]                                                                                                                                                                                                                                                                      |                                                                                                                                                                                                                                                                                                       |                                                                                                                                                                                                                                                                                     |

|        |                                                                                                      |                                                                                        |                                                                               |
|--------|------------------------------------------------------------------------------------------------------|----------------------------------------------------------------------------------------|-------------------------------------------------------------------------------|
| LPP    | p.G62R [1] [CW2]<br>p.K540N [1] [LS411N]<br>p.P342R [1] [SW1088]                                     | p.G197R [1] [GI1]<br>p.G336V [1] [SHP77]                                               | p.P407S [1] [KMS11]<br>p.R22W [1] [SNU407]                                    |
| LYL1   | p.T273P [1] [HT]                                                                                     | p.R131W [1] [KM12]                                                                     |                                                                               |
| MAF    | p.A51T [1] [CL34]<br>p.S354N [1] [OCIAML5]                                                           | p.D40N [1] [CL34]<br>p.S354N [1] [S117]                                                | p.S354N [1] [DAUDI]                                                           |
| MAFB   | p.A309V [1] [HCT15]<br>p.S74N [1] [SNU1040]                                                          | p.L239M [1] [KM12]                                                                     | p.I274F [1] [ONS76]                                                           |
| MALT1  | p.H778R [1] [BFTC909]<br>p.R296Q [1] [SNU81]                                                         | p.M732T [1] [SBC5]                                                                     | p.P768S [1] [SNU1040]                                                         |
| MAML2  | p.S421N [1] [CW2]<br>p.T459A [1] [HCT15]<br>p.R552C [1] [MHHCALL4]                                   | p.S1010P [1] [EFM19]<br>p.S226N [1] [KM12]<br>p.R207C [1] [SNU81]                      | p.I700V [1] [HCC1569]<br>p.P304H [1] [LNCAPCLONEFGC]<br>p.N1154S [1] [SUDHL1] |
| MAP2K1 | p.V85I [1] [DND41]<br>p.K185T [1] [LS411N]<br>p.Q56P [1] [SW1573]                                    | p.Q56P [1] [KPNYN]<br>p.A158T [1] [SKOV3]                                              | p.Q56P [1] [LNCAPCLONEFGC]<br>p.R160K [1] [SKOV3]                             |
| MAP2K2 | p.V86L [1] [CAS1]<br>p.P298L [1] [NCIH647]                                                           | p.R238W [1] [COLO680N]<br>p.I115V [1] [SNU1040]                                        | p.P301A [1] [MDAMB361]<br>p.E148Q [1] [TE11]                                  |
| MAP2K4 | p.P338L [1] [HCC1569]                                                                                |                                                                                        |                                                                               |
| MAX    | p.R60Q [1] [CAL51]                                                                                   | p.R33Q [1] [CAMA1]                                                                     |                                                                               |
| MDM2   | p.L315F [1] [COLO741]                                                                                | p.E204G [1] [MOLT13]                                                                   | p.S425N [1] [SAOS2]                                                           |
| MDM4   | p.S127T [1] [DAUDI]<br>p.R87C [1] [JHH1]<br>p.I130F [1] [OCIAML5]                                    | p.I130F [1] [DAUDI]<br>p.R87C [1] [KYSE70]<br>p.Q135R [1] [OCIAML5]                    | p.Q135R [1] [DAUDI]<br>p.S127T [1] [OCIAML5]                                  |
| MDS2   | p.G61E [1] [FU97]<br>p.R80C [1] [SJRH30]                                                             | p.G61E [1] [JEKO1]                                                                     | p.P67H [1] [MDAMB415]                                                         |
| MEN1   | p.R131C [1] [NCIH2342]                                                                               | p.G156S [1] [NCIH596]                                                                  | p.R456H [1] [SNU1040]                                                         |
| MET    | p.P472S [1] [CHL1]<br>p.A954V [1] [LNCAPCLONEFGC]<br>p.D946H [1] [MDAMB415]<br>p.V122D [1] [SNU1040] | p.E493K [1] [CHL1]<br>p.W1338L [1] [LOUCY]<br>p.P366S [1] [MEWO]<br>p.V1007I [1] [TE9] | p.M636V [1] [HUPT3]<br>p.E34K [1] [LS513]<br>p.V13L [1] [NCIH1838]            |
| MITF   | p.V320I [1] [5637]<br>p.Y18C [1] [HUH7]<br>p.P75A [1] [OCIAML5]<br>p.V251M [1] [SNU1040]             | p.S52T [1] [DAUDI]<br>p.Y253C [1] [KMH2]<br>p.T94M [1] [PF382]                         | p.P91A [1] [DAUDI]<br>p.T403P [1] [L1236]<br>p.R40H [1] [SNU1040]             |
| MKL1   | p.N741Y [1] [AGS]<br>p.S335L [1] [OCIAML2]<br>p.R813H [1] [SNU1040]                                  | p.C783Y [1] [MFE319]<br>p.P647S [1] [RD]<br>p.L642R [1] [SNU283]                       | p.S744L [1] [NCIH2009]<br>p.P656H [1] [RL952]<br>p.A801T [1] [TGBC11TKB]      |
| MLF1   | p.M1K [1] [ECC10]                                                                                    | p.H158Y [1] [RPMI8402]                                                                 |                                                                               |
| MLH1   | p.V152M [1] [CW2]<br>p.L582V [1] [KATOIII]<br>p.L400V [1] [NCIH2342]<br>p.V201A [1] [SAOS2]          | p.A120S [1] [HCT15]<br>p.G189D [1] [LNCAPCLONEFGC]<br>p.G373A [1] [NCIH660]            | p.A586V [1] [IGROV1]<br>p.R659L [1] [MEWO]<br>p.R10L [1] [RMGI]               |
| MLL    | p.A1122D [1] [CMLT1]                                                                                 | p.V2335A [1] [COLO741]                                                                 | p.E898D [1] [DAUDI]                                                           |

|        |                                                                                                                                                                                                                                                                                                                                                                                                                                                                                                                                                                                                                                                                                                                                                                                                                                                                                                                                                                                                                                                                                                                                                                                                                                                       |                                                                                                                                                                                                                                                                                                                                                                                                                                                                                                                                                                                                                                                                                                                                                                                                                                                                                                                                                                                                                                                                                                                                                                                                                                                        |                                                                                                                                                                                                                                                                                                                                                                                                                                                                                                                                                                                                                                                                                                                                                                                                                                                                                                                                                                                                                                                                                                                                                                                                                                                                   |
|--------|-------------------------------------------------------------------------------------------------------------------------------------------------------------------------------------------------------------------------------------------------------------------------------------------------------------------------------------------------------------------------------------------------------------------------------------------------------------------------------------------------------------------------------------------------------------------------------------------------------------------------------------------------------------------------------------------------------------------------------------------------------------------------------------------------------------------------------------------------------------------------------------------------------------------------------------------------------------------------------------------------------------------------------------------------------------------------------------------------------------------------------------------------------------------------------------------------------------------------------------------------------|--------------------------------------------------------------------------------------------------------------------------------------------------------------------------------------------------------------------------------------------------------------------------------------------------------------------------------------------------------------------------------------------------------------------------------------------------------------------------------------------------------------------------------------------------------------------------------------------------------------------------------------------------------------------------------------------------------------------------------------------------------------------------------------------------------------------------------------------------------------------------------------------------------------------------------------------------------------------------------------------------------------------------------------------------------------------------------------------------------------------------------------------------------------------------------------------------------------------------------------------------------|-------------------------------------------------------------------------------------------------------------------------------------------------------------------------------------------------------------------------------------------------------------------------------------------------------------------------------------------------------------------------------------------------------------------------------------------------------------------------------------------------------------------------------------------------------------------------------------------------------------------------------------------------------------------------------------------------------------------------------------------------------------------------------------------------------------------------------------------------------------------------------------------------------------------------------------------------------------------------------------------------------------------------------------------------------------------------------------------------------------------------------------------------------------------------------------------------------------------------------------------------------------------|
|        | <p>p.V917A [1] [DAUDI]<br/> p.T972N [1] [DAUDI]<br/> p.S2105R [1] [DND41]<br/> p.M2418V [1] [HSC2]<br/> p.W3649L [1] [LNCAPCLONEFGC]<br/> p.K2434E [1] [NCIH1836]<br/> p.L2874F [1] [SNGM]</p>                                                                                                                                                                                                                                                                                                                                                                                                                                                                                                                                                                                                                                                                                                                                                                                                                                                                                                                                                                                                                                                        | <p>p.A922G [1] [DAUDI]<br/> p.T993A [1] [DAUDI]<br/> p.D1573N [1] [HCC56]<br/> p.E1725D [1] [KATOIII]<br/> p.T401K [1] [MDAMB231]<br/> p.N524S [1] [NMCG1]</p>                                                                                                                                                                                                                                                                                                                                                                                                                                                                                                                                                                                                                                                                                                                                                                                                                                                                                                                                                                                                                                                                                         | <p>p.T958A [1] [DAUDI]<br/> p.S3107P [1] [DAUDI]<br/> p.D2840E [1] [HCT15]<br/> p.T3510A [1] [KM12]<br/> p.A3440T [1] [MM1S]<br/> p.T2269A [1] [PF382]</p>                                                                                                                                                                                                                                                                                                                                                                                                                                                                                                                                                                                                                                                                                                                                                                                                                                                                                                                                                                                                                                                                                                        |
| MLL3   | <p>p.S321N [1] [8505C]<br/> p.C394Y [1] [A3KAW]<br/> p.A970T [1] [AN3CA]<br/> p.P871H [1] [CAL12T]<br/> p.E3924K [1] [CORL88]<br/> p.C748Y [1] [CW2]<br/> p.I331V [1] [CW2]<br/> p.T3279A [1] [DND41]<br/> p.D332G [1] [EB2]<br/> p.P792T [1] [ECC12]<br/> p.S2585F [1] [EVSAT]<br/> p.R866W [1] [GC1Y]<br/> p.A878V [1] [HARA]<br/> p.C391Y [1] [HCC15]<br/> p.P1141S [1] [HCC70]<br/> p.S3543N [1] [HCT15]<br/> p.H850P [1] [HSC3]<br/> p.C394Y [1] [HUPT4]<br/> p.C394Y [1] [JEKO1]<br/> p.R907Q [1] [KG1]<br/> p.D355V [1] [KO52]<br/> p.S321N [1] [KYSE150]<br/> p.C394Y [1] [KYSE150]<br/> p.A286E [1] [LOUNH91]<br/> p.G972R [1] [MEWO]<br/> p.M741T [1] [MOLM13]<br/> p.N393K [1] [NAMALWA]<br/> p.G900V [1] [NCIH1437]<br/> p.S349R [1] [NCIH2030]<br/> p.T360N [1] [NCIH2087]<br/> p.V4703I [1] [NCIH2170]<br/> p.A286E [1] [NCIH508]<br/> p.I991N [1] [NCIH69]<br/> p.K992N [1] [NCIH810]<br/> p.A314P [1] [NMCG1]<br/> p.L1794V [1] [OVCAR4]<br/> p.R4594G [1] [PF382]<br/> p.K2797R [1] [RKO]<br/> p.V962A [1] [RL952]<br/> p.C344S [1] [SKHEP1]<br/> p.R4597H [1] [SNU1040]<br/> p.D3457N [1] [SNU175]<br/> p.L804V [1] [SUPB15]<br/> p.D4103N [1] [SW1088]<br/> p.M796I [1] [SW48]<br/> p.E1521K [1] [TE8]<br/> p.C394Y [1] [THP1]</p> | <p>p.L998F [1] [A2058]<br/> p.S842Y [1] [A673]<br/> p.C1090F [1] [BEN]<br/> p.S349R [1] [CAL33]<br/> p.A312E [1] [CORL88]<br/> p.A561T [1] [CW2]<br/> p.N3923T [1] [DAUDI]<br/> p.G315V [1] [DU145]<br/> p.T831S [1] [ECC10]<br/> p.S321N [1] [ECC12]<br/> p.A1531V [1] [FTC133]<br/> p.C394Y [1] [GC1Y]<br/> p.P801H [1] [HCC15]<br/> p.E1096D [1] [HCC1569]<br/> p.A779T [1] [HCC70]<br/> p.M741T [1] [HGC27]<br/> p.V749A [1] [HT115]<br/> p.K2797E [1] [IGROV1]<br/> p.C394Y [1] [JHH1]<br/> p.Y4161S [1] [KMH2]<br/> p.C394Y [1] [KU1919]<br/> p.S769L [1] [KYSE180]<br/> p.A779V [1] [LN18]<br/> p.K2797R [1] [LOVO]<br/> p.P787L [1] [MEWO]<br/> p.C394Y [1] [MOLM13]<br/> p.K2797R [1] [NCIH1048]<br/> p.Y366N [1] [NCIH1437]<br/> p.P986A [1] [NCIH2066]<br/> p.A976T [1] [NCIH211]<br/> p.P840A [1] [NCIH2342]<br/> p.S978C [1] [NCIH520]<br/> p.V920L [1] [NCIH69]<br/> p.P377T [1] [NCIH810]<br/> p.L326V [1] [NUGC3]<br/> p.S321N [1] [OVISE]<br/> p.Q2394R [1] [PF382]<br/> p.C391Y [1] [RKO]<br/> p.A976T [1] [RT4]<br/> p.P3644S [1] [SKNSH]<br/> p.S777N [1] [SNU1040]<br/> p.C298Y [1] [SNU407]<br/> p.P2468S [1] [SUPHD1]<br/> p.V405M [1] [SW1088]<br/> p.P309L [1] [SW837]<br/> p.S1336C [1] [TE9]<br/> p.P871T [1] [UACC257]</p> | <p>p.Q982E [1] [A2058]<br/> p.C394Y [1] [AM38]<br/> p.S2472G [1] [C2BBE1]<br/> p.T316N [1] [CAL51]<br/> p.R4608H [1] [CORL95]<br/> p.C394Y [1] [CW2]<br/> p.P1426T [1] [DAUDI]<br/> p.C362F [1] [EB2]<br/> p.S769L [1] [ECC10]<br/> p.D355V [1] [EFM192A]<br/> p.S763L [1] [FUOV1]<br/> p.C394Y [1] [GMS10]<br/> p.A779T [1] [HCC15]<br/> p.R380H [1] [HCC1806]<br/> p.G363D [1] [HCT116]<br/> p.H367L [1] [HS746T]<br/> p.F357L [1] [HT115]<br/> p.C391F [1] [IM95]<br/> p.C394Y [1] [KALS1]<br/> p.S321N [1] [KMRC1]<br/> p.P2485S [1] [KYSE150]<br/> p.G972E [1] [KYSE410]<br/> p.G964D [1] [LOUCY]<br/> p.S1883P [1] [MEWO]<br/> p.P335R [1] [MHNNB11]<br/> p.M3329I [1] [MOLT13]<br/> p.T361I [1] [NCIH1048]<br/> p.A976T [1] [NCIH1793]<br/> p.L378V [1] [NCIH2081]<br/> p.T361I [1] [NCIH2110]<br/> p.C748F [1] [NCIH441]<br/> p.K843R [1] [NCIH522]<br/> p.H322N [1] [NCIH69]<br/> p.C359R [1] [NCIH810]<br/> p.N393S [1] [OCIAML5]<br/> p.C394Y [1] [PC14]<br/> p.C394Y [1] [RKN]<br/> p.V692D [1] [RL]<br/> p.T376I [1] [SCABER]<br/> p.S321N [1] [SKUT1]<br/> p.E712G [1] [SNU1040]<br/> p.R3077C [1] [SNU81]<br/> p.V4115G [1] [SW1088]<br/> p.A286E [1] [SW1710]<br/> p.H330N [1] [T98G]<br/> p.A374V [1] [TGBC11TKB]<br/> p.P1141S [1] [VMCUB1]</p> |
| MLLT1  | <p>p.P127H [1] [22RV1]<br/> p.N520I [1] [HCT15]<br/> p.R548C [1] [SNU1040]</p>                                                                                                                                                                                                                                                                                                                                                                                                                                                                                                                                                                                                                                                                                                                                                                                                                                                                                                                                                                                                                                                                                                                                                                        | <p>p.P113L [1] [A2058]<br/> p.P156S [1] [LNCAPCLONEFGC]</p>                                                                                                                                                                                                                                                                                                                                                                                                                                                                                                                                                                                                                                                                                                                                                                                                                                                                                                                                                                                                                                                                                                                                                                                            | <p>p.L539F [1] [CW2]<br/> p.R504Q [1] [REH]</p>                                                                                                                                                                                                                                                                                                                                                                                                                                                                                                                                                                                                                                                                                                                                                                                                                                                                                                                                                                                                                                                                                                                                                                                                                   |
| MLLT10 | <p>p.S142P [1] [CMLT1]<br/> p.T310A [1] [DAUDI]<br/> p.V117I [1] [HCT15]<br/> p.S494L [1] [MDAMB361]</p>                                                                                                                                                                                                                                                                                                                                                                                                                                                                                                                                                                                                                                                                                                                                                                                                                                                                                                                                                                                                                                                                                                                                              | <p>p.D213E [1] [DAUDI]<br/> p.D385E [1] [EFO21]<br/> p.A1036V [1] [HCT15]<br/> p.Q657R [1] [OPM2]</p>                                                                                                                                                                                                                                                                                                                                                                                                                                                                                                                                                                                                                                                                                                                                                                                                                                                                                                                                                                                                                                                                                                                                                  | <p>p.T286A [1] [DAUDI]<br/> p.S219F [1] [HCC78]<br/> p.G602W [1] [JHH7]<br/> p.M21T [1] [PF382]</p>                                                                                                                                                                                                                                                                                                                                                                                                                                                                                                                                                                                                                                                                                                                                                                                                                                                                                                                                                                                                                                                                                                                                                               |



|       |                                                                                                                                           |                                                                                                                                             |                                                                                                                                                           |
|-------|-------------------------------------------------------------------------------------------------------------------------------------------|---------------------------------------------------------------------------------------------------------------------------------------------|-----------------------------------------------------------------------------------------------------------------------------------------------------------|
|       | p.D155V [1] [SKM1]                                                                                                                        | p.R173H [1] [SNU81]                                                                                                                         | p.I167V [1] [VMRCRCZ]                                                                                                                                     |
| MLLT3 | p.T351M [1] [CMLT1]<br>p.E231D [1] [DND41]<br>p.F89L [1] [SW1463]                                                                         | p.R298G [1] [COLO684]<br>p.P265A [1] [OCIAML5]                                                                                              | p.E231D [1] [DAUDI]<br>p.E231D [1] [OCIAML5]                                                                                                              |
| MLLT4 | p.R224Q [1] [639V]<br>p.L286V [1] [CMK]<br>p.L358M [1] [ISTMES1]<br>p.A76V [1] [NCIH1436]<br>p.K311R [1] [SNGM]<br>p.A1331T [1] [SNU1040] | p.S1023L [1] [639V]<br>p.A1646D [1] [HCT15]<br>p.R829S [1] [KMH2]<br>p.L1541V [1] [RCHACV]<br>p.Y406H [1] [SNU1040]<br>p.I524V [1] [SNU423] | p.V1357A [1] [CCK81]<br>p.P1602L [1] [IPC298]<br>p.Y1481C [1] [LNCAPCLONEFGC]<br>p.T1430S [1] [RPMI8226]<br>p.T1195M [1] [SNU1040]<br>p.R976H [1] [SNUC5] |
| MLLT6 | p.G691S [1] [CAL851]                                                                                                                      | p.R659L [1] [DU145]                                                                                                                         |                                                                                                                                                           |
| MN1   | p.A1091T [1] [HARA]<br>p.G821S [1] [KYSE150]<br>p.P1099S [1] [SNU1040]<br>p.R73P [1] [SUDHL1]                                             | p.A54V [1] [HT115]<br>p.G42R [1] [LS180]<br>p.G900S [1] [SNU1040]<br>p.Q1193R [1] [TE8]                                                     | p.M1229K [1] [KM12]<br>p.P121R [1] [NCIH650]<br>p.A837T [1] [SNU1040]                                                                                     |
| MPL   | p.L582P [1] [AN3CA]<br>p.V501L [1] [LNCAPCLONEFGC]<br>p.D128E [1] [SJRH30]<br>p.A21S [1] [SW1463]                                         | p.P372T [1] [CMLT1]<br>p.L571P [1] [MFE319]<br>p.R123Q [1] [SNU81]                                                                          | p.G238D [1] [KM12]<br>p.A490G [1] [NCIH2452]<br>p.W4R [1] [SUDHL1]                                                                                        |
| MSH2  | p.R243Q [1] [CL40]<br>p.M688I [1] [HUPT3]<br>p.M663T [1] [MFE319]                                                                         | p.Q910K [1] [DMS114]<br>p.S124F [1] [KMH2]<br>p.R382H [1] [NCIH1755]                                                                        | p.S723F [1] [HCC1599]<br>p.M688I [1] [LU65]<br>p.T788S [1] [SKUT1]                                                                                        |
| MSH6  | p.A1055T [1] [A704]<br>p.R644T [1] [EB2]<br>p.V800A [1] [HT]<br>p.R1068Q [1] [OCILY19]                                                    | p.P1087A [1] [CHAGOK1]<br>p.G685S [1] [FTC133]<br>p.G141D [1] [MEG01]<br>p.T727S [1] [OVCAR8]                                               | p.A1055T [1] [CW2]<br>p.D1255N [1] [HCC1395]<br>p.T1085N [1] [NCIH1581]<br>p.A1055T [1] [SNU1040]                                                         |
| MSN   | p.Q480H [1] [DAUDI]                                                                                                                       | p.L218M [1] [IGROV1]                                                                                                                        | p.A148T [1] [NCIH1048]                                                                                                                                    |
| MTCP1 | p.G3E [1] [NCIH2228]                                                                                                                      | p.R36H [1] [T47D]                                                                                                                           |                                                                                                                                                           |
| MUC1  | p.T204A [1] [EN]<br>p.G32C [1] [HCT15]<br>p.T197S [1] [LS411N]<br>p.S28I [1] [OE19]<br>p.V201F [1] [RPMI8226]                             | p.P134A [1] [HCC2157]<br>p.R206Q [1] [HT115]<br>p.P122L [1] [NCIH1563]<br>p.R235H [1] [PF382]<br>p.L196H [1] [SNU1040]                      | p.P3L [1] [HCT116]<br>p.G89D [1] [KYSE70]<br>p.P82S [1] [NCIH1568]<br>p.L108P [1] [RKO]<br>p.R235C [1] [SW620]                                            |
| MUTYH | p.R361C [1] [AN3CA]<br>p.S343L [1] [NCIH1693]<br>p.V231M [1] [SF295]<br>p.A330S [1] [SNU175]                                              | p.T461A [1] [CCK81]<br>p.P331A [1] [OAW28]<br>p.Y177H [1] [SJSA1]                                                                           | p.Q335R [1] [LOUCY]<br>p.R434Q [1] [RPMI8226]<br>p.G53R [1] [SNU1040]                                                                                     |
| MYB   | p.H219Y [1] [IGROV1]<br>p.T570A [1] [SNU1040]                                                                                             | p.P316Q [1] [NCIH1648]                                                                                                                      | p.M620I [1] [NCIH661]                                                                                                                                     |
| MYC   | p.S203N [1] [A3KAW]<br>p.V5A [1] [NAMALWA]<br>p.C300Y [1] [PF382]<br>p.T8S [1] [ST486]                                                    | p.V7M [1] [EB2]<br>p.S6R [1] [NUDUL1]<br>p.P2S [1] [RAJI]<br>p.Q10H [1] [SUDHL8]                                                            | p.S344T [1] [GI1]<br>p.S182T [1] [NUDUL1]<br>p.V5A [1] [RAJI]                                                                                             |
| MYCL1 | p.P250L [1] [FUOV1]                                                                                                                       |                                                                                                                                             |                                                                                                                                                           |
| MYCN  | p.I277F [1] [639V]<br>p.P57H [1] [HCT15]                                                                                                  | p.L61P [1] [AN3CA]<br>p.P237L [1] [RT112]                                                                                                   | p.G103C [1] [CW2]<br>p.E270Q [1] [ZR7530]                                                                                                                 |
| MYD88 | p.D288E [1] [HS766T]<br>p.K128N [1] [SNUC5]                                                                                               | p.R301C [1] [SNU1040]<br>p.A146T [1] [SW1088]                                                                                               | p.V52M [1] [SNUC5]                                                                                                                                        |

|       |                                                                                                                                                                                                                                                                                                                                                                                                                                                                                                                                                                |                                                                                                                                                                                                                                                                                                                                                                                                                                                                                                                                                 |                                                                                                                                                                                                                                                                                                                                                                                                                                                                                                                                                 |
|-------|----------------------------------------------------------------------------------------------------------------------------------------------------------------------------------------------------------------------------------------------------------------------------------------------------------------------------------------------------------------------------------------------------------------------------------------------------------------------------------------------------------------------------------------------------------------|-------------------------------------------------------------------------------------------------------------------------------------------------------------------------------------------------------------------------------------------------------------------------------------------------------------------------------------------------------------------------------------------------------------------------------------------------------------------------------------------------------------------------------------------------|-------------------------------------------------------------------------------------------------------------------------------------------------------------------------------------------------------------------------------------------------------------------------------------------------------------------------------------------------------------------------------------------------------------------------------------------------------------------------------------------------------------------------------------------------|
| MYH11 | p.L1456F [1] [BL41]<br>p.E986D [1] [KS1]<br>p.K979N [1] [NCIH716]<br>p.A815T [1] [SNU1040]                                                                                                                                                                                                                                                                                                                                                                                                                                                                     | p.A1204V [1] [G402]<br>p.V252I [1] [MFE319]<br>p.A1616T [1] [NUGC3]<br>p.D10N [1] [SNU1040]                                                                                                                                                                                                                                                                                                                                                                                                                                                     | p.R910Q [1] [HCC1569]<br>p.K1284Q [1] [NCIH2087]<br>p.C823Y [1] [RL952]                                                                                                                                                                                                                                                                                                                                                                                                                                                                         |
| MYH9  | p.A5P [1] [AU565]<br>p.Q1501H [1] [MOGGUVVW]<br>p.R1124H [1] [PF382]<br>p.A363V [1] [SNU1040]                                                                                                                                                                                                                                                                                                                                                                                                                                                                  | p.L1394P [1] [ISHIKAWAHERAKLIO02ER]<br>p.Q1314H [1] [NCIH2066]<br>p.R1612Q [1] [SNU1040]<br>p.R802W [1] [SNU175]                                                                                                                                                                                                                                                                                                                                                                                                                                | p.M809T [1] [L1236]<br>p.S364Y [1] [ONS76]<br>p.R693H [1] [SNU1040]                                                                                                                                                                                                                                                                                                                                                                                                                                                                             |
| MYST4 | p.E1081D [1] [8305C]<br>p.E741A [1] [BT20]<br>p.P1241H [1] [CAL51]<br>p.N364S [1] [DAUDI]<br>p.I413T [1] [DAUDI]<br>p.T2030S [1] [DAUDI]<br>p.D394H [1] [DND41]<br>p.D1415Y [1] [EFM19]<br>p.P496L [1] [GCT]<br>p.K1250N [1] [HCT15]<br>p.P1973S [1] [HCT15]<br>p.S1229G [1] [KS1]<br>p.V1748I [1] [LS513]<br>p.S1625N [1] [MEWO]<br>p.E1081D [1] [NCIH1436]<br>p.G1134C [1] [NCIH23]<br>p.D394H [1] [OCIAML5]<br>p.G2044A [1] [OCIAML5]<br>p.T1960A [1] [PF382]<br>p.S417T [1] [SIGM5]<br>p.R1033G [1] [SNU423]<br>p.M311L [1] [TE4]<br>p.S1924Y [1] [ZR7530] | p.V1180A [1] [AGS]<br>p.D1077E [1] [BT20]<br>p.E1096K [1] [COLO792]<br>p.C381S [1] [DAUDI]<br>p.T416S [1] [DAUDI]<br>p.G2044A [1] [DAUDI]<br>p.I413T [1] [DND41]<br>p.Y1274C [1] [EN]<br>p.T1525I [1] [HCT116]<br>p.K1490N [1] [HCT15]<br>p.E1081D [1] [HS940T]<br>p.S423C [1] [L428]<br>p.V1545I [1] [LXF289]<br>p.E1373G [1] [MFE319]<br>p.Q1628K [1] [NCIH1755]<br>p.N364S [1] [OCIAML5]<br>p.I413T [1] [OCIAML5]<br>p.E1081D [1] [P31FUJ]<br>p.S189G [1] [RL952]<br>p.A35V [1] [SNU1040]<br>p.P1126T [1] [SUDHL10]<br>p.S1770G [1] [TOV21G] | p.S1229G [1] [BFTC905]<br>p.S1850F [1] [CAL29]<br>p.A1976V [1] [CW2]<br>p.D394H [1] [DAUDI]<br>p.S1717N [1] [DAUDI]<br>p.C381S [1] [DND41]<br>p.T416S [1] [DND41]<br>p.M2002V [1] [EN]<br>p.L945I [1] [HCT15]<br>p.A1635V [1] [HCT15]<br>p.K1243R [1] [KP3]<br>p.A1563V [1] [LS411N]<br>p.E1206K [1] [MDAMB453]<br>p.Q1916H [1] [NCIH1435]<br>p.G656R [1] [NCIH1975]<br>p.C381S [1] [OCIAML5]<br>p.T416S [1] [OCIAML5]<br>p.E1081D [1] [PANC0203]<br>p.L547I [1] [SCC4]<br>p.A1403T [1] [SNU1040]<br>p.A114T [1] [TE11]<br>p.R594T [1] [ZR7530] |
| NACA  | p.R77W [1] [KYSE410]                                                                                                                                                                                                                                                                                                                                                                                                                                                                                                                                           | p.V190A [1] [SNU1040]                                                                                                                                                                                                                                                                                                                                                                                                                                                                                                                           |                                                                                                                                                                                                                                                                                                                                                                                                                                                                                                                                                 |
| NCOA1 | p.N585S [1] [EN]<br>p.N1244S [1] [NCIH1792]<br>p.V519I [1] [SKMEL1]                                                                                                                                                                                                                                                                                                                                                                                                                                                                                            | p.P1180L [1] [JHH2]<br>p.Y533D [1] [OCUM1]<br>p.L1366F [1] [SUPHD1]                                                                                                                                                                                                                                                                                                                                                                                                                                                                             | p.G1423E [1] [MIAPACA2]<br>p.R35L [1] [RPMI7951]                                                                                                                                                                                                                                                                                                                                                                                                                                                                                                |
| NCOA2 | p.D714E [1] [DAUDI]<br>p.N401S [1] [DAUDI]<br>p.V256A [1] [HCC1569]<br>p.Y1148C [1] [NCIH1876]<br>p.S533P [1] [SNU1040]                                                                                                                                                                                                                                                                                                                                                                                                                                        | p.I427M [1] [DAUDI]<br>p.T390A [1] [DAUDI]<br>p.A14E [1] [HS746T]<br>p.A231T [1] [NCIH1876]<br>p.R491H [1] [SNU1040]                                                                                                                                                                                                                                                                                                                                                                                                                            | p.S420G [1] [DAUDI]<br>p.G941S [1] [HARA]<br>p.P823Q [1] [LNCAPCLONEFGC]<br>p.E718V [1] [PF382]                                                                                                                                                                                                                                                                                                                                                                                                                                                 |
| NCOA4 | p.D554E [1] [DEL]<br>p.E219G [1] [SNU1040]                                                                                                                                                                                                                                                                                                                                                                                                                                                                                                                     | p.R52W [1] [IGROV1]                                                                                                                                                                                                                                                                                                                                                                                                                                                                                                                             | p.S396C [1] [NCIH2227]                                                                                                                                                                                                                                                                                                                                                                                                                                                                                                                          |
| NF1   | p.E1720D [1] [A4FUK]<br>p.D2635Y [1] [KALS1]<br>p.M376I [1] [LNCAPCLONEFGC]<br>p.E1720D [1] [MOLM13]                                                                                                                                                                                                                                                                                                                                                                                                                                                           | p.K1385R [1] [DAUDI]<br>p.N1054H [1] [KG1]<br>p.L585V [1] [MELJUSO]<br>p.K1385R [1] [OCIAML5]                                                                                                                                                                                                                                                                                                                                                                                                                                                   | p.V2096L [1] [EJM]<br>p.S1470N [1] [KYSE150]<br>p.N1054H [1] [MIAPACA2]                                                                                                                                                                                                                                                                                                                                                                                                                                                                         |
| NF2   | p.A489P [1] [MPP89]                                                                                                                                                                                                                                                                                                                                                                                                                                                                                                                                            | p.P135L [1] [SNGM]                                                                                                                                                                                                                                                                                                                                                                                                                                                                                                                              |                                                                                                                                                                                                                                                                                                                                                                                                                                                                                                                                                 |
| NFKB2 | p.L20W [1] [EPLC272H]<br>p.A286T [1] [SNU1040]                                                                                                                                                                                                                                                                                                                                                                                                                                                                                                                 | p.L653P [1] [MC116]<br>p.R339Q [1] [SNU1040]                                                                                                                                                                                                                                                                                                                                                                                                                                                                                                    | p.D714N [1] [PANC0813]<br>p.R685H [1] [SNU1040]                                                                                                                                                                                                                                                                                                                                                                                                                                                                                                 |
| NIN   | p.R845C [1] [2313287]<br>p.R1639Q [1] [FTC133]<br>p.S826F [1] [KYSE270]<br>p.G1632V [1] [LS1034]                                                                                                                                                                                                                                                                                                                                                                                                                                                               | p.H1148Y [1] [CAL62]<br>p.D383Y [1] [HT55]<br>p.Q923R [1] [LNCAPCLONEFGC]<br>p.G844E [1] [NCIH1568]                                                                                                                                                                                                                                                                                                                                                                                                                                             | p.N1889S [1] [CAPAN1]<br>p.N87S [1] [KMH2]<br>p.C197F [1] [LP1]<br>p.R2058S [1] [NCIH1651]                                                                                                                                                                                                                                                                                                                                                                                                                                                      |

|        |                                                                                                                                                                                                                                                                                              |                                                                                                                                                                                                                                                                                     |                                                                                                                                                                                                                                                                                           |
|--------|----------------------------------------------------------------------------------------------------------------------------------------------------------------------------------------------------------------------------------------------------------------------------------------------|-------------------------------------------------------------------------------------------------------------------------------------------------------------------------------------------------------------------------------------------------------------------------------------|-------------------------------------------------------------------------------------------------------------------------------------------------------------------------------------------------------------------------------------------------------------------------------------------|
|        | p.K1253R [1] [SHP77]<br>p.T1145A [1] [SNU1040]                                                                                                                                                                                                                                               | p.A1747V [1] [SNU1040]<br>p.G283E [1] [SNU1040]                                                                                                                                                                                                                                     | p.A1666V [1] [SNU1040]<br>p.R952K [1] [SNUC5]                                                                                                                                                                                                                                             |
| NONO   | p.A404T [1] [MDST8]<br>p.R287H [1] [SNU175]                                                                                                                                                                                                                                                  | p.I192V [1] [OVK18]                                                                                                                                                                                                                                                                 | p.D422G [1] [SNU1040]                                                                                                                                                                                                                                                                     |
| NOTCH1 | p.R2096H [1] [639V]<br>p.P2439L [1] [CCK81]<br>p.S2216L [1] [EFO21]<br>p.D620Y [1] [HCC2157]<br>p.G1196R [1] [KCL22]<br>p.G115D [1] [KYSE450]<br>p.Q1194H [1] [NCIH1666]<br>p.D1874Y [1] [NCIH2227]<br>p.S458P [1] [REH]<br>p.M1961T [1] [SNU1040]<br>p.G1789S [1] [SW48]                    | p.G2246R [1] [BT483]<br>p.G1320R [1] [CW2]<br>p.R2096C [1] [EN]<br>p.G1196R [1] [HCT116]<br>p.R2264Q [1] [KP2]<br>p.E851K [1] [MDAMB361]<br>p.N1485S [1] [NCIH1755]<br>p.P2098L [1] [RCHACV]<br>p.Q2344R [1] [RKO]<br>p.C988W [1] [SNU1040]                                         | p.H2126Q [1] [C3A]<br>p.R1963S [1] [DND41]<br>p.G1216D [1] [HCC1954]<br>p.P916L [1] [HCT116]<br>p.M2057T [1] [KYSE450]<br>p.N816Y [1] [NCIH1651]<br>p.R880Q [1] [NCIH2030]<br>p.S2524L [1] [REH]<br>p.T2372S [1] [RPMI8226]<br>p.R1855H [1] [SNU175]                                      |
| NOTCH2 | p.T89M [1] [DMS273]<br>p.A88V [1] [HCT15]<br>p.M2005V [1] [LS411N]<br>p.N2465S [1] [SCABER]<br>p.C482Y [1] [SNU1040]<br>p.C2328R [1] [SNU407]                                                                                                                                                | p.R72C [1] [EHEB]<br>p.Q1634E [1] [HSC2]<br>p.P919T [1] [MDAMB436]<br>p.R65Q [1] [SNGM]<br>p.C79R [1] [SNU1040]<br>p.R1895H [1] [TE11]                                                                                                                                              | p.C41S [1] [HCT116]<br>p.S1445N [1] [KM12]<br>p.R318H [1] [NALM6]<br>p.Y2264C [1] [SNU1040]<br>p.A1903V [1] [SNU175]<br>p.V1759A [1] [U87MG]                                                                                                                                              |
| NPM1   | p.R277W [1] [IGROV1]                                                                                                                                                                                                                                                                         | p.N210S [1] [KALS1]                                                                                                                                                                                                                                                                 |                                                                                                                                                                                                                                                                                           |
| NR4A3  | p.E169K [1] [FTC133]<br>p.G176S [1] [RCHACV]                                                                                                                                                                                                                                                 | p.M428I [1] [KYSE150]<br>p.N79D [1] [SNU1040]                                                                                                                                                                                                                                       | p.Q332R [1] [LNCAPCLONEFGC]                                                                                                                                                                                                                                                               |
| NRAS   | p.Q61R [1] [HS940T]<br>p.Q61K [1] [KYSE270]<br>p.Q61K [1] [SW1088]                                                                                                                                                                                                                           | p.Q61K [1] [JUN3]<br>p.Q61K [1] [NCIH1876]                                                                                                                                                                                                                                          | p.Q61R [1] [KMH2]<br>p.Q61K [1] [SJSA1]                                                                                                                                                                                                                                                   |
| NSD1   | p.A1260S [1] [CHAGOK1]<br>p.N586S [1] [CORL88]<br>p.T109S [1] [DAUDI]<br>p.K204E [1] [DAUDI]<br>p.T197P [1] [DND41]<br>p.R1844K [1] [HSC2]<br>p.A1843V [1] [KCL22]<br>p.E176K [1] [MOLT13]<br>p.P1006S [1] [NCIH841]<br>p.C158G [1] [OCIAML5]<br>p.M1094T [1] [RKO]<br>p.A1649T [1] [SNU398] | p.A487V [1] [CL34]<br>p.N88S [1] [DAUDI]<br>p.C158G [1] [DAUDI]<br>p.T109S [1] [DND41]<br>p.Q1302R [1] [HCC1569]<br>p.H515L [1] [HT]<br>p.A1779S [1] [L363]<br>p.T2356M [1] [MOLT13]<br>p.N88S [1] [OCIAML5]<br>p.R389T [1] [OCIAML5]<br>p.E657D [1] [SCC4]<br>p.R1079K [1] [SNU81] | p.M1038V [1] [COLO680N]<br>p.E101A [1] [DAUDI]<br>p.T197P [1] [DAUDI]<br>p.C158G [1] [DND41]<br>p.W2625C [1] [HCT15]<br>p.S131T [1] [JHH6]<br>p.N674S [1] [LU65]<br>p.I652V [1] [NCIH650]<br>p.T109S [1] [OCIAML5]<br>p.G1536S [1] [PF382]<br>p.H1991Y [1] [SNU1040]<br>p.S2338R [1] [TT] |
| NTRK1  | p.A107V [1] [2313287]<br>p.T434M [1] [KYSE150]<br>p.A454V [1] [NCIH1944]                                                                                                                                                                                                                     | p.R314H [1] [639V]<br>p.V420M [1] [LOXIMVI]<br>p.P149L [1] [NCIH650]                                                                                                                                                                                                                | p.M671T [1] [FTC133]<br>p.R33W [1] [NCIH1048]<br>p.R28W [1] [SNUC5]                                                                                                                                                                                                                       |
| NTRK3  | p.N714S [1] [A204]<br>p.P586S [1] [DAUDI]<br>p.Q249L [1] [KP2]<br>p.T404M [1] [NALM6]<br>p.Y555C [1] [NCIH2030]<br>p.M567T [1] [PF382]<br>p.R343Q [1] [SNU175]<br>p.G587R [1] [TGBC11TKB]                                                                                                    | p.V451I [1] [CAL51]<br>p.E566D [1] [DAUDI]<br>p.H610Y [1] [KYSE270]<br>p.S215G [1] [NCIH1435]<br>p.H677Y [1] [NCIH2087]<br>p.T734I [1] [SNU1040]<br>p.R89H [1] [SNU81]                                                                                                              | p.T490M [1] [CAPAN2]<br>p.D535N [1] [HCT15]<br>p.G595D [1] [MDST8]<br>p.V307L [1] [NCIH1437]<br>p.E223D [1] [NCIH727]<br>p.R645H [1] [SNU1040]<br>p.R306C [1] [SW1783]                                                                                                                    |
| NUMA1  | p.R454Q [1] [CL11]<br>p.L789V [1] [KLE]<br>p.S2082R [1] [NCIH1563]<br>p.A627T [1] [SNU1040]                                                                                                                                                                                                  | p.T1851A [1] [HCC366]<br>p.D231N [1] [LNCAPCLONEFGC]<br>p.R180H [1] [RCHACV]<br>p.R1490H [1] [SW48]                                                                                                                                                                                 | p.T1057M [1] [HCT15]<br>p.S682A [1] [NB4]<br>p.R1877H [1] [SNU1040]<br>p.G493E [1] [TE4]                                                                                                                                                                                                  |

|          |                                                                                                                                                                                   |                                                                                                                                                                                  |                                                                                                                                                                                  |
|----------|-----------------------------------------------------------------------------------------------------------------------------------------------------------------------------------|----------------------------------------------------------------------------------------------------------------------------------------------------------------------------------|----------------------------------------------------------------------------------------------------------------------------------------------------------------------------------|
|          | p.P402L [1] [TYKNU]                                                                                                                                                               |                                                                                                                                                                                  |                                                                                                                                                                                  |
| NUP214   | p.P1591S [1] [CMLT1]<br>p.V1609I [1] [HCC1806]<br>p.T533A [1] [KYM1]<br>p.L1320F [1] [NCIH2170]<br>p.R815Q [1] [SNU1040]<br>p.A1656P [1] [YAPC]                                   | p.P1986L [1] [CMLT1]<br>p.M1487V [1] [IGROV1]<br>p.V562M [1] [LS411N]<br>p.I570V [1] [NCIH841]<br>p.A1302V [1] [SNU1040]                                                         | p.H928L [1] [CW2]<br>p.M363V [1] [KARPAS299]<br>p.E225G [1] [MFE319]<br>p.S898L [1] [SKLMS1]<br>p.A1254T [1] [TOV21G]                                                            |
| NUP98    | p.A450V [1] [8MGBA]<br>p.T456S [1] [DAUDI]<br>p.Q296P [1] [DAUDI]<br>p.F357V [1] [KYSE450]<br>p.D1242E [1] [RCHACV]<br>p.T99A [1] [TC71]                                          | p.A210V [1] [CMLT1]<br>p.S375T [1] [DAUDI]<br>p.F130I [1] [FUOV1]<br>p.T168N [1] [NCIH647]<br>p.E1783K [1] [SUPHD1]                                                              | p.T459I [1] [DAUDI]<br>p.I308L [1] [DAUDI]<br>p.R834S [1] [IGROV1]<br>p.T456M [1] [INUGC3]<br>p.R599H [1] [SW1573]                                                               |
| OLIG2    | p.N125K [1] [CW2]<br>p.S88A [1] [OCUM1]<br>p.T151M [1] [TGBC11TKB]                                                                                                                | p.V8M [1] [FUOV1]<br>p.S88A [1] [RKO]                                                                                                                                            | p.P141H [1] [JHH7]<br>p.D18H [1] [RL952]                                                                                                                                         |
| OMD      | p.G52R [1] [CMLT1]                                                                                                                                                                | p.E102D [1] [DAUDI]                                                                                                                                                              | p.Y97N [1] [DAUDI]                                                                                                                                                               |
| PAFAH1B2 | p.N70H [1] [MDAMB436]                                                                                                                                                             |                                                                                                                                                                                  |                                                                                                                                                                                  |
| PALB2    | p.S652N [1] [BFTC905]<br>p.C933S [1] [DND41]<br>p.T720A [1] [HDLM2]<br>p.Y743C [1] [JHOS4]<br>p.Q460R [1] [KP2]<br>p.S64L [1] [MIAPACA2]<br>p.Y743C [1] [TYKNU]                   | p.T733A [1] [CCK81]<br>p.L199F [1] [EN]<br>p.A590V [1] [HT]<br>p.S310G [1] [KARPAS620]<br>p.Q460R [1] [KYSE140]<br>p.Q460R [1] [RERFLCKJ]                                        | p.H553Y [1] [CMLT1]<br>p.E645K [1] [HCC78]<br>p.E554K [1] [HT115]<br>p.Y743C [1] [KMS11]<br>p.V560L [1] [MCF7]<br>p.A491T [1] [SKUT1]                                            |
| PAX3     | p.R270C [1] [DU145]                                                                                                                                                               | p.R56C [1] [SNGM]                                                                                                                                                                | p.R271C [1] [SU8686]                                                                                                                                                             |
| PAX5     | p.L366I [1] [DMS79]<br>p.S269L [1] [MDAMB453]                                                                                                                                     | p.R197H [1] [DU145]<br>p.S292N [1] [RCHACV]                                                                                                                                      | p.D227H [1] [MCF7]<br>p.A271T [1] [SNU175]                                                                                                                                       |
| PAX7     | p.A282V [1] [BV173]<br>p.G412S [1] [KU1919]<br>p.G412S [1] [OPM2]<br>p.Y495C [1] [TE6]                                                                                            | p.G412S [1] [FUOV1]<br>p.A354G [1] [NCIH446]<br>p.Y495C [1] [SNU175]<br>p.G412S [1] [TE8]                                                                                        | p.G17W [1] [HCT116]<br>p.G412S [1] [ONS76]<br>p.K486R [1] [SW1271]<br>p.A395V [1] [TGBC11TKB]                                                                                    |
| PAX8     | p.P2T [1] [EN]<br>p.A189T [1] [SNU1040]<br>p.D273N [1] [UACC893]                                                                                                                  | p.Y95H [1] [HCC1569]<br>p.L208Q [1] [SUDHL8]<br>p.P346L [1] [VMRCLCD]                                                                                                            | p.P235S [1] [MEWO]<br>p.G338R [1] [SW837]                                                                                                                                        |
| PBX1     | p.S391I [1] [CW2]                                                                                                                                                                 | p.A365V [1] [HCC1569]                                                                                                                                                            |                                                                                                                                                                                  |
| PCM1     | p.G1759R [1] [FADU]<br>p.R28S [1] [NCIH2196]<br>p.P1106S [1] [RERFGC1B]                                                                                                           | p.V1763I [1] [MFE319]<br>p.P80S [1] [OSRC2]<br>p.R163G [1] [SNU1040]                                                                                                             | p.R1907P [1] [MPP89]<br>p.L856P [1] [PF382]<br>p.T949I [1] [SNU1040]                                                                                                             |
| PCSK7    | p.Q393H [1] [AU565]<br>p.G603R [1] [NCIH1703]<br>p.D221N [1] [SNU1040]                                                                                                            | p.G614D [1] [HCT15]<br>p.E733K [1] [NCIH358]                                                                                                                                     | p.G358E [1] [HUPT3]<br>p.I385S [1] [NCIH660]                                                                                                                                     |
| PDE4DIP  | p.R622Q [1] [22RV1]<br>p.R32S [1] [CA46]<br>p.M472T [1] [CL11]<br>p.D132V [1] [CW2]<br>p.R490W [1] [ECC10]<br>p.M1254V [1] [HCC1569]<br>p.P2100T [1] [HCT15]<br>p.P42S [1] [HSC3] | p.D997G [1] [AMO1]<br>p.N2174S [1] [CAL12T]<br>p.H445Y [1] [COLO679]<br>p.R901G [1] [DAUDI]<br>p.V361A [1] [EN]<br>p.L1994R [1] [HCC56]<br>p.R10G [1] [HDMYZ]<br>p.E67G [1] [HT] | p.S9C [1] [BEN]<br>p.H152R [1] [CAL851]<br>p.D103G [1] [COLO684]<br>p.R6H [1] [DND41]<br>p.E354K [1] [ESS1]<br>p.R524C [1] [HCC56]<br>p.Q2074H [1] [HGC27]<br>p.A124V [1] [HT29] |

|        |                                                                                                                                                                                                                                                                                                                                                                                                                                                                                                                                                                                       |                                                                                                                                                                                                                                                                                                                                                                                                                                                                                                                                                                            |                                                                                                                                                                                                                                                                                                                                                                                                                                                                                                                                                                           |
|--------|---------------------------------------------------------------------------------------------------------------------------------------------------------------------------------------------------------------------------------------------------------------------------------------------------------------------------------------------------------------------------------------------------------------------------------------------------------------------------------------------------------------------------------------------------------------------------------------|----------------------------------------------------------------------------------------------------------------------------------------------------------------------------------------------------------------------------------------------------------------------------------------------------------------------------------------------------------------------------------------------------------------------------------------------------------------------------------------------------------------------------------------------------------------------------|---------------------------------------------------------------------------------------------------------------------------------------------------------------------------------------------------------------------------------------------------------------------------------------------------------------------------------------------------------------------------------------------------------------------------------------------------------------------------------------------------------------------------------------------------------------------------|
|        | <p>p.R1199H [1] [IGROV1]<br/> p.N1455D [1] [IM95]<br/> p.L1781F [1] [LNCAPCLONEFGC]<br/> p.S989P [1] [LS411N]<br/> p.R1881C [1] [MDAMB361]<br/> p.D1985N [1] [MFE319]<br/> p.Y80S [1] [MOLP8]<br/> p.R34Q [1] [NCIH1436]<br/> p.L2005H [1] [NCIH2110]<br/> p.E1147K [1] [NCIH226]<br/> p.E122K [1] [NCIH441]<br/> p.P134H [1] [NCIH508]<br/> p.E1464G [1] [PF382]<br/> p.R855Q [1] [RS411]<br/> p.G2064E [1] [SH4]<br/> p.L353S [1] [SKMEL1]<br/> p.P1203L [1] [SNU1040]<br/> p.S529P [1] [SNU1040]<br/> p.V349L [1] [SNU175]<br/> p.A124V [1] [T98G]<br/> p.S2213G [1] [UACC812]</p> | <p>p.E798G [1] [IGROV1]<br/> p.R490W [1] [KNS42]<br/> p.V109M [1] [LOUCY]<br/> p.R1148T [1] [MCF7]<br/> p.S552Y [1] [MDAMB415]<br/> p.T2098A [1] [MHHNB11]<br/> p.H441Y [1] [MONOMAC6]<br/> p.I76V [1] [NCIH1581]<br/> p.G2150R [1] [NCIH2141]<br/> p.I206V [1] [NCIH2342]<br/> p.L2282M [1] [NCIH446]<br/> p.T46P [1] [NUGC4]<br/> p.P30A [1] [RKN]<br/> p.I303F [1] [SCC9]<br/> p.R60Q [1] [SKLU1]<br/> p.R1912Q [1] [SNU1040]<br/> p.R1021M [1] [SNU1040]<br/> p.G156D [1] [SNU1040]<br/> p.A2303T [1] [SNU407]<br/> p.Q2075H [1] [TC71]<br/> p.R478H [1] [UACC812]</p> | <p>p.R194W [1] [IGROV1]<br/> p.V379I [1] [KNS62]<br/> p.C1901F [1] [LS123]<br/> p.S203L [1] [MDAMB231]<br/> p.E947K [1] [MFE296]<br/> p.E468D [1] [MHHNB11]<br/> p.R1226H [1] [NALM6]<br/> p.P326L [1] [NCIH1650]<br/> p.P2141T [1] [NCIH2172]<br/> p.R60G [1] [NCIH2342]<br/> p.S2309R [1] [NCIH460]<br/> p.Q2037R [1] [PF382]<br/> p.C8Y [1] [RL952]<br/> p.P1675S [1] [SF295]<br/> p.T125K [1] [SKM1]<br/> p.R1343Q [1] [SNU1040]<br/> p.E564G [1] [SNU1040]<br/> p.A94V [1] [SNU1040]<br/> p.N2302T [1] [SNUC5]<br/> p.R490W [1] [TE6]<br/> p.E152D [1] [VMRCRCW]</p> |
| PDGFB  | <p>p.P26L [1] [AN3CA]</p>                                                                                                                                                                                                                                                                                                                                                                                                                                                                                                                                                             | <p>p.E237V [1] [CAL78]</p>                                                                                                                                                                                                                                                                                                                                                                                                                                                                                                                                                 | <p>p.A58V [1] [HDLM2]</p>                                                                                                                                                                                                                                                                                                                                                                                                                                                                                                                                                 |
| PDGFRA | <p>p.G614E [1] [CHL1]<br/> p.V484M [1] [HT144]<br/> p.S348Y [1] [NCIH1105]<br/> p.L710M [1] [NCIH2172]<br/> p.P6Q [1] [SHP77]</p>                                                                                                                                                                                                                                                                                                                                                                                                                                                     | <p>p.N35D [1] [COLO668]<br/> p.K630N [1] [KMR1]<br/> p.A491T [1] [NCIH1876]<br/> p.L324F [1] [NCIH2228]<br/> p.R487H [1] [SNU1040]</p>                                                                                                                                                                                                                                                                                                                                                                                                                                     | <p>p.D173N [1] [HT115]<br/> p.G426V [1] [MCF7]<br/> p.T99S [1] [NCIH211]<br/> p.S285T [1] [OCIM1]</p>                                                                                                                                                                                                                                                                                                                                                                                                                                                                     |
| PDGFRB | <p>p.R853W [1] [22RV1]<br/> p.A916V [1] [HCC1806]<br/> p.E312K [1] [LK2]</p>                                                                                                                                                                                                                                                                                                                                                                                                                                                                                                          | <p>p.P345Q [1] [CHAGOK1]<br/> p.V311I [1] [HH]<br/> p.T369M [1] [LS180]</p>                                                                                                                                                                                                                                                                                                                                                                                                                                                                                                | <p>p.I679N [1] [CW2]<br/> p.V84M [1] [KMS11]<br/> p.R256W [1] [TOV21G]</p>                                                                                                                                                                                                                                                                                                                                                                                                                                                                                                |
| PER1   | <p>p.P859H [1] [22RV1]<br/> p.P737L [1] [HCT15]<br/> p.R15G [1] [KCL22]<br/> p.R1140H [1] [PF382]<br/> p.A999V [1] [SNU1040]<br/> p.S654C [1] [SW1088]<br/> p.M1152V [1] [TT]</p>                                                                                                                                                                                                                                                                                                                                                                                                     | <p>p.R1195W [1] [HCC1419]<br/> p.P260A [1] [JHOS4]<br/> p.R576P [1] [LS513]<br/> p.K735E [1] [PF382]<br/> p.R246W [1] [SNU175]<br/> p.S1207N [1] [SW48]</p>                                                                                                                                                                                                                                                                                                                                                                                                                | <p>p.G513V [1] [HCC202]<br/> p.D746A [1] [KARPAS299]<br/> p.M1231I [1] [NCIH1693]<br/> p.R243C [1] [SKUT1]<br/> p.E1252K [1] [SNU407]<br/> p.M918V [1] [T98G]</p>                                                                                                                                                                                                                                                                                                                                                                                                         |
| PHOX2B | <p>p.R158C [1] [MOLT16]<br/> p.A187D [1] [RERFLCSQ1]</p>                                                                                                                                                                                                                                                                                                                                                                                                                                                                                                                              | <p>p.D177G [1] [NALM6]</p>                                                                                                                                                                                                                                                                                                                                                                                                                                                                                                                                                 | <p>p.R154C [1] [NCIH2228]</p>                                                                                                                                                                                                                                                                                                                                                                                                                                                                                                                                             |
| PICALM | <p>p.S645P [1] [RKO]</p>                                                                                                                                                                                                                                                                                                                                                                                                                                                                                                                                                              | <p>p.P360S [1] [SNU1040]</p>                                                                                                                                                                                                                                                                                                                                                                                                                                                                                                                                               | <p>p.L106V [1] [SW948]</p>                                                                                                                                                                                                                                                                                                                                                                                                                                                                                                                                                |
| PIK3CA | <p>p.F666L [1] [EN]<br/> p.E542K [1] [NCIH1563]</p>                                                                                                                                                                                                                                                                                                                                                                                                                                                                                                                                   | <p>p.E545K [1] [HSC4]<br/> p.C420R [1] [OVI5E]</p>                                                                                                                                                                                                                                                                                                                                                                                                                                                                                                                         | <p>p.R770Q [1] [HT115]<br/> p.K111E [1] [SW1573]</p>                                                                                                                                                                                                                                                                                                                                                                                                                                                                                                                      |
| PIK3R1 | <p>p.R557Q [1] [AN3CA]<br/> p.D464E [1] [GAMG]<br/> p.D10H [1] [KYSE520]<br/> p.L647P [1] [SNU1040]</p>                                                                                                                                                                                                                                                                                                                                                                                                                                                                               | <p>p.K561Q [1] [AN3CA]<br/> p.R461G [1] [ISHIKAWAHERAKLIO02ER]<br/> p.N527Y [1] [NB1]<br/> p.Y580D [1] [SUDHL6]</p>                                                                                                                                                                                                                                                                                                                                                                                                                                                        | <p>p.N260S [1] [EN]<br/> p.Y470D [1] [ISHIKAWAHERAKLIO02ER]<br/> p.Y14F [1] [NCIH841]</p>                                                                                                                                                                                                                                                                                                                                                                                                                                                                                 |
| PIM1   | <p>p.C158Y [1] [REH]</p>                                                                                                                                                                                                                                                                                                                                                                                                                                                                                                                                                              | <p>p.T23A [1] [SKOV3]</p>                                                                                                                                                                                                                                                                                                                                                                                                                                                                                                                                                  |                                                                                                                                                                                                                                                                                                                                                                                                                                                                                                                                                                           |
| PLAG1  | <p>p.Q66H [1] [DAUDI]<br/> p.T28S [1] [DAUDI]<br/> p.T28S [1] [DND41]<br/> p.D115N [1] [HCC2218]<br/> p.I65T [1] [OCIAMLS]<br/> p.V18A [1] [OCIAMLS]</p>                                                                                                                                                                                                                                                                                                                                                                                                                              | <p>p.I65T [1] [DAUDI]<br/> p.V18A [1] [DAUDI]<br/> p.V18A [1] [DND41]<br/> p.E448K [1] [KYSE150]<br/> p.Y54F [1] [OCIAMLS]</p>                                                                                                                                                                                                                                                                                                                                                                                                                                             | <p>p.Y54F [1] [DAUDI]<br/> p.Y54F [1] [DND41]<br/> p.L398F [1] [EBC1]<br/> p.Q66H [1] [OCIAMLS]<br/> p.T28S [1] [OCIAMLS]</p>                                                                                                                                                                                                                                                                                                                                                                                                                                             |

|         |                                                                                                                                                                                                                                                            |                                                                                                                                                                                                                                                                   |                                                                                                                                                                                                                                     |
|---------|------------------------------------------------------------------------------------------------------------------------------------------------------------------------------------------------------------------------------------------------------------|-------------------------------------------------------------------------------------------------------------------------------------------------------------------------------------------------------------------------------------------------------------------|-------------------------------------------------------------------------------------------------------------------------------------------------------------------------------------------------------------------------------------|
| PML     | p.P525L [1] [A704]<br>p.A271T [1] [CW2]<br>p.A802T [1] [ES2]<br>p.R680W [1] [HT115]<br>p.L711M [1] [KM12]<br>p.E794V [1] [MOLT13]<br>p.G789V [1] [NCIH1734]<br>p.R648C [1] [NCIH358]<br>p.E423D [1] [SNU1040]<br>p.R656C [1] [SNU1040]<br>p.P67R [1] [TE9] | p.A300V [1] [CCK81]<br>p.G738V [1] [DMS114]<br>p.P624S [1] [HSC2]<br>p.A125V [1] [IGROV1]<br>p.Q646L [1] [KNS62]<br>p.Y305C [1] [NALM6]<br>p.P813L [1] [NCIH2172]<br>p.V265I [1] [OVK18]<br>p.V532I [1] [SNU1040]<br>p.L674S [1] [SNU407]<br>p.G727E [1] [WMM115] | p.R424K [1] [COLO792]<br>p.P526T [1] [EN]<br>p.S388T [1] [HSC3]<br>p.C57Y [1] [KCL22]<br>p.R737W [1] [LP1]<br>p.P696S [1] [NALM6]<br>p.E363K [1] [NCIH2342]<br>p.R670H [1] [SKMEL5]<br>p.V545M [1] [SNU1040]<br>p.A601T [1] [SW620] |
| PMS1    | p.P749T [1] [CAS1]<br>p.N371T [1] [JHH7]                                                                                                                                                                                                                   | p.A304S [1] [DU145]<br>p.S467L [1] [MELHO]                                                                                                                                                                                                                        | p.R500M [1] [EFO27]<br>p.T465A [1] [SNUC5]                                                                                                                                                                                          |
| PMS2    | p.E710D [1] [MDAMB453]<br>p.L594F [1] [NCIH69]<br>p.A129V [1] [SNU1040]                                                                                                                                                                                    | p.A572T [1] [NALM6]<br>p.S587N [1] [SKMEL2]<br>p.H88Y [1] [SW1271]                                                                                                                                                                                                | p.D60E [1] [NCIH520]<br>p.A725V [1] [SNU1040]                                                                                                                                                                                       |
| POU2AF1 | p.P15S [1] [DU145]                                                                                                                                                                                                                                         |                                                                                                                                                                                                                                                                   |                                                                                                                                                                                                                                     |
| POU5F1  | p.R33W [1] [KATOIII]                                                                                                                                                                                                                                       | p.S336L [1] [SNGM]                                                                                                                                                                                                                                                |                                                                                                                                                                                                                                     |
| PPARG   | p.V90I [1] [2313287]                                                                                                                                                                                                                                       |                                                                                                                                                                                                                                                                   |                                                                                                                                                                                                                                     |
| PRCC    | p.E281D [1] [DAUDI]                                                                                                                                                                                                                                        | p.T297A [1] [HCC1419]                                                                                                                                                                                                                                             | p.S209L [1] [HCT116]                                                                                                                                                                                                                |
| PRDM16  | p.R970K [1] [A4FUK]<br>p.G651C [1] [HCT15]<br>p.G651S [1] [KARPAS620]<br>p.G638C [1] [LNCAPCLONEFGC]<br>p.S889Y [1] [OCIAML5]<br>p.D1101Y [1] [RL952]<br>p.A643S [1] [SNUC5]                                                                               | p.Q187H [1] [BCPAP]<br>p.A7V [1] [IGROV1]<br>p.S475F [1] [KM12]<br>p.A509T [1] [MC116]<br>p.M43V [1] [OCIM1]<br>p.T686M [1] [SNU1040]<br>p.D236N [1] [SUDHL1]                                                                                                     | p.C1225Y [1] [CW2]<br>p.L716M [1] [JIN3]<br>p.A724V [1] [KM12]<br>p.P526S [1] [NCIH716]<br>p.L260V [1] [REH]<br>p.F729S [1] [SNU1040]                                                                                               |
| PRKAR1A | p.T163I [1] [KYSE180]                                                                                                                                                                                                                                      | p.D33N [1] [PF382]                                                                                                                                                                                                                                                |                                                                                                                                                                                                                                     |
| PTEN    | p.L186M [1] [A2058]<br>p.T286N [1] [CAS1]<br>p.T232A [1] [SNU1040]                                                                                                                                                                                         | p.R130P [1] [AN3CA]<br>p.Q245H [1] [MOLT16]<br>p.C250R [1] [SNU1040]                                                                                                                                                                                              | p.W274L [1] [BT549]<br>p.C211S [1] [OSRC2]                                                                                                                                                                                          |
| PTPN11  | p.A72S [1] [GDM1]                                                                                                                                                                                                                                          |                                                                                                                                                                                                                                                                   |                                                                                                                                                                                                                                     |
| PTPRC   | p.S571Y [1] [639V]<br>p.E228A [1] [HCC1143]<br>p.I1165T [1] [IGROV1]<br>p.E327K [1] [LU65]<br>p.R181H [1] [SNU1040]<br>p.K37T [1] [SW1088]                                                                                                                 | p.A129P [1] [A4FUK]<br>p.E1068D [1] [HCT15]<br>p.R415G [1] [KP4]<br>p.T215S [1] [NCIH1838]<br>p.I382S [1] [SNU81]<br>p.E327K [1] [TE9]                                                                                                                            | p.T72S [1] [HCC1143]<br>p.E327K [1] [HSC4]<br>p.A379T [1] [LK2]<br>p.R515H [1] [OV56]<br>p.C331Y [1] [SUDHL6]                                                                                                                       |
| RAC1    | p.D11E [1] [MDST8]                                                                                                                                                                                                                                         | p.A159V [1] [SKUT1]                                                                                                                                                                                                                                               | p.N52I [1] [SNU423]                                                                                                                                                                                                                 |
| RAD21   | p.V94I [1] [639V]<br>p.D343N [1] [KMS12BM]<br>p.S466A [1] [NCIH1048]                                                                                                                                                                                       | p.G408E [1] [DMS53]<br>p.E415K [1] [KYSE70]<br>p.R554S [1] [SJS1A1]                                                                                                                                                                                               | p.R450H [1] [HT115]<br>p.L567F [1] [LS411N]                                                                                                                                                                                         |
| RAF1    | p.A629S [1] [CAL51]<br>p.A389P [1] [HT144]                                                                                                                                                                                                                 | p.V226I [1] [CHAGOK1]<br>p.I330V [1] [SNUC5]                                                                                                                                                                                                                      | p.P614L [1] [FADU]                                                                                                                                                                                                                  |
| RALGDS  | p.P407L [1] [CAL148]<br>p.N640S [1] [NALM6]<br>p.S235P [1] [OVK18]<br>p.R883Q [1] [RS411]<br>p.P554S [1] [SW1417]                                                                                                                                          | p.F592Y [1] [CMLT1]<br>p.R239C [1] [NCIH1915]<br>p.R452Q [1] [PF382]<br>p.Y525H [1] [SNU1040]<br>p.A603T [1] [TGBC11TKB]                                                                                                                                          | p.A356V [1] [FTC133]<br>p.E472G [1] [OAW28]<br>p.R553Q [1] [RERFGC1B]<br>p.E472K [1] [SUPHD1]                                                                                                                                       |

|          |                                                                                                                                                                                                                            |                                                                                                                                                                                                                       |                                                                                                                                                                                     |
|----------|----------------------------------------------------------------------------------------------------------------------------------------------------------------------------------------------------------------------------|-----------------------------------------------------------------------------------------------------------------------------------------------------------------------------------------------------------------------|-------------------------------------------------------------------------------------------------------------------------------------------------------------------------------------|
| RANBP17  | p.N1049S [1] [HCC1569]<br>p.S155F [1] [MDAMB415]<br>p.L428F [1] [SNU283]                                                                                                                                                   | p.T482A [1] [HCT15]<br>p.M347T [1] [SKMEL24]                                                                                                                                                                          | p.I307F [1] [HT115]<br>p.A405V [1] [SNU1040]                                                                                                                                        |
| RAP1GDS1 | p.L603F [1] [CW2]<br>p.R83P [1] [RPMI8402]                                                                                                                                                                                 | p.L156M [1] [DAUDI]                                                                                                                                                                                                   | p.M463I [1] [KMH2]                                                                                                                                                                  |
| RARA     | p.S55P [1] [CAK11]<br>p.R370H [1] [ME1]<br>p.R394W [1] [SNU1040]                                                                                                                                                           | p.C143Y [1] [CW2]<br>p.A40T [1] [RL952]<br>p.E3D [1] [SNU81]                                                                                                                                                          | p.A392T [1] [EN]<br>p.R126Q [1] [SNU1040]<br>p.D323N [1] [TE10]                                                                                                                     |
| RB1      | p.D421N [1] [DND41]<br>p.G310E [1] [REH]<br>p.S758L [1] [SNU1040]                                                                                                                                                          | p.F684C [1] [EJM]<br>p.Q575H [1] [SNU1040]                                                                                                                                                                            | p.G310E [1] [KE37]<br>p.T601S [1] [SNU1040]                                                                                                                                         |
| RBM15    | p.V9M [1] [HUPT3]<br>p.T65S [1] [KALS1]<br>p.S77P [1] [OAW28]<br>p.T65S [1] [RERFLCSQ1]                                                                                                                                    | p.L22P [1] [ISHIKAWAHERAKLIO02ER]<br>p.V9M [1] [KNS42]<br>p.K830N [1] [OE21]                                                                                                                                          | p.V9M [1] [JHH6]<br>p.T65S [1] [MKN1]<br>p.V9M [1] [RCM1]                                                                                                                           |
| RECQL4   | p.E295K [1] [BT483]<br>p.S256G [1] [CCK81]<br>p.F1108L [1] [HCC1569]<br>p.R482C [1] [HT115]<br>p.A954V [1] [LNCAPCLONEFGC]<br>p.S178F [1] [NCIH1573]<br>p.V397F [1] [PF382]<br>p.S256I [1] [SKM1]<br>p.R248C [1] [SNU1040] | p.E423K [1] [CAMA1]<br>p.R1182H [1] [COLO684]<br>p.E714V [1] [HCT15]<br>p.P210R [1] [IPC298]<br>p.P92L [1] [MOLT16]<br>p.P169T [1] [NCIH2227]<br>p.P92L [1] [RAJI]<br>p.R1038H [1] [SKMEL28]<br>p.E1094D [1] [SNU175] | p.E928A [1] [CCK81]<br>p.R1017G [1] [CW2]<br>p.A204G [1] [HCT15]<br>p.R262Q [1] [KYSE270]<br>p.G1105R [1] [NB1]<br>p.Q972R [1] [PF382]<br>p.Q1114H [1] [RKO]<br>p.S862L [1] [SKUT1] |
| REL      | p.T553I [1] [CW2]<br>p.S440L [1] [SNU81]                                                                                                                                                                                   | p.I354T [1] [NCIH2342]                                                                                                                                                                                                | p.M477I [1] [SNU175]                                                                                                                                                                |
| RET      | p.T492N [1] [A704]<br>p.V438I [1] [CL34]<br>p.L1101V [1] [DAUDI]<br>p.N151S [1] [HCC33]<br>p.R77H [1] [LNCAPCLONEFGC]<br>p.T152P [1] [NUGC4]<br>p.L1101V [1] [OCIAML5]                                                     | p.A680T [1] [CA46]<br>p.N1084S [1] [DAUDI]<br>p.N1084S [1] [DND41]<br>p.R114H [1] [KU1919]<br>p.A498V [1] [NCIH2228]<br>p.N1084S [1] [OCIAML5]<br>p.M1109T [1] [SKMES1]                                               | p.R77H [1] [CL34]<br>p.P1091A [1] [DAUDI]<br>p.V804M [1] [DU145]<br>p.A217V [1] [KYSE70]<br>p.A281V [1] [NCIH522]<br>p.P1091A [1] [OCIAML5]<br>p.L318M [1] [SNU1040]                |
| ROS1     | p.S1303N [1] [2313287]<br>p.R560H [1] [CAL29]<br>p.Y164H [1] [KALS1]<br>p.T147A [1] [LU65]<br>p.R1311Q [1] [SNU81]<br>p.D725N [1] [YAPC]                                                                                   | p.A642S [1] [A3KAW]<br>p.N1105D [1] [HCC1569]<br>p.L590P [1] [KYSE410]<br>p.V332I [1] [MFE319]<br>p.D725N [1] [SNU81]<br>p.Q1091E [1] [ZR7530]                                                                        | p.N2213K [1] [CADOES1]<br>p.H2310R [1] [ISHIKAWAHERAKLIO02ER]<br>p.K991N [1] [LNCAPCLONEFGC]<br>p.D725N [1] [OVKATE]<br>p.V1223F [1] [TGBC11TKB]                                    |
| RPL22    | p.I70N [1] [KMH2]                                                                                                                                                                                                          | p.E108V [1] [LNCAPCLONEFGC]                                                                                                                                                                                           | p.S66N [1] [SNU1040]                                                                                                                                                                |
| RPN1     | p.D460Y [1] [HGC27]<br>p.T403A [1] [OE19]                                                                                                                                                                                  | p.P223T [1] [HUCCT1]                                                                                                                                                                                                  | p.R278C [1] [OCUM1]                                                                                                                                                                 |
| RUNX1    | p.G69R [1] [ABC1]<br>p.Q264R [1] [HCT15]                                                                                                                                                                                   | p.R207Q [1] [CAL78]<br>p.G309D [1] [SNU1040]                                                                                                                                                                          | p.M267I [1] [HCT116]<br>p.R207Q [1] [SNU1040]                                                                                                                                       |
| SBDS     | p.V130M [1] [SNU1040]                                                                                                                                                                                                      |                                                                                                                                                                                                                       |                                                                                                                                                                                     |
| SDHC     | p.S19N [1] [RL952]                                                                                                                                                                                                         |                                                                                                                                                                                                                       |                                                                                                                                                                                     |
| SDHD     | p.L131R [1] [KYM1]                                                                                                                                                                                                         | p.I31V [1] [SNU1040]                                                                                                                                                                                                  | p.I40M [1] [TE9]                                                                                                                                                                    |
| SEPT6    | p.V37L [1] [BEN]                                                                                                                                                                                                           | p.T292A [1] [DAUDI]                                                                                                                                                                                                   | p.R147G [1] [HS578T]                                                                                                                                                                |

|         |                                                                                                                                                                                                                                      |                                                                                                                                                                                                                          |                                                                                                                                                                                                                   |
|---------|--------------------------------------------------------------------------------------------------------------------------------------------------------------------------------------------------------------------------------------|--------------------------------------------------------------------------------------------------------------------------------------------------------------------------------------------------------------------------|-------------------------------------------------------------------------------------------------------------------------------------------------------------------------------------------------------------------|
|         | p.N428K [1] [SKUT1]                                                                                                                                                                                                                  |                                                                                                                                                                                                                          |                                                                                                                                                                                                                   |
| SET     | p.D235E [1] [CA46]<br>p.E254V [1] [SNU1040]                                                                                                                                                                                          | p.E250K [1] [COLO680N]                                                                                                                                                                                                   | p.E250D [1] [EPLC272H]                                                                                                                                                                                            |
| SFPQ    | p.E290D [1] [IGROV1]                                                                                                                                                                                                                 | p.D406N [1] [NCIH2172]                                                                                                                                                                                                   | p.A318G [1] [SNU1040]                                                                                                                                                                                             |
| SH3GL1  | p.A284T [1] [EBC1]<br>p.A284T [1] [P31FUJ]<br>p.R245W [1] [SNU1040]<br>p.A247V [1] [SNU175]                                                                                                                                          | p.K252N [1] [FADU]<br>p.S216L [1] [RERFLCKJ]<br>p.D169N [1] [SNU1040]<br>p.A24D [1] [TGBC11TKB]                                                                                                                          | p.R227Q [1] [NCIH1793]<br>p.R78W [1] [SNGM]<br>p.R65W [1] [SNU1040]                                                                                                                                               |
| SLC45A3 | p.R251W [1] [FADU]<br>p.R251W [1] [MDAMB231]<br>p.R85H [1] [SNU1040]                                                                                                                                                                 | p.W78C [1] [HCC1419]<br>p.V321I [1] [NALM6]                                                                                                                                                                              | p.L237F [1] [HCC33]<br>p.V304A [1] [REH]                                                                                                                                                                          |
| SMARCA4 | p.R1356W [1] [A2780]<br>p.V420A [1] [CCK81]<br>p.E1364A [1] [CW2]<br>p.G603D [1] [EN]<br>p.E1211V [1] [IGROV1]<br>p.L921F [1] [L428]<br>p.L1138P [1] [PF382]<br>p.A322T [1] [SNGM]<br>p.R905H [1] [SNU1040]<br>p.P647L [1] [VMRCRCW] | p.R885H [1] [CAL51]<br>p.P647L [1] [CCK81]<br>p.D1418E [1] [DAUDI]<br>p.G44E [1] [HDLM2]<br>p.D1416N [1] [IGROV1]<br>p.R726H [1] [LNCAPCLONEFGC]<br>p.R167Q [1] [RL952]<br>p.G256R [1] [SNU1040]<br>p.A379T [1] [SNU175] | p.M27I [1] [CCK81]<br>p.R1445W [1] [CCK81]<br>p.S1409T [1] [DND41]<br>p.N173H [1] [HT115]<br>p.N944K [1] [KYSE150]<br>p.A136V [1] [NUGC3]<br>p.R167W [1] [RS411]<br>p.A778V [1] [SNU1040]<br>p.R466C [1] [SNU407] |
| SMARCB1 | p.R373G [1] [DND41]                                                                                                                                                                                                                  | p.R377H [1] [RCC10RGB]                                                                                                                                                                                                   | p.R377H [1] [TC71]                                                                                                                                                                                                |
| SMO     | p.P698S [1] [GCT]<br>p.E194K [1] [HT115]<br>p.V157M [1] [OCIAML3]                                                                                                                                                                    | p.S574C [1] [HCC1419]<br>p.A729T [1] [KOPN8]<br>p.Y322H [1] [SNGM]                                                                                                                                                       | p.T640A [1] [HCT15]<br>p.G191D [1] [LS411N]<br>p.V195L [1] [SNU407]                                                                                                                                               |
| SOCS1   | p.M119T [1] [KM12]<br>p.K118M [1] [TOV21G]                                                                                                                                                                                           | p.L162R [1] [L1236]                                                                                                                                                                                                      | p.R193C [1] [LN229]                                                                                                                                                                                               |
| SOX2    | p.D176E [1] [DAUDI]                                                                                                                                                                                                                  | p.L119V [1] [HCT116]                                                                                                                                                                                                     |                                                                                                                                                                                                                   |
| SS18    | p.P96R [1] [A704]                                                                                                                                                                                                                    | p.G137R [1] [LNCAPCLONEFGC]                                                                                                                                                                                              | p.H118L [1] [NCIH2347]                                                                                                                                                                                            |
| SS18L1  | p.T111M [1] [CHAGOK1]<br>p.A158T [1] [NCIH2141]<br>p.A215T [1] [SNGM]                                                                                                                                                                | p.P352L [1] [CORL23]<br>p.G392R [1] [RD]<br>p.A322V [1] [SW1417]                                                                                                                                                         | p.Y355C [1] [EFO27]<br>p.G126W [1] [RKN]<br>p.M145I [1] [TE5]                                                                                                                                                     |
| SSX1    | p.G136W [1] [BEN]                                                                                                                                                                                                                    | p.E149G [1] [BT474]                                                                                                                                                                                                      |                                                                                                                                                                                                                   |
| SSX4    | p.A77S [1] [EM2]                                                                                                                                                                                                                     | p.K74N [1] [MSTO211H]                                                                                                                                                                                                    | p.Y31F [1] [NCIH211]                                                                                                                                                                                              |
| STAT3   | p.A555D [1] [LNCAPCLONEFGC]<br>p.L358V [1] [NUGC4]                                                                                                                                                                                   | p.T178P [1] [LS411N]<br>p.V291A [1] [PF382]                                                                                                                                                                              | p.E434K [1] [NCIH2087]<br>p.R729H [1] [SNU1040]                                                                                                                                                                   |
| STAT5B  | p.R290W [1] [AN3CA]<br>p.Q220H [1] [HCT15]<br>p.V46I [1] [OCIAML5]                                                                                                                                                                   | p.V46I [1] [DAUDI]<br>p.G576C [1] [LS411N]                                                                                                                                                                               | p.R295M [1] [HCT15]<br>p.V227M [1] [NALM6]                                                                                                                                                                        |
| STK11   | p.S216F [1] [8505C]<br>p.D194Y [1] [DMS53]<br>p.G242W [1] [NCIH1563]<br>p.K78N [1] [NCIH1944]                                                                                                                                        | p.Y49D [1] [A2058]<br>p.I46T [1] [LS180]<br>p.S216F [1] [NCIH1573]<br>p.M392I [1] [NCIH2030]                                                                                                                             | p.G56V [1] [CHAGOK1]<br>p.G196R [1] [LU65]<br>p.K62N [1] [NCIH1944]<br>p.L105S [1] [SNU1040]                                                                                                                      |
| SUFU    | p.K272R [1] [ISHIKAWAHERAKLIO02ER]<br>p.E367G [1] [SNU1040]                                                                                                                                                                          | p.R289Q [1] [PF382]<br>p.A14S [1] [VMRCLCD]                                                                                                                                                                              | p.E260K [1] [SNU1040]                                                                                                                                                                                             |
| SUZ12   | p.E335D [1] [HT115]                                                                                                                                                                                                                  | p.N698S [1] [LCLC103H]                                                                                                                                                                                                   | p.A66T [1] [MFE280]                                                                                                                                                                                               |



|        |                                                                                                                                                                                                                                                                                 |                                                                                                                                                                                                                                                                 |                                                                                                                                                                                                                                                                          |
|--------|---------------------------------------------------------------------------------------------------------------------------------------------------------------------------------------------------------------------------------------------------------------------------------|-----------------------------------------------------------------------------------------------------------------------------------------------------------------------------------------------------------------------------------------------------------------|--------------------------------------------------------------------------------------------------------------------------------------------------------------------------------------------------------------------------------------------------------------------------|
|        | p.V730A [1] [PF382]                                                                                                                                                                                                                                                             |                                                                                                                                                                                                                                                                 |                                                                                                                                                                                                                                                                          |
| SYK    | p.R497S [1] [A498]<br>p.N358I [1] [PF382]                                                                                                                                                                                                                                       | p.T73P [1] [CL40]<br>p.S3N [1] [SNU1040]                                                                                                                                                                                                                        | p.K363N [1] [HCC1599]                                                                                                                                                                                                                                                    |
| TAF15  | p.R187H [1] [EB2]                                                                                                                                                                                                                                                               | p.Q73E [1] [MDAMB361]                                                                                                                                                                                                                                           | p.R553G [1] [SNU1040]                                                                                                                                                                                                                                                    |
| TAL1   | p.P277T [1] [639V]<br>p.T305M [1] [RMGI]                                                                                                                                                                                                                                        | p.T313A [1] [MFE319]<br>p.P14H [1] [RMGI]                                                                                                                                                                                                                       | p.P171L [1] [NCIH1915]<br>p.G36S [1] [RPMI8402]                                                                                                                                                                                                                          |
| TAL2   | p.T66M [1] [SNU423]                                                                                                                                                                                                                                                             |                                                                                                                                                                                                                                                                 |                                                                                                                                                                                                                                                                          |
| TCEA1  | p.K15R [1] [CW2]                                                                                                                                                                                                                                                                |                                                                                                                                                                                                                                                                 |                                                                                                                                                                                                                                                                          |
| TCF12  | p.I51M [1] [CW2]                                                                                                                                                                                                                                                                | p.T540A [1] [LN18]                                                                                                                                                                                                                                              | p.N662Y [1] [NCIH1436]                                                                                                                                                                                                                                                   |
| TCF3   | p.G451S [1] [CAL148]<br>p.P530R [1] [LS411N]<br>p.K522Q [1] [RCC10RGB]                                                                                                                                                                                                          | p.G437R [1] [JVM2]<br>p.A453T [1] [LS411N]<br>p.T508M [1] [SNU1040]                                                                                                                                                                                             | p.E532K [1] [KCL22]<br>p.P479A [1] [NCIH810]<br>p.D395N [1] [TE8]                                                                                                                                                                                                        |
| TCL1A  | p.E40Q [1] [EJM]                                                                                                                                                                                                                                                                |                                                                                                                                                                                                                                                                 |                                                                                                                                                                                                                                                                          |
| TERT   | p.T866A [1] [639V]<br>p.R960H [1] [DAOY]<br>p.V640M [1] [LS411N]<br>p.A789T [1] [SNU175]                                                                                                                                                                                        | p.D836G [1] [AN3CA]<br>p.V886A [1] [EM2]<br>p.R926L [1] [ONS76]<br>p.E1056K [1] [TE6]                                                                                                                                                                           | p.R731Q [1] [CMLT1]<br>p.E484K [1] [HCT116]<br>p.V639I [1] [RL952]                                                                                                                                                                                                       |
| TET2   | p.P851S [1] [22RV1]<br>p.G1684A [1] [BEN]<br>p.R1253T [1] [DMSS53]<br>p.P1575L [1] [HEL]<br>p.S795G [1] [LNCAPCLONEFGC]<br>p.V1812L [1] [MFE319]<br>p.P29L [1] [NCIH2066]<br>p.R1404Q [1] [NUGC3]<br>p.D1425G [1] [PANC0813]<br>p.R571H [1] [RPMI8402]<br>p.D1277Y [1] [SUDHL5] | p.Y1589C [1] [5637]<br>p.A1810T [1] [CCK81]<br>p.A1443S [1] [EVSAT]<br>p.H658P [1] [HT]<br>p.R881G [1] [MDAMB453]<br>p.R1261H [1] [NALM6]<br>p.N483D [1] [NCIH2172]<br>p.K1905T [1] [OVK18]<br>p.G678D [1] [RKO]<br>p.S1203R [1] [SIGM5]<br>p.L1329M [1] [SW48] | p.P1316L [1] [AGS]<br>p.V1978M [1] [COLO680N]<br>p.H1717N [1] [HCC38]<br>p.K1947N [1] [HT115]<br>p.R1261C [1] [MELJUSO]<br>p.T1980I [1] [NCIH2030]<br>p.R123C [1] [NCIH661]<br>p.G1754S [1] [OVKATE]<br>p.D1981G [1] [RKO]<br>p.S1611Y [1] [SNU81]<br>p.P465L [1] [U2OS] |
| TFE3   | p.P674L [1] [COLO792]<br>p.N486Y [1] [HT55]<br>p.G613V [1] [SKNSH]                                                                                                                                                                                                              | p.G611E [1] [HCC2218]<br>p.S449F [1] [MEWO]<br>p.P609L [1] [SNU398]                                                                                                                                                                                             | p.T722I [1] [HT1080]<br>p.P379L [1] [RS411]<br>p.T444A [1] [ZR7530]                                                                                                                                                                                                      |
| TFEB   | p.N239S [1] [HCC1569]                                                                                                                                                                                                                                                           | p.F425L [1] [NCIH1563]                                                                                                                                                                                                                                          | p.R465W [1] [RL952]                                                                                                                                                                                                                                                      |
| TFG    | p.A251D [1] [KM12]                                                                                                                                                                                                                                                              | p.Q294H [1] [KPNYN]                                                                                                                                                                                                                                             | p.V192A [1] [SNU1040]                                                                                                                                                                                                                                                    |
| TFPT   | p.Q115R [1] [HCT15]<br>p.H35D [1] [MC116]                                                                                                                                                                                                                                       | p.R111W [1] [IALM]<br>p.P183L [1] [RPMI8402]                                                                                                                                                                                                                    | p.R87W [1] [IGROV1]                                                                                                                                                                                                                                                      |
| TFRC   | p.R174H [1] [22RV1]<br>p.T104A [1] [HUCCT1]<br>p.E114D [1] [PATU8902]<br>p.D204A [1] [SUDHL5]<br>p.T104A [1] [TE4]                                                                                                                                                              | p.T104A [1] [ECC10]<br>p.T104A [1] [KURAMOCHI]<br>p.V690I [1] [SNU1040]<br>p.I202L [1] [SUDHL5]                                                                                                                                                                 | p.T376N [1] [FUOV1]<br>p.V598M [1] [LCLC97TM1]<br>p.R121H [1] [SNU1040]<br>p.G661R [1] [SW48]                                                                                                                                                                            |
| THRAP3 | p.G902R [1] [CHL1]                                                                                                                                                                                                                                                              | p.A525G [1] [HCC1569]                                                                                                                                                                                                                                           | p.M453I [1] [SKMES1]                                                                                                                                                                                                                                                     |
| TLX1   | p.L276Q [1] [HT55]                                                                                                                                                                                                                                                              | p.H10Y [1] [IPC298]                                                                                                                                                                                                                                             |                                                                                                                                                                                                                                                                          |
| TLX3   | p.V287L [1] [8305C]<br>p.V287L [1] [ISHIKAWAHERAKLIO02ER]<br>p.V287L [1] [QGP1]                                                                                                                                                                                                 | p.K211R [1] [CW2]<br>p.V287L [1] [KYSE510]<br>p.G40S [1] [REH]                                                                                                                                                                                                  | p.T206M [1] [DND41]<br>p.R138C [1] [PF382]<br>p.A208V [1] [SNU1040]                                                                                                                                                                                                      |

|          |                                                                                                                                                                                                                                                                                                                                                                                                           |                                                                                                                                                                                                                                                                                                                                                                                 |                                                                                                                                                                                                                                                                                                                                                                                             |
|----------|-----------------------------------------------------------------------------------------------------------------------------------------------------------------------------------------------------------------------------------------------------------------------------------------------------------------------------------------------------------------------------------------------------------|---------------------------------------------------------------------------------------------------------------------------------------------------------------------------------------------------------------------------------------------------------------------------------------------------------------------------------------------------------------------------------|---------------------------------------------------------------------------------------------------------------------------------------------------------------------------------------------------------------------------------------------------------------------------------------------------------------------------------------------------------------------------------------------|
| TMPRSS2  | p.Q276R [1] [CAL12T]<br>p.L91P [1] [T98G]                                                                                                                                                                                                                                                                                                                                                                 | p.G141S [1] [H4]                                                                                                                                                                                                                                                                                                                                                                | p.V64F [1] [MDAMB436]                                                                                                                                                                                                                                                                                                                                                                       |
| TNFAIP3  | p.D285V [1] [DMS53]<br>p.N170S [1] [MFE319]<br>p.R706Q [1] [OVK18]<br>p.A523T [1] [SNGM]                                                                                                                                                                                                                                                                                                                  | p.E366D [1] [IM95]<br>p.M669T [1] [MFE319]<br>p.A328T [1] [PF382]<br>p.L92F [1] [SUPHD1]                                                                                                                                                                                                                                                                                        | p.P294A [1] [JHH7]<br>p.G432A [1] [NCIH2110]<br>p.R701H [1] [RKO]<br>p.R569Q [1] [TOV21G]                                                                                                                                                                                                                                                                                                   |
| TNFRSF17 | p.H19Q [1] [JJN3]                                                                                                                                                                                                                                                                                                                                                                                         |                                                                                                                                                                                                                                                                                                                                                                                 |                                                                                                                                                                                                                                                                                                                                                                                             |
| TOP1     | p.H81R [1] [HSC2]<br>p.R405W [1] [SNU1040]<br>p.E517K [1] [SNU1040]                                                                                                                                                                                                                                                                                                                                       | p.D156Y [1] [HT115]<br>p.Y426C [1] [SNU1040]<br>p.K150N [1] [SNU81]                                                                                                                                                                                                                                                                                                             | p.E710D [1] [OCUM1]<br>p.R434Q [1] [SNU1040]                                                                                                                                                                                                                                                                                                                                                |
| TP53     | p.E180G [1] [A253]<br>p.G389W [1] [AN3CA]<br>p.Y103F [1] [COLO205]<br>p.R273H [1] [EN]<br>p.R283C [1] [HCC2218]<br>p.R273H [1] [HT]<br>p.R337L [1] [KMS12BM]<br>p.K120N [1] [KYSE70]<br>p.A74S [1] [MFE319]<br>p.R273H [1] [MOLT13]<br>p.C242F [1] [NCIH1755]<br>p.R273H [1] [NCIH2405]<br>p.V31I [1] [OCUM1]<br>p.C176W [1] [SHP77]<br>p.G360V [1] [SU8686]<br>p.R273H [1] [SW620]<br>p.F113V [1] [YH13] | p.C135R [1] [A704]<br>p.R249S [1] [BT549]<br>p.A347P [1] [COLO668]<br>p.R273H [1] [FTC133]<br>p.V218L [1] [HCC827]<br>p.R273H [1] [HT29]<br>p.R273H [1] [KP1N]<br>p.V122L [1] [L428]<br>p.P47R [1] [ML1]<br>p.R273H [1] [MONOMAC6]<br>p.R273H [1] [NCIH1793]<br>p.R273H [1] [NCIH508]<br>p.R181C [1] [REH]<br>p.R110L [1] [SKNDZ]<br>p.R273H [1] [SUDHL1]<br>p.R110L [1] [TE11] | p.Y126D [1] [A704]<br>p.M133K [1] [CMK]<br>p.C124R [1] [EFO21]<br>p.A74P [1] [HCC1419]<br>p.V216L [1] [HS940T]<br>p.R213L [1] [HT55]<br>p.I195T [1] [KYSE180]<br>p.R273H [1] [MDAMB468]<br>p.R110P [1] [MOGGUVW]<br>p.D324A [1] [NCIH146]<br>p.R273H [1] [NCIH1975]<br>p.F341C [1] [NUDUL1]<br>p.W53L [1] [RERFLCSQ1]<br>p.D48N [1] [SNU1040]<br>p.P309S [1] [SW620]<br>p.F113C [1] [UMUC3] |
| TPM3     | p.T241M [1] [FTC133]<br>p.R40L [1] [NCIH524]                                                                                                                                                                                                                                                                                                                                                              | p.Q44L [1] [HCC44]<br>p.A263T [1] [REH]                                                                                                                                                                                                                                                                                                                                         | p.A4D [1] [LNCAPCLONEFGC]                                                                                                                                                                                                                                                                                                                                                                   |
| TPM4     | p.A155V [1] [HT115]                                                                                                                                                                                                                                                                                                                                                                                       | p.A22T [1] [MOLT16]                                                                                                                                                                                                                                                                                                                                                             | p.A22E [1] [SW1271]                                                                                                                                                                                                                                                                                                                                                                         |
| TPR      | p.R1408K [1] [CAL148]<br>p.L792F [1] [JHH7]<br>p.M1257I [1] [NCIH2023]<br>p.K957R [1] [NCIH716]                                                                                                                                                                                                                                                                                                           | p.R1530H [1] [GI1]<br>p.R1530H [1] [LN229]<br>p.S1759F [1] [NCIH2087]<br>p.T2302A [1] [REH]                                                                                                                                                                                                                                                                                     | p.L1187F [1] [HCC15]<br>p.R1530H [1] [ME1]<br>p.V4G [1] [NCIH2087]<br>p.T1678A [1] [REH]                                                                                                                                                                                                                                                                                                    |
| TRIM33   | p.T1078S [1] [DAUDI]<br>p.T1078S [1] [OCIAML5]<br>p.V632A [1] [SNU1040]                                                                                                                                                                                                                                                                                                                                   | p.Q1064K [1] [DAUDI]<br>p.Q1064K [1] [OCIAML5]<br>p.L1071V [1] [SNU175]                                                                                                                                                                                                                                                                                                         | p.A1058G [1] [DAUDI]<br>p.A1058G [1] [OCIAML5]<br>p.K1012E [1] [SW1088]                                                                                                                                                                                                                                                                                                                     |
| TRIP11   | p.Q1397H [1] [A549]<br>p.G136S [1] [KASUMI1]<br>p.D204N [1] [RCHACV]<br>p.E281K [1] [SNU175]                                                                                                                                                                                                                                                                                                              | p.T305I [1] [HCT15]<br>p.L214P [1] [MSTO211H]<br>p.A880T [1] [REH]<br>p.I1809N [1] [TGBC11TKB]                                                                                                                                                                                                                                                                                  | p.T955A [1] [JHH2]<br>p.R1571H [1] [OVK18]<br>p.A880T [1] [SNU1040]<br>p.V296I [1] [YKG1]                                                                                                                                                                                                                                                                                                   |
| TSC1     | p.R692Q [1] [8505C]<br>p.A84T [1] [HSC3]<br>p.E78K [1] [SNU1040]                                                                                                                                                                                                                                                                                                                                          | p.G378R [1] [CAL54]<br>p.L203W [1] [KM12]                                                                                                                                                                                                                                                                                                                                       | p.G1034C [1] [DU145]<br>p.A344S [1] [SNU1040]                                                                                                                                                                                                                                                                                                                                               |
| TSC2     | p.I606V [1] [769P]<br>p.S970C [1] [DAUDI]<br>p.R1745C [1] [KM12]<br>p.V963M [1] [NB1]<br>p.A1195V [1] [SKUT1]<br>p.R1159Q [1] [SNU1040]<br>p.A1349V [1] [VMRCLCD]                                                                                                                                                                                                                                         | p.R1713H [1] [CMLT1]<br>p.V241I [1] [HCC1428]<br>p.R1245Q [1] [MOLT13]<br>p.H798Y [1] [NCIH1975]<br>p.A555T [1] [SNU1040]<br>p.A1622T [1] [SNU1040]                                                                                                                                                                                                                             | p.G1472D [1] [CW2]<br>p.Y285H [1] [HCT15]<br>p.R1409Q [1] [NALM6]<br>p.A1169T [1] [SBC5]<br>p.R988C [1] [SNU1040]<br>p.R1409Q [1] [TE10]                                                                                                                                                                                                                                                    |
| TSHR     | p.E35A [1] [CMLT1]                                                                                                                                                                                                                                                                                                                                                                                        | p.H63R [1] [EFO27]                                                                                                                                                                                                                                                                                                                                                              | p.D727G [1] [HT115]                                                                                                                                                                                                                                                                                                                                                                         |

|         |                                                                                                                                              |                                                                                                                    |                                                                                                                                |
|---------|----------------------------------------------------------------------------------------------------------------------------------------------|--------------------------------------------------------------------------------------------------------------------|--------------------------------------------------------------------------------------------------------------------------------|
|         | p.S271N [1] [KP4]<br>p.P16H [1] [NCIH596]<br>p.A538T [1] [SNU1040]                                                                           | p.L649M [1] [MDAMB361]<br>p.L122F [1] [SNU1040]<br>p.R17S [1] [SNU175]                                             | p.V597I [1] [MFE319]<br>p.A522D [1] [SNU1040]<br>p.S243F [1] [SNUC5]                                                           |
| TTL     | p.A88T [1] [CMLT1]<br>p.V351M [1] [PF382]                                                                                                    | p.K106R [1] [EBC1]<br>p.S76Y [1] [SNU81]                                                                           | p.A373V [1] [LS411N]                                                                                                           |
| USP6    | p.R1024Q [1] [BFTC909]<br>p.R1202G [1] [HCC2157]<br>p.H143Y [1] [MDST8]<br>p.R943H [1] [PF382]<br>p.D486Y [1] [SUDHL6]<br>p.P1160L [1] [TE9] | p.E202Q [1] [BT483]<br>p.V1140L [1] [KMH2]<br>p.P863S [1] [MEWO]<br>p.G1278D [1] [PF382]<br>p.D23E [1] [TE4]       | p.K131R [1] [BXPC3]<br>p.G354E [1] [KYSE70]<br>p.I276L [1] [NCIH660]<br>p.S1168I [1] [SNU175]<br>p.H224R [1] [TE8]             |
| WAS     | p.Q437K [1] [MDAMB231]                                                                                                                       | p.D493N [1] [SNU1040]                                                                                              | p.R268W [1] [SNU407]                                                                                                           |
| WHSC1   | p.H528Q [1] [BHY]<br>p.E1363Q [1] [EVSAT]<br>p.H528Q [1] [KYSE270]<br>p.K1347N [1] [RERFLCSQ1]                                               | p.G232S [1] [CMLT1]<br>p.S637L [1] [GRANTA519]<br>p.S946R [1] [MELJUSO]<br>p.N640K [1] [SAOS2]                     | p.V435I [1] [DBTRG05MG]<br>p.V1333A [1] [HCC56]<br>p.S643G [1] [PF382]                                                         |
| WHSC1L1 | p.K916R [1] [DAUDI]<br>p.N37H [1] [DAUDI]<br>p.V625A [1] [DND41]<br>p.T556A [1] [MV411]                                                      | p.N894S [1] [DAUDI]<br>p.C868F [1] [DB]<br>p.A1303V [1] [HCC1569]<br>p.K199N [1] [RPMI8226]                        | p.V625A [1] [DAUDI]<br>p.A458V [1] [DEL]<br>p.D1264H [1] [LS1034]<br>p.G1267D [1] [SNU1040]                                    |
| WIF1    | p.A180T [1] [IGROV1]                                                                                                                         | p.R217Q [1] [SW1783]                                                                                               | p.A354T [1] [SW48]                                                                                                             |
| WRN     | p.H945N [1] [BT474]<br>p.R499I [1] [HT115]<br>p.L495F [1] [MOLT13]<br>p.K1249Q [1] [SKNDZ]<br>p.S1333C [1] [SUDHL8]                          | p.L363P [1] [DB]<br>p.K590R [1] [HT115]<br>p.I239L [1] [NCIH1048]<br>p.V641I [1] [SNU1040]<br>p.M930I [1] [SW1271] | p.D468V [1] [EFO27]<br>p.S105Y [1] [LNCAPCLONEFGC]<br>p.R741Q [1] [NCIH1836]<br>p.N500S [1] [SNU81]<br>p.E106D [1] [TGBC11TKB] |
| WT1     | p.P181T [1] [A3KAW]                                                                                                                          | p.S136R [1] [DU145]                                                                                                |                                                                                                                                |
| XPA     | p.E159G [1] [FTC133]                                                                                                                         | p.D70H [1] [MM1S]                                                                                                  | p.A60T [1] [SNU175]                                                                                                            |
| XPC     | p.G404V [1] [BEN]<br>p.D68V [1] [KYSE150]<br>p.S460T [1] [PF382]                                                                             | p.F37L [1] [EN]<br>p.L184M [1] [LS411N]<br>p.Y803H [1] [RCHACV]                                                    | p.A152V [1] [JHH1]<br>p.S225N [1] [NUGC3]<br>p.R240H [1] [SNU1040]                                                             |
| ZNF331  | p.E59G [1] [L1236]                                                                                                                           | p.P382L [1] [LNCAPCLONEFGC]                                                                                        | p.R142H [1] [PF382]                                                                                                            |
| ZNF384  | p.R365Q [1] [SNU1040]                                                                                                                        | p.N9S [1] [SNU1040]                                                                                                |                                                                                                                                |
| ZNF521  | p.K426Q [1] [BV173]<br>p.V284I [1] [HT1080]<br>p.S1069Y [1] [NAMALWA]<br>p.S1142G [1] [SNGM]                                                 | p.Q54H [1] [DEL]<br>p.G1056W [1] [LNCAPCLONEFGC]<br>p.R937Q [1] [NCIH2052]                                         | p.Q1044K [1] [FU97]<br>p.P1111L [1] [MEWO]<br>p.S526A [1] [SKMEL30]                                                            |

## Supplementary Table 2

Sequencing cold spots (larger than 100bp) in cancer consensus and kinase genes identified from sequencing data of 10 CCLE whole exome sequencing files (not hybrid capture).

| geneSymbol | Chromosome | start     | end       | width coldspot | transcriptId    | Exon Number | GC Content  | Mean Read Cover of Coldspot |
|------------|------------|-----------|-----------|----------------|-----------------|-------------|-------------|-----------------------------|
| AAK1       | 2          | 69746086  | 69746241  | 156            | ENST00000406297 | 11          | 0.653846154 | 1.669871795                 |
| AATK       | 17         | 79095991  | 79096471  | 481            | ENST00000326724 | 11          | 0.756756757 | 1.903950104                 |
| AATK       | 17         | 79096994  | 79097143  | 150            | ENST00000326724 | 10          | 0.673333333 | 1.247333333                 |
| AATK       | 17         | 79101592  | 79101710  | 119            | ENST00000326724 | 5           | 0.621848739 | 2.434453782                 |
| ACSL3      | 2          | 223785672 | 223785786 | 115            | ENST00000421680 | 1           | 0.408695652 | 1.064347826                 |
| ACVR1B     | 12         | 52376470  | 52376592  | 123            | ENST00000541224 | 5           | 0.495934959 | 0                           |
| ADCK1      | 14         | 78294197  | 78294314  | 118            | ENST00000556048 | 3           | 0.559322034 | 0                           |
| ADCK2      | 7          | 140395827 | 140395985 | 159            | ENST00000483369 | 8           | 0.597484277 | 0.018867925                 |
| ADRBK1     | 11         | 67053864  | 67053995  | 132            | ENST00000526285 | 14          | 0.575757576 | 0.159090909                 |
| AFF1       | 4          | 87970804  | 87970914  | 111            | ENST00000514970 | 1           | 0.612612613 | 0.045045045                 |
| AFF3       | 2          | 100722242 | 100722484 | 243            | ENST00000415384 | 1           | 0.576131687 | 0.06255144                  |
| AFF3       | 2          | 100720864 | 100720980 | 117            | ENST00000415384 | 3           | 0.717948718 | 2.152991453                 |
| AKAP9      | 7          | 91630162  | 91630286  | 125            | ENST00000356239 | 8           | 0.256       | 1.552                       |
| ALDH2      | 12         | 112213409 | 112213524 | 116            | ENST00000548536 | 2           | 0.49137931  | 0                           |
| ALDH2      | 12         | 112204787 | 112204900 | 114            | ENST00000261733 | 1           | 0.745614035 | 2.235087719                 |
| ALK        | 2          | 29443854  | 29444103  | 250            | ENST00000453137 | 4           | 0.536       | 0.7328                      |
| ALPK3      | 15         | 85360412  | 85360826  | 415            | ENST00000258888 | 1           | 0.804819277 | 0.530843373                 |
| AMHR2      | 12         | 53822680  | 53822794  | 115            | ENST00000257863 | 7           | 0.617391304 | 1.51826087                  |
| APC        | 5          | 112043415 | 112043579 | 165            | ENST00000507379 | 1           | 0.696969697 | 0.397575758                 |
| ARHGAP26   | 5          | 142437466 | 142437606 | 141            | ENST00000443045 | 3           | 0.517730496 | 1.204255319                 |
| ARID1A     | 1          | 27022895  | 27023383  | 489            | ENST00000324856 | 1           | 0.781186094 | 0.611860941                 |
| ARID1A     | 1          | 27023835  | 27024031  | 197            | ENST00000324856 | 1           | 0.796954315 | 1.260406091                 |
| ASPCR1     | 17         | 79967808  | 79967928  | 121            | ENST00000584454 | 8           | 0.603305785 | 0                           |
| ATF1       | 12         | 51181991  | 51182108  | 118            | ENST00000549612 | 2           | 0.56779661  | 0                           |
| ATIC       | 2          | 216176866 | 216176997 | 132            | ENST00000427397 | 1           | 0.787878788 | 0.867424242                 |
| AURKC      | 19         | 57742617  | 57742757  | 141            | ENST00000601799 | 1           | 0.617021277 | 1.827659574                 |
| AXIN1      | 16         | 348136    | 348251    | 116            | ENST00000262320 | 5           | 0.698275862 | 2.169827586                 |
| BCL3       | 19         | 45252048  | 45252303  | 256            | ENST00000164227 | 1           | 0.8203125   | 0.83125                     |
| BCR        | 22         | 23523366  | 23523508  | 143            | ENST00000305877 | 1           | 0.853146853 | 1.065734266                 |
| BCR        | 22         | 23585005  | 23585129  | 125            | ENST00000398512 | 2           | 0.576       | 0                           |
| BIRC3      | 11         | 102197460 | 102197582 | 123            | ENST00000527309 | 3           | 0.56097561  | 0                           |
| BLK        | 8          | 11418274  | 11418706  | 433            | ENST00000526097 | 1           | 0.579676674 | 0.792840647                 |
| BMP2K      | 4          | 79697698  | 79697834  | 137            | ENST00000335016 | 1           | 0.781021898 | 1.732846715                 |
| BRAF       | 7          | 140624366 | 140624503 | 138            | ENST00000288602 | 1           | 0.775362319 | 0.992028986                 |
| BRCA2      | 13         | 32970128  | 32970229  | 102            | ENST00000470094 | 4           | 0.539215686 | 0                           |

|          |    |           |           |     |                 |    |             |             |
|----------|----|-----------|-----------|-----|-----------------|----|-------------|-------------|
| BRD2     | 6  | 32939372  | 32939753  | 382 | ENST00000496118 | 2  | 0.628272251 | 0.511780105 |
| BRD2     | 6  | 32937023  | 32937129  | 107 | ENST00000496118 | 1  | 0.663551402 | 0.122429907 |
| BRD2     | 6  | 32946867  | 32946971  | 105 | ENST00000395287 | 10 | 0.571428571 | 0           |
| BRD4     | 19 | 15353821  | 15354018  | 198 | ENST00000263377 | 13 | 0.732323232 | 0.952525253 |
| BRIP1    | 17 | 59816592  | 59816771  | 180 | ENST00000584322 | 4  | 0.461111111 | 0           |
| BRSK1    | 19 | 55795811  | 55795946  | 136 | ENST00000309383 | 1  | 0.683823529 | 0.688235294 |
| BRSK1    | 19 | 55795334  | 55795449  | 116 | ENST00000590333 | 2  | 0.681034483 | 0.38362069  |
| BRSK2    | 11 | 1481730   | 1481953   | 224 | ENST00000528841 | 20 | 0.669642857 | 2.125       |
| BRSK2    | 11 | 1481778   | 1481953   | 176 | ENST00000382179 | 20 | 0.755681818 | 2.063068182 |
| BUB1B    | 15 | 40458560  | 40458671  | 112 | ENST00000558715 | 3  | 0.607142857 | 0           |
| CAMK2B   | 7  | 44265362  | 44265512  | 151 | ENST00000425809 | 1  | 0.622516556 | 0.29602649  |
| CAMK2B   | 7  | 44284488  | 44284614  | 127 | ENST00000421607 | 7  | 0.645669291 | 0.061417323 |
| CAMK2B   | 7  | 44363410  | 44363522  | 113 | ENST00000415369 | 1  | 0.654867257 | 0.074336283 |
| CAMK2G   | 10 | 75579290  | 75579403  | 114 | ENST00000322680 | 17 | 0.675438596 | 0.915789474 |
| CAMTA1   | 1  | 6867043   | 6867148   | 106 | ENST00000467404 | 2  | 0.490566038 | 0           |
| CBFA2T3  | 16 | 88943384  | 88943560  | 177 | ENST00000268679 | 12 | 0.768361582 | 2.284745763 |
| CCND2    | 12 | 4406923   | 4407116   | 194 | ENST00000536537 | 3  | 0.56185567  | 0           |
| CD8A     | 2  | 87017956  | 87018071  | 116 | ENST00000538832 | 1  | 0.74137931  | 2.364655172 |
| CDC42BPB | 14 | 103523336 | 103523510 | 175 | ENST00000361246 | 1  | 0.668571429 | 1.962285714 |
| CDC42BPB | 14 | 103411511 | 103411668 | 158 | ENST00000558867 | 1  | 0.607594937 | 0.943037975 |
| CDC42BPG | 11 | 64600703  | 64600808  | 106 | ENST00000342711 | 24 | 0.70754717  | 1.385849057 |
| CDH1     | 16 | 68772200  | 68772314  | 115 | ENST00000261769 | 2  | 0.695652174 | 0.48        |
| CDK10    | 16 | 89753997  | 89754119  | 123 | ENST00000502547 | 2  | 0.609756098 | 0           |
| CDK10    | 16 | 89753857  | 89753956  | 100 | ENST00000511415 | 2  | 0.58        | 0.032       |
| CDK11B   | 1  | 1581134   | 1581245   | 112 | ENST00000340677 | 4  | 0.455357143 | 0.480357143 |
| CDK13    | 7  | 39990241  | 39991058  | 818 | ENST00000181839 | 1  | 0.754278729 | 0.706601467 |
| CDK16    | X  | 47082495  | 47082710  | 216 | ENST00000276052 | 1  | 0.564814815 | 0.061111111 |
| CDK16    | X  | 47088258  | 47088390  | 133 | ENST00000520141 | 4  | 0.586466165 | 2.327067669 |
| CDK2     | 12 | 56364382  | 56364525  | 144 | ENST00000553376 | 6  | 0.569444444 | 0.379166667 |
| CDK20    | 9  | 90582377  | 90582574  | 198 | ENST00000325303 | 8  | 0.621212121 | 2.646969697 |
| CDK9     | 9  | 130548077 | 130548348 | 272 | ENST00000373265 | 1  | 0.808823529 | 0.192647059 |
| CDKL2    | 4  | 76517330  | 76517453  | 124 | ENST00000307465 | 10 | 0.419354839 | 0           |
| CDKL2    | 4  | 76517003  | 76517109  | 107 | ENST00000307465 | 11 | 0.420560748 | 0           |
| CDKL3    | 5  | 133622064 | 133622250 | 187 | ENST00000435240 | 7  | 0.438502674 | 0           |
| CDKL3    | 5  | 133655049 | 133655188 | 140 | ENST00000265334 | 5  | 0.385714286 | 1.282142857 |
| CDKL4    | 2  | 39403136  | 39403237  | 102 | ENST00000451199 | 4  | 0.431372549 | 0.074509804 |
| CDX2     | 13 | 28542775  | 28542932  | 158 | ENST00000381020 | 1  | 0.740506329 | 2.098734177 |
| CEBPA    | 19 | 33792559  | 33793320  | 762 | ENST00000498907 | 1  | 0.776902887 | 0.159711286 |
| CHEK1    | 11 | 125495656 | 125495907 | 252 | ENST00000427383 | 1  | 0.619047619 | 0.077380952 |
| CHEK2    | 22 | 29126408  | 29126536  | 129 | ENST00000382580 | 2  | 0.534883721 | 0.343410853 |
| CHN1     | 2  | 175711608 | 175711859 | 252 | ENST00000295497 | 1  | 0.412698413 | 1.820238095 |

|         |    |           |           |      |                 |    |             |             |
|---------|----|-----------|-----------|------|-----------------|----|-------------|-------------|
| CIC     | 19 | 42775936  | 42778729  | 2794 | ENST00000572681 | 1  | 0.672870437 | 0.456120258 |
| CLK1    | 2  | 201728824 | 201728949 | 126  | ENST00000434813 | 1  | 0.658730159 | 0.103968254 |
| CLK3    | 15 | 74907796  | 74908239  | 444  | ENST00000395066 | 1  | 0.777027027 | 1.183783784 |
| CLK4    | 5  | 178047566 | 178047674 | 109  | ENST00000522556 | 2  | 0.366972477 | 0           |
| CREB3L2 | 7  | 137592998 | 137593182 | 185  | ENST00000330387 | 5  | 0.691891892 | 1.482162162 |
| CREB3L2 | 7  | 137607336 | 137607513 | 178  | ENST00000420629 | 2  | 0.404494382 | 0           |
| CREBBP  | 16 | 3779176   | 3779285   | 110  | ENST00000262367 | 31 | 0.763636364 | 2.398181818 |
| CRLF2   | X  | 1317790   | 1318008   | 219  | ENST00000381566 | 5  | 0.566210046 | 0.063926941 |
| CRTC1   | 19 | 18794513  | 18794638  | 126  | ENST00000321949 | 1  | 0.626984127 | 0.697619048 |
| CSNK1D  | 17 | 80207307  | 80207432  | 126  | ENST00000314028 | 7  | 0.722222222 | 1.564285714 |
| CSNK1E  | 22 | 38694096  | 38694209  | 114  | ENST00000451964 | 5  | 0.657894737 | 0.197368421 |
| DAPK2   | 15 | 64214934  | 64215542  | 609  | ENST00000558069 | 9  | 0.569786535 | 0.074876847 |
| DAPK2   | 15 | 64283427  | 64283550  | 124  | ENST00000561162 | 2  | 0.564516129 | 0           |
| DAPK2   | 15 | 64203305  | 64203415  | 111  | ENST00000558064 | 2  | 0.54954955  | 0           |
| DMPK    | 19 | 46273739  | 46273898  | 160  | ENST00000458663 | 15 | 0.7         | 2.278125    |
| DNM2    | 19 | 10943974  | 10944136  | 163  | ENST00000591818 | 2  | 0.441717791 | 1.090184049 |
| DYRK1B  | 19 | 40317482  | 40317627  | 146  | ENST00000323039 | 8  | 0.760273973 | 1.301369863 |
| DYRK2   | 12 | 68045307  | 68045438  | 132  | ENST00000542503 | 1  | 0.386363636 | 0           |
| DYRK4   | 12 | 4699496   | 4699606   | 111  | ENST00000542744 | 4  | 0.477477477 | 0.175675676 |
| EIF2AK1 | 7  | 6063497   | 6063745   | 249  | ENST00000536084 | 14 | 0.510040161 | 0.797991968 |
| EIF2AK1 | 7  | 6067557   | 6067686   | 130  | ENST00000426957 | 5  | 0.538461538 | 0           |
| EIF2AK1 | 7  | 6066066   | 6066183   | 118  | ENST00000422786 | 1  | 0.652542373 | 1           |
| EIF2AK3 | 2  | 88926639  | 88926792  | 154  | ENST00000303236 | 1  | 0.792207792 | 0.636363636 |
| EPHA10  | 1  | 38218548  | 38218898  | 351  | ENST00000373048 | 5  | 0.794871795 | 0.294586895 |
| EPHA6   | 3  | 97364963  | 97365154  | 192  | ENST00000514100 | 10 | 0.489583333 | 0           |
| EPHA6   | 3  | 96533718  | 96533852  | 135  | ENST00000389672 | 1  | 0.533333333 | 2.22        |
| EPHB3   | 3  | 184280024 | 184280141 | 118  | ENST00000330394 | 1  | 0.805084746 | 0.213559322 |
| EPS15   | 1  | 51924187  | 51924405  | 219  | ENST00000371727 | 9  | 0.534246575 | 0           |
| ERBB2   | 17 | 37869406  | 37869522  | 117  | ENST00000578502 | 4  | 0.547008547 | 0           |
| ETV5    | 3  | 185801958 | 185802069 | 112  | ENST00000422039 | 5  | 0.392857143 | 0           |
| EZH2    | 7  | 148533914 | 148534092 | 179  | ENST00000483012 | 3  | 0.480446927 | 0.079888268 |
| FANCA   | 16 | 89882547  | 89882963  | 417  | ENST00000567943 | 1  | 0.815347722 | 0.770503597 |
| FANCA   | 16 | 89839679  | 89839792  | 114  | ENST00000389301 | 22 | 0.631578947 | 0.93245614  |
| FANCA   | 16 | 89844765  | 89844870  | 106  | ENST00000567510 | 4  | 0.566037736 | 0           |
| FANCE   | 6  | 35420323  | 35420570  | 248  | ENST00000229769 | 1  | 0.790322581 | 0.574193548 |
| FBXO11  | 2  | 48132628  | 48132859  | 232  | ENST00000403359 | 1  | 0.771551724 | 1.090948276 |
| FEV     | 2  | 219846389 | 219846652 | 264  | ENST00000295727 | 3  | 0.78030303  | 0.381818182 |
| FGFR10P | 6  | 167412901 | 167413002 | 102  | ENST00000349556 | 1  | 0.696078431 | 0.347058824 |
| FGFR3   | 4  | 1806548   | 1806696   | 149  | ENST00000481110 | 9  | 0.66442953  | 1.318120805 |
| FH      | 1  | 241682891 | 241683022 | 132  | ENST00000366560 | 1  | 0.704545455 | 0.549242424 |
| FOXL2   | 3  | 138664845 | 138665051 | 207  | ENST00000330315 | 1  | 0.743961353 | 1.520289855 |

|          |    |           |           |     |                 |    |             |             |
|----------|----|-----------|-----------|-----|-----------------|----|-------------|-------------|
| FOXL2    | 3  | 138664596 | 138664725 | 130 | ENST00000330315 | 1  | 0.838461538 | 1.190769231 |
| FOXO1    | 13 | 41239919  | 41240349  | 431 | ENST00000379561 | 1  | 0.786542923 | 0.56612529  |
| FOXO3    | 6  | 108882665 | 108882793 | 129 | ENST00000343882 | 1  | 0.775193798 | 2.357364341 |
| FSTL3    | 19 | 680274    | 680489    | 216 | ENST00000166139 | 3  | 0.777777778 | 0.681018519 |
| GPHN     | 14 | 67648137  | 67648287  | 151 | ENST00000556240 | 2  | 0.516556291 | 0.066225166 |
| GRK1     | 13 | 114438041 | 114438336 | 296 | ENST00000335678 | 7  | 0.557432432 | 0.075337838 |
| GRK1     | 13 | 114435857 | 114436058 | 202 | ENST00000335678 | 6  | 0.599009901 | 0.000990099 |
| GRK1     | 13 | 114434192 | 114434316 | 125 | ENST00000335678 | 5  | 0.616       | 0.0624      |
| GRK4     | 4  | 2966970   | 2967234   | 265 | ENST00000442472 | 2  | 0.562264151 | 0.12754717  |
| GSK3A    | 19 | 42746424  | 42746617  | 194 | ENST00000222330 | 1  | 0.804123711 | 0.743814433 |
| GUCY2D   | 17 | 7906366   | 7906836   | 471 | ENST00000254854 | 1  | 0.779193206 | 1.063906582 |
| HIPK1    | 1  | 114471944 | 114472154 | 211 | ENST00000426820 | 1  | 0.592417062 | 0.297156398 |
| HMGA1    | 6  | 34212675  | 34213392  | 718 | ENST00000395004 | 3  | 0.633704735 | 0.559192201 |
| HMGA2    | 12 | 66219051  | 66219161  | 111 | ENST00000354636 | 1  | 0.711711712 | 2.606306306 |
| HNF1A    | 12 | 121434659 | 121434799 | 141 | ENST00000543427 | 5  | 0.475177305 | 1.346099291 |
| HOXA13   | 7  | 27239208  | 27239550  | 343 | ENST00000222753 | 1  | 0.827988338 | 0.452186589 |
| HOXC11   | 12 | 54369261  | 54369415  | 155 | ENST00000243082 | 2  | 0.606451613 | 0.603870968 |
| HOXC13   | 12 | 54332783  | 54333017  | 235 | ENST00000243056 | 1  | 0.791489362 | 1.889361702 |
| HOXD11   | 2  | 176972336 | 176972864 | 529 | ENST00000249504 | 1  | 0.799621928 | 0.402646503 |
| HOXD13   | 2  | 176957619 | 176957798 | 180 | ENST00000392539 | 1  | 0.783333333 | 0.267222222 |
| HSPB8    | 12 | 119658519 | 119658757 | 239 | ENST00000541798 | 4  | 0.355648536 | 0           |
| IDH2     | 15 | 90645508  | 90645622  | 115 | ENST00000330062 | 1  | 0.765217391 | 1.84        |
| IGF1R    | 15 | 99478545  | 99478655  | 111 | ENST00000268035 | 17 | 0.54954955  | 1.065765766 |
| IKBKB    | 8  | 42188725  | 42188949  | 225 | ENST00000522147 | 2  | 0.595555556 | 0.473777778 |
| IKZF1    | 7  | 50435704  | 50436068  | 365 | ENST00000413698 | 3  | 0.419178082 | 0.036986301 |
| INSR     | 19 | 7293803   | 7293902   | 100 | ENST00000302850 | 1  | 0.83        | 1.086       |
| IRAK1    | X  | 153276391 | 153276567 | 177 | ENST00000444230 | 5  | 0.508474576 | 0.080225989 |
| IRAK3    | 12 | 66590660  | 66590808  | 149 | ENST00000545837 | 2  | 0.369127517 | 0           |
| IRAK3    | 12 | 66583085  | 66583212  | 128 | ENST00000261233 | 1  | 0.7578125   | 2.3015625   |
| JAZF1    | 7  | 28060172  | 28060331  | 160 | ENST00000420835 | 1  | 0.45625     | 0           |
| KDM5A    | 12 | 497399    | 497506    | 108 | ENST00000536014 | 1  | 0.342592593 | 0.122222222 |
| KDM6A    | X  | 44919854  | 44920009  | 156 | ENST00000382899 | 13 | 0.435897436 | 0.165384615 |
| KDM6A    | X  | 44965787  | 44965894  | 108 | ENST00000431196 | 2  | 0.407407407 | 0           |
| KIAA1549 | 7  | 138665829 | 138666015 | 187 | ENST00000422774 | 1  | 0.839572193 | 0.054545455 |
| KSR1     | 17 | 25915220  | 25915413  | 194 | ENST00000577823 | 3  | 0.56185567  | 0.38556701  |
| KSR1     | 17 | 25950538  | 25950671  | 134 | ENST00000578981 | 2  | 0.447761194 | 1.258208955 |
| LASP1    | 17 | 37054665  | 37054772  | 108 | ENST00000318008 | 4  | 0.527777778 | 0.596296296 |
| LATS1    | 6  | 150038985 | 150039170 | 186 | ENST00000458696 | 1  | 0.725806452 | 0.211827957 |
| LATS2    | 13 | 21562477  | 21562617  | 141 | ENST00000382592 | 3  | 0.794326241 | 1.734042553 |
| LIMK1    | 7  | 73497365  | 73497509  | 145 | ENST00000418310 | 1  | 0.593103448 | 0           |
| LMO2     | 11 | 33890892  | 33891132  | 241 | ENST00000257818 | 2  | 0.780082988 | 0.121576763 |

|         |    |           |           |     |                 |    |             |             |
|---------|----|-----------|-----------|-----|-----------------|----|-------------|-------------|
| LMTK3   | 19 | 49002459  | 49003076  | 618 | ENST00000270238 | 12 | 0.74433657  | 1.041100324 |
| LMTK3   | 19 | 49001889  | 49002277  | 389 | ENST00000270238 | 12 | 0.784061697 | 0.984318766 |
| LMTK3   | 19 | 48997026  | 48997366  | 341 | ENST00000270238 | 13 | 0.835777126 | 0.705865103 |
| LMTK3   | 19 | 49000887  | 49001102  | 216 | ENST00000270238 | 12 | 0.759259259 | 1.498148148 |
| LRIG3   | 12 | 59313781  | 59314016  | 236 | ENST00000320743 | 1  | 0.745762712 | 2.022881356 |
| LRRK1   | 15 | 101514009 | 101514172 | 164 | ENST00000284395 | 2  | 0.762195122 | 1.723170732 |
| LTK     | 15 | 41803418  | 41803544  | 127 | ENST00000263800 | 7  | 0.803149606 | 1.772440945 |
| LYL1    | 19 | 13210209  | 13210398  | 190 | ENST00000264824 | 3  | 0.768421053 | 2.453684211 |
| MAF     | 16 | 79633066  | 79633422  | 357 | ENST00000326043 | 1  | 0.865546218 | 0.425770308 |
| MALT1   | 18 | 56338876  | 56339084  | 209 | ENST00000345724 | 1  | 0.779904306 | 0.055023923 |
| MAML2   | 11 | 96074547  | 96074791  | 245 | ENST00000440572 | 1  | 0.640816327 | 0.795510204 |
| MAML2   | 11 | 95825212  | 95825409  | 198 | ENST00000440572 | 2  | 0.545454545 | 2.506060606 |
| MAP2K2  | 19 | 4090596   | 4090706   | 111 | ENST00000262948 | 11 | 0.603603604 | 3.381981982 |
| MAP2K3  | 17 | 21191303  | 21191403  | 101 | ENST00000529517 | 2  | 0.643564356 | 0           |
| MAP2K4  | 17 | 11924204  | 11924318  | 115 | ENST00000353533 | 1  | 0.826086957 | 0.42        |
| MAP2K7  | 19 | 7974640   | 7974781   | 142 | ENST00000397979 | 2  | 0.732394366 | 1.762676056 |
| MAP3K1  | 5  | 56111401  | 56111882  | 482 | ENST00000399503 | 1  | 0.790456432 | 0.574273859 |
| MAP3K10 | 19 | 40719574  | 40719789  | 216 | ENST00000253055 | 9  | 0.800925926 | 0.740277778 |
| MAP3K15 | X  | 19533094  | 19533379  | 286 | ENST00000338883 | 1  | 0.825174825 | 0.587762238 |
| MAP3K6  | 1  | 27692770  | 27693088  | 319 | ENST00000357582 | 1  | 0.808777429 | 0.558934169 |
| MAP3K9  | 14 | 71275777  | 71275888  | 112 | ENST00000381250 | 1  | 0.758928571 | 1.486607143 |
| MAP4K4  | 2  | 102487956 | 102488147 | 192 | ENST00000350878 | 20 | 0.5625      | 0.386979167 |
| MAP4K4  | 2  | 102472439 | 102472600 | 162 | ENST00000302217 | 9  | 0.5         | 0.17345679  |
| MAP4K4  | 2  | 102413726 | 102413845 | 120 | ENST00000350878 | 1  | 0.491666667 | 0.0725      |
| MAPK4   | 18 | 48230900  | 48231199  | 300 | ENST00000588540 | 2  | 0.53        | 0           |
| MAPK4   | 18 | 48255843  | 48256037  | 195 | ENST00000400384 | 5  | 0.78974359  | 1.391282051 |
| MAPK7   | 17 | 19285234  | 19285338  | 105 | ENST00000299612 | 2  | 0.628571429 | 2.747619048 |
| MAPK7   | 17 | 19281840  | 19281943  | 104 | ENST00000581260 | 1  | 0.692307692 | 0.001923077 |
| MAPK9   | 5  | 179706796 | 179707036 | 241 | ENST00000397072 | 2  | 0.547717842 | 0.029460581 |
| MARK2   | 11 | 63636226  | 63636381  | 156 | ENST00000543674 | 1  | 0.506410256 | 0           |
| MARK3   | 14 | 103957289 | 103957444 | 156 | ENST00000556744 | 3  | 0.493589744 | 0.070512821 |
| MARK4   | 19 | 45801072  | 45801212  | 141 | ENST00000262891 | 15 | 0.70212766  | 1.858865248 |
| MAST2   | 1  | 46269568  | 46269744  | 177 | ENST00000361297 | 1  | 0.779661017 | 0.062711864 |
| MAST3   | 19 | 18260111  | 18260327  | 217 | ENST00000262811 | 27 | 0.792626728 | 1.329493088 |
| MAST4   | 5  | 65892625  | 65892846  | 222 | ENST00000403625 | 1  | 0.779279279 | 1.3         |
| MATK    | 19 | 3782816   | 3782935   | 120 | ENST00000588983 | 3  | 0.608333333 | 0.8975      |
| MDS2    | 1  | 23966879  | 23967039  | 161 | ENST00000374555 | 4  | 0.49689441  | 0           |
| MED12   | X  | 70361080  | 70361220  | 141 | ENST00000333646 | 43 | 0.624113475 | 0.939716312 |
| MINK1   | 17 | 4793517   | 4793726   | 210 | ENST00000571207 | 10 | 0.538095238 | 0.880952381 |
| MINK1   | 17 | 4784427   | 4784552   | 126 | ENST00000347992 | 4  | 0.531746032 | 0.48015873  |
| MINK1   | 17 | 4762508   | 4762623   | 116 | ENST00000574453 | 2  | 0.431034483 | 0           |



|         |    |           |           |     |                 |    |             |             |
|---------|----|-----------|-----------|-----|-----------------|----|-------------|-------------|
| MINK1   | 17 | 4793918   | 4794030   | 113 | ENST00000347992 | 14 | 0.610619469 | 1.639823009 |
| MKNK1   | 1  | 47037089  | 47037211  | 123 | ENST00000371946 | 7  | 0.601626016 | 0           |
| MKNK2   | 19 | 2041839   | 2041939   | 101 | ENST00000250896 | 10 | 0.693069307 | 2.045544554 |
| MLK4    | 1  | 233463775 | 233464139 | 365 | ENST00000366623 | 1  | 0.77260274  | 2.463561644 |
| MLL     | 11 | 118307286 | 118307405 | 120 | ENST00000354520 | 1  | 0.891666667 | 0.801666667 |
| MLL2    | 12 | 49426589  | 49427023  | 435 | ENST00000301067 | 39 | 0.570114943 | 1.442988506 |
| MLL2    | 12 | 49432642  | 49432772  | 131 | ENST00000301067 | 34 | 0.557251908 | 2.459541985 |
| MLLT10  | 10 | 21840745  | 21840850  | 106 | ENST00000377091 | 3  | 0.594339623 | 0           |
| MLLT10  | 10 | 21845769  | 21845871  | 103 | ENST00000377100 | 3  | 0.359223301 | 1.723300971 |
| MLLT4   | 6  | 168366616 | 168366950 | 335 | ENST00000485634 | 1  | 0.570149254 | 0.195522388 |
| MLLT4   | 6  | 168366519 | 168366725 | 207 | ENST00000351017 | 32 | 0.68115942  | 0.972463768 |
| MLLT4   | 6  | 168366823 | 168366956 | 134 | ENST00000515794 | 1  | 0.544776119 | 0.058955224 |
| MLLT6   | 17 | 36878250  | 36878480  | 231 | ENST00000325718 | 17 | 0.744588745 | 1.038961039 |
| MN1     | 22 | 28194677  | 28194894  | 218 | ENST00000302326 | 1  | 0.71559633  | 2.88440367  |
| MN1     | 22 | 28195457  | 28195669  | 213 | ENST00000302326 | 1  | 0.680751174 | 1.900938967 |
| MNX1    | 7  | 156802516 | 156802919 | 404 | ENST00000252971 | 1  | 0.853960396 | 0.419059406 |
| MOK     | 14 | 102692622 | 102692745 | 124 | ENST00000193029 | 2  | 0.596774194 | 0.913709677 |
| MSI2    | 17 | 55363245  | 55363373  | 129 | ENST00000442934 | 1  | 0.364341085 | 0.004651163 |
| MUC1    | 1  | 155160959 | 155161428 | 470 | ENST00000425082 | 3  | 0.787234043 | 0.720851064 |
| MYB     | 6  | 135523552 | 135523807 | 256 | ENST00000316528 | 14 | 0.578125    | 0           |
| MYCL1   | 1  | 40366486  | 40366643  | 158 | ENST00000372815 | 2  | 0.64556962  | 1.882911392 |
| NCKIPSD | 3  | 48723070  | 48723188  | 119 | ENST00000294129 | 1  | 0.739495798 | 2.221848739 |
| NCKIPSD | 3  | 48720336  | 48720445  | 110 | ENST00000294129 | 2  | 0.618181818 | 2.111818182 |
| NCOA4   | 10 | 51573300  | 51573416  | 117 | ENST00000431200 | 1  | 0.427350427 | 0           |
| NDRG1   | 8  | 134297000 | 134297139 | 140 | ENST00000522738 | 2  | 0.564285714 | 0.107142857 |
| NDRG1   | 8  | 134267530 | 134267643 | 114 | ENST00000522377 | 8  | 0.473684211 | 0           |
| NEK4    | 3  | 52783708  | 52783845  | 138 | ENST00000233027 | 8  | 0.608695652 | 0           |
| NEK4    | 3  | 52781346  | 52781467  | 122 | ENST00000487068 | 3  | 0.557377049 | 0.043442623 |
| NEK9    | 14 | 75593445  | 75593624  | 180 | ENST00000238616 | 1  | 0.7         | 2.805555556 |
| NF1     | 17 | 29422226  | 29422387  | 162 | ENST00000579081 | 1  | 0.75308642  | 0.969135802 |
| NFIB    | 9  | 14116180  | 14116345  | 166 | ENST00000397581 | 9  | 0.542168675 | 0           |
| NFIB    | 9  | 14116207  | 14116345  | 139 | ENST00000380953 | 9  | 0.539568345 | 0           |
| NFIB    | 9  | 14398523  | 14398630  | 108 | ENST00000380934 | 1  | 0.435185185 | 0           |
| NFKB2   | 10 | 104159361 | 104159475 | 115 | ENST00000189444 | 13 | 0.747826087 | 1.784347826 |
| NIN     | 14 | 51223378  | 51223575  | 198 | ENST00000245441 | 16 | 0.424242424 | 1.890909091 |
| NKX2-1  | 14 | 36986634  | 36986864  | 231 | ENST00000354822 | 3  | 0.766233766 | 1.061471861 |
| NOTCH1  | 9  | 139399125 | 139399227 | 103 | ENST00000277541 | 26 | 0.757281553 | 2.914563107 |
| NPR1    | 1  | 153651585 | 153651822 | 238 | ENST00000368680 | 1  | 0.756302521 | 1.928151261 |
| NR4A3   | 9  | 102590911 | 102591122 | 212 | ENST00000330847 | 2  | 0.806603774 | 1.143396226 |
| NRBP2   | 8  | 144922878 | 144923006 | 129 | ENST00000442628 | 1  | 0.728682171 | 0.341860465 |
| NRBP2   | 8  | 144922279 | 144922401 | 123 | ENST00000442628 | 2  | 0.609756098 | 0.198373984 |

|          |    |           |           |     |                 |    |             |             |
|----------|----|-----------|-----------|-----|-----------------|----|-------------|-------------|
| NRBP2    | 8  | 144922279 | 144922386 | 108 | ENST00000530347 | 1  | 0.62962963  | 0.198148148 |
| NRBP2    | 8  | 144917608 | 144917712 | 105 | ENST00000530123 | 4  | 0.685714286 | 1.863809524 |
| NRBP2    | 8  | 144922101 | 144922202 | 102 | ENST00000442628 | 3  | 0.588235294 | 0.234313725 |
| NRK      | X  | 105192632 | 105192751 | 120 | ENST00000540278 | 1  | 0.483333333 | 0           |
| NRK      | X  | 105167372 | 105167474 | 103 | ENST00000243300 | 18 | 0.339805825 | 1.711650485 |
| NSD1     | 5  | 176656766 | 176656875 | 110 | ENST00000375350 | 2  | 0.581818182 | 0           |
| NT5C2    | 10 | 104860571 | 104860680 | 110 | ENST00000552185 | 5  | 0.609090909 | 2.411818182 |
| OBSCN    | 1  | 228399786 | 228400144 | 359 | ENST00000284548 | 1  | 0.77994429  | 1.365738162 |
| OBSCN    | 1  | 228526554 | 228526727 | 174 | ENST00000284548 | 68 | 0.637931034 | 1.931034483 |
| OBSCN    | 1  | 228559048 | 228559189 | 142 | ENST00000366707 | 69 | 0.774647887 | 2.704225352 |
| OBSCN    | 1  | 228522893 | 228522999 | 107 | ENST00000284548 | 61 | 0.710280374 | 1.745794393 |
| OBSCN    | 1  | 228566020 | 228566121 | 102 | ENST00000366707 | 79 | 0.745098039 | 2.395098039 |
| OBSCN    | 1  | 228465206 | 228465306 | 101 | ENST00000493813 | 2  | 0.613861386 | 2.135643564 |
| OLIG2    | 21 | 34399683  | 34400142  | 460 | ENST00000333337 | 1  | 0.767391304 | 0.476086957 |
| PAFAH1B2 | 11 | 117015009 | 117015134 | 126 | ENST00000304808 | 1  | 0.761904762 | 0.164285714 |
| PAFAH1B2 | 11 | 117042338 | 117042462 | 125 | ENST00000530272 | 5  | 0.488       | 0.0592      |
| PAK4     | 19 | 39663558  | 39663779  | 222 | ENST00000358301 | 2  | 0.689189189 | 2.56981982  |
| PBRM1    | 3  | 52592265  | 52592429  | 165 | ENST00000296302 | 26 | 0.612121212 | 0           |
| PBX1     | 1  | 164529060 | 164529250 | 191 | ENST00000340699 | 1  | 0.617801047 | 1.65026178  |
| PCM1     | 8  | 17847368  | 17847488  | 121 | ENST00000325083 | 25 | 0.347107438 | 1.251239669 |
| PDE4DIP  | 1  | 145014068 | 145014313 | 246 | ENST00000493130 | 4  | 0.483739837 | 0.123577236 |
| PDPK1    | 16 | 2588620   | 2588763   | 144 | ENST00000492021 | 2  | 0.597222222 | 0.039583333 |
| PER1     | 17 | 8047390   | 8047586   | 197 | ENST00000583559 | 3  | 0.588832487 | 0.605076142 |
| PER1     | 17 | 8047902   | 8048029   | 128 | ENST00000354903 | 18 | 0.609375    | 1.7265625   |
| PIM3     | 22 | 50355090  | 50355271  | 182 | ENST00000360612 | 4  | 0.752747253 | 1.158241758 |
| PINK1    | 1  | 20960042  | 20960241  | 200 | ENST00000321556 | 1  | 0.785       | 0.813       |
| PKDCC    | 2  | 42275340  | 42275811  | 472 | ENST00000294964 | 1  | 0.800847458 | 0.402542373 |
| PKMYT1   | 16 | 3018318   | 3018516   | 199 | ENST00000431515 | 9  | 0.497487437 | 0.179396985 |
| PKMYT1   | 16 | 3022636   | 3022755   | 120 | ENST00000431515 | 8  | 0.641666667 | 0.055833333 |
| PKMYT1   | 16 | 3025983   | 3026090   | 108 | ENST00000574415 | 3  | 0.648148148 | 0.861111111 |
| PKN1     | 19 | 14581914  | 14582238  | 325 | ENST00000592960 | 2  | 0.603076923 | 0.121230769 |
| PKN1     | 19 | 14552152  | 14552255  | 104 | ENST00000242783 | 2  | 0.740384615 | 1.976923077 |
| PLK3     | 1  | 45266136  | 45266345  | 210 | ENST00000372201 | 1  | 0.747619048 | 1.483333333 |
| PPP2R1A  | 19 | 52693350  | 52693547  | 198 | ENST00000454220 | 1  | 0.686868687 | 1.216666667 |
| PPP2R1A  | 19 | 52694298  | 52694420  | 123 | ENST00000477989 | 2  | 0.617886179 | 0.082926829 |
| PRKACA   | 19 | 14203389  | 14203655  | 267 | ENST00000590853 | 3  | 0.524344569 | 0.11835206  |
| PRKCH    | 14 | 61793711  | 61793899  | 189 | ENST00000553830 | 1  | 0.587301587 | 0.029100529 |
| PRKCZ    | 1  | 2013760   | 2013899   | 140 | ENST00000481140 | 1  | 0.435714286 | 0           |
| PRKDC    | 8  | 48872533  | 48872686  | 154 | ENST00000314191 | 1  | 0.714285714 | 1.922727273 |
| PRKX     | X  | 3631129   | 3631294   | 166 | ENST00000262848 | 1  | 0.759036145 | 1.944578313 |
| PTK2     | 8  | 141672747 | 141672914 | 168 | ENST00000522950 | 1  | 0.43452381  | 0           |

|         |    |           |           |     |                 |    |             |             |
|---------|----|-----------|-----------|-----|-----------------|----|-------------|-------------|
| PTK2    | 8  | 141930913 | 141931012 | 100 | ENST00000517887 | 1  | 0.5         | 0.046       |
| PTK7    | 6  | 43100447  | 43100577  | 131 | ENST00000471863 | 7  | 0.580152672 | 1.598473282 |
| PTK7    | 6  | 43044622  | 43044724  | 103 | ENST00000481273 | 1  | 0.631067961 | 0.081553398 |
| PTPRC   | 1  | 198663147 | 198663310 | 164 | ENST00000413409 | 3  | 0.524390244 | 0           |
| PXK     | 3  | 58318716  | 58318817  | 102 | ENST00000302779 | 1  | 0.666666667 | 0.790196078 |
| RABEP1  | 17 | 5187179   | 5187364   | 186 | ENST00000575991 | 2  | 0.456989247 | 0.040860215 |
| RAD51B  | 14 | 69077723  | 69077964  | 242 | ENST00000487861 | 10 | 0.512396694 | 0.069834711 |
| RALGDS  | 9  | 135996359 | 135996541 | 183 | ENST00000372047 | 1  | 0.759562842 | 0.445901639 |
| RALGDS  | 9  | 136006339 | 136006470 | 132 | ENST00000372062 | 1  | 0.681818182 | 0.188636364 |
| RARA    | 17 | 38497749  | 38497867  | 119 | ENST00000394086 | 1  | 0.806722689 | 1.139495798 |
| RB1     | 13 | 48878049  | 48878185  | 137 | ENST00000267163 | 1  | 0.759124088 | 0.416058394 |
| RIOK2   | 5  | 96501971  | 96502075  | 105 | ENST00000511293 | 2  | 0.380952381 | 0           |
| RMI2    | 16 | 11439329  | 11439477  | 149 | ENST00000312499 | 1  | 0.805369128 | 0.714765101 |
| RMI2    | 16 | 11410636  | 11410741  | 106 | ENST00000381820 | 1  | 0.58490566  | 0.010377358 |
| RNF213  | 17 | 78313001  | 78313800  | 800 | ENST00000508628 | 26 | 0.58875     | 0.306875    |
| RNF213  | 17 | 78305806  | 78306431  | 626 | ENST00000456466 | 20 | 0.49201278  | 0.003514377 |
| RNF213  | 17 | 78309961  | 78310304  | 344 | ENST00000456466 | 22 | 0.505813953 | 0.104360465 |
| RNF213  | 17 | 78301616  | 78301789  | 174 | ENST00000456466 | 18 | 0.448275862 | 0.122413793 |
| RNF213  | 17 | 78298830  | 78298998  | 169 | ENST00000456466 | 17 | 0.473372781 | 0           |
| RNF213  | 17 | 78307905  | 78308070  | 166 | ENST00000456466 | 21 | 0.578313253 | 0           |
| RNF213  | 17 | 78311633  | 78311797  | 165 | ENST00000508628 | 25 | 0.503030303 | 0           |
| RNF213  | 17 | 78302128  | 78302277  | 150 | ENST00000456466 | 19 | 0.433333333 | 0           |
| RNF213  | 17 | 78252563  | 78252709  | 147 | ENST00000508628 | 3  | 0.551020408 | 0.119047619 |
| RNF213  | 17 | 78311386  | 78311526  | 141 | ENST00000508628 | 24 | 0.553191489 | 0           |
| RNF43   | 17 | 56434527  | 56434648  | 122 | ENST00000581868 | 6  | 0.590163934 | 1.582786885 |
| RPN1    | 3  | 128369383 | 128369482 | 100 | ENST00000296255 | 1  | 0.72        | 2.196       |
| RPS6KA1 | 1  | 26857236  | 26857343  | 108 | ENST00000525525 | 2  | 0.601851852 | 0           |
| RPS6KA1 | 1  | 26870566  | 26870669  | 104 | ENST00000366866 | 2  | 0.615384615 | 0.320192308 |
| RPS6KA4 | 11 | 64127635  | 64127834  | 200 | ENST00000294261 | 3  | 0.69        | 1.986       |
| RPS6KA5 | 14 | 91518667  | 91518806  | 140 | ENST00000556594 | 2  | 0.571428571 | 0           |
| RUNX1   | 21 | 36164526  | 36164654  | 129 | ENST00000300305 | 8  | 0.744186047 | 3.363565891 |
| RUNX1T1 | 8  | 93107575  | 93107695  | 121 | ENST00000436581 | 1  | 0.561983471 | 0.343801653 |
| RYK     | 3  | 133969267 | 133969437 | 171 | ENST00000460933 | 1  | 0.777777778 | 1.397660819 |
| RYK     | 3  | 133969267 | 133969435 | 169 | ENST00000296084 | 2  | 0.781065089 | 1.413017751 |
| SBK1    | 16 | 28331942  | 28332168  | 227 | ENST00000341901 | 3  | 0.823788546 | 0.742731278 |
| SBK2    | 19 | 56041384  | 56041690  | 307 | ENST00000344158 | 3  | 0.755700326 | 1.143322476 |
| SDHAF2  | 11 | 61204233  | 61204394  | 162 | ENST00000536250 | 2  | 0.487654321 | 0.058024691 |
| SDHD    | 11 | 111963804 | 111963921 | 118 | ENST00000526592 | 4  | 0.584745763 | 0           |
| SEPT5   | 22 | 19704801  | 19704968  | 168 | ENST00000431124 | 1  | 0.660714286 | 0.173809524 |
| SETBP1  | 18 | 42456530  | 42456718  | 189 | ENST00000426838 | 3  | 0.502645503 | 0           |
| SETBP1  | 18 | 42643402  | 42643518  | 117 | ENST00000282030 | 5  | 0.820512821 | 1.577777778 |

|         |    |           |           |      |                 |    |             |             |
|---------|----|-----------|-----------|------|-----------------|----|-------------|-------------|
| SETD2   | 3  | 47164734  | 47166038  | 1305 | ENST00000409792 | 3  | 0.417624521 | 0.185900383 |
| SFPQ    | 1  | 35657823  | 35658272  | 450  | ENST00000357214 | 1  | 0.784444444 | 0.865777778 |
| SGK494  | 17 | 26937496  | 26937717  | 222  | ENST00000301037 | 12 | 0.540540541 | 0           |
| SGK494  | 17 | 26938161  | 26938271  | 111  | ENST00000301037 | 11 | 0.540540541 | 0.387387387 |
| SH2B3   | 12 | 111856125 | 111856337 | 213  | ENST00000341259 | 1  | 0.779342723 | 1.604694836 |
| SH2B3   | 12 | 111872672 | 111872835 | 164  | ENST00000551001 | 1  | 0.615853659 | 0.046341463 |
| SH2B3   | 12 | 111856531 | 111856681 | 151  | ENST00000341259 | 1  | 0.761589404 | 1.433774834 |
| SH2B3   | 12 | 111872706 | 111872831 | 126  | ENST00000538307 | 1  | 0.611111111 | 0.06031746  |
| SIK3    | 11 | 116738662 | 116738805 | 144  | ENST00000445177 | 15 | 0.5625      | 0.085416667 |
| SIK3    | 11 | 116820849 | 116820972 | 124  | ENST00000415541 | 4  | 0.524193548 | 0           |
| SIK3    | 11 | 116969010 | 116969131 | 122  | ENST00000375300 | 1  | 0.868852459 | 0.450819672 |
| SMARCA4 | 19 | 11097142  | 11097269  | 128  | ENST00000344626 | 3  | 0.7109375   | 1.859375    |
| SMG1    | 16 | 18875324  | 18875466  | 143  | ENST00000389467 | 24 | 0.51048951  | 1.439160839 |
| SMO     | 7  | 128828993 | 128829323 | 331  | ENST00000249373 | 1  | 0.773413897 | 0.520845921 |
| SOCS1   | 16 | 11349145  | 11349335  | 191  | ENST00000332029 | 1  | 0.717277487 | 2.610471204 |
| SPEG    | 2  | 220313131 | 220313683 | 553  | ENST00000312358 | 4  | 0.763110307 | 1.149728752 |
| SPEG    | 2  | 220349351 | 220349794 | 444  | ENST00000312358 | 30 | 0.754504505 | 1.662162162 |
| SPEG    | 2  | 220361531 | 220361838 | 308  | ENST00000412982 | 5  | 0.655844156 | 0.05487013  |
| SPEG    | 2  | 220299739 | 220300036 | 298  | ENST00000312358 | 1  | 0.771812081 | 1.633557047 |
| SPEG    | 2  | 220313718 | 220313993 | 276  | ENST00000312358 | 4  | 0.757246377 | 1.286231884 |
| SPEG    | 2  | 220348190 | 220348350 | 161  | ENST00000312358 | 30 | 0.813664596 | 1.947826087 |
| SPEG    | 2  | 220362442 | 220362583 | 142  | ENST00000412982 | 6  | 0.61971831  | 0.10915493  |
| SPEG    | 2  | 220362773 | 220362911 | 139  | ENST00000412982 | 7  | 0.64028777  | 0.194244604 |
| SPEG    | 2  | 220361077 | 220361204 | 128  | ENST00000412982 | 4  | 0.5859375   | 0.09921875  |
| SRC     | 20 | 36012700  | 36012806  | 107  | ENST00000358208 | 1  | 0.775700935 | 2.239252336 |
| SRPK1   | 6  | 35887842  | 35888031  | 190  | ENST00000507909 | 1  | 0.578947368 | 1.371578947 |
| SRPK1   | 6  | 35858672  | 35858818  | 147  | ENST00000512445 | 2  | 0.43537415  | 2.310884354 |
| SRPK2   | 7  | 104946883 | 104947018 | 136  | ENST00000465112 | 3  | 0.426470588 | 0           |
| SRPK2   | 7  | 105029691 | 105029817 | 127  | ENST00000482897 | 1  | 0.708661417 | 0.091338583 |
| SRPK3   | X  | 153045681 | 153045940 | 260  | ENST00000489426 | 1  | 0.642307692 | 0.000769231 |
| SS18    | 18 | 23661191  | 23661329  | 139  | ENST00000582792 | 3  | 0.532374101 | 0           |
| SS18    | 18 | 23660279  | 23660387  | 109  | ENST00000585121 | 3  | 0.412844037 | 0           |
| SS18L1  | 20 | 60739201  | 60739302  | 102  | ENST00000331758 | 7  | 0.666666667 | 1.328431373 |
| SSX2    | X  | 52727836  | 52727981  | 146  | ENST00000336777 | 6  | 0.479452055 | 0           |
| STK11   | 19 | 1227592   | 1227856   | 265  | ENST00000586243 | 5  | 0.777358491 | 0.107924528 |
| STK17A  | 7  | 43622936  | 43623048  | 113  | ENST00000319357 | 1  | 0.778761062 | 2.25840708  |
| STK3    | 8  | 99895875  | 99895984  | 110  | ENST00000523601 | 1  | 0.445454545 | 0.037272727 |
| STK35   | 20 | 2082528   | 2082821   | 294  | ENST00000381482 | 1  | 0.721088435 | 0           |
| STK35   | 20 | 2124430   | 2124542   | 113  | ENST00000400064 | 2  | 0.637168142 | 0.104424779 |
| STK39   | 2  | 169103738 | 169103881 | 144  | ENST00000355999 | 1  | 0.826388889 | 0.500694444 |
| SUZ12   | 17 | 30264266  | 30264539  | 274  | ENST00000322652 | 1  | 0.726277372 | 1.096350365 |

|          |    |           |           |      |                 |     |             |             |
|----------|----|-----------|-----------|------|-----------------|-----|-------------|-------------|
| TAF1     | X  | 70748392  | 70748575  | 184  | ENST00000437147 | 15  | 0.505434783 | 0.132608696 |
| TAL1     | 1  | 47691115  | 47691383  | 269  | ENST00000294339 | 1   | 0.791821561 | 0.27732342  |
| TAOK2    | 16 | 30002766  | 30002889  | 124  | ENST00000279394 | 18  | 0.653225806 | 2.189516129 |
| TBCK     | 4  | 107183255 | 107183369 | 115  | ENST00000273980 | 3   | 0.417391304 | 0           |
| TBCK     | 4  | 107172238 | 107172351 | 114  | ENST00000503832 | 2   | 0.342105263 | 0.020175439 |
| TERT     | 5  | 1294913   | 1295104   | 192  | ENST00000296820 | 1   | 0.78125     | 0.7015625   |
| TERT     | 5  | 1293919   | 1294040   | 122  | ENST00000296820 | 2   | 0.647540984 | 3.021311475 |
| TET2     | 4  | 106196205 | 106197676 | 1472 | ENST00000380013 | 9   | 0.47486413  | 0.109375    |
| TET2     | 4  | 106193721 | 106194075 | 355  | ENST00000380013 | 8   | 0.45915493  | 0           |
| TET2     | 4  | 106164727 | 106164935 | 209  | ENST00000380013 | 4   | 0.555023923 | 0.008133971 |
| TET2     | 4  | 106180776 | 106180926 | 151  | ENST00000380013 | 5   | 0.490066225 | 0.065562914 |
| TET2     | 4  | 106190767 | 106190904 | 138  | ENST00000380013 | 7   | 0.514492754 | 0.044202899 |
| TFEB     | 6  | 41659011  | 41659209  | 199  | ENST00000343317 | 1   | 0.537688442 | 1.104020101 |
| TLX1     | 10 | 102891505 | 102891667 | 163  | ENST00000370196 | 1   | 0.766871166 | 1.567484663 |
| TNFRSF17 | 16 | 12060877  | 12061000  | 124  | ENST00000562385 | 3   | 0.548387097 | 0           |
| TNIK     | 3  | 170943323 | 170943424 | 102  | ENST00000468757 | 1   | 0.411764706 | 0           |
| TNK1     | 17 | 7292290   | 7292403   | 114  | ENST00000311668 | 12  | 0.614035088 | 3.003508772 |
| TNK1     | 17 | 7287465   | 7287572   | 108  | ENST00000311668 | 5   | 0.75        | 2.385185185 |
| TNK1     | 17 | 7287289   | 7287391   | 103  | ENST00000311668 | 5   | 0.747572816 | 2.851456311 |
| TNK2     | 3  | 195622924 | 195623097 | 174  | ENST00000427576 | 1   | 0.695402299 | 0           |
| TNK2     | 3  | 195603482 | 195603607 | 126  | ENST00000411741 | 1   | 0.706349206 | 0.35952381  |
| TNNI3K   | 1  | 74867523  | 74867641  | 119  | ENST00000534020 | 4   | 0.43697479  | 0           |
| TP53RK   | 20 | 45317766  | 45317908  | 143  | ENST00000372102 | 1   | 0.755244755 | 1.611888112 |
| TPM4     | 19 | 16187376  | 16187507  | 132  | ENST00000300933 | 1   | 0.712121212 | 1.508333333 |
| TPM4     | 19 | 16191763  | 16191885  | 123  | ENST00000588410 | 1   | 0.520325203 | 0.06097561  |
| TRIB1    | 8  | 126443145 | 126443504 | 360  | ENST00000311922 | 1   | 0.769444444 | 1.09        |
| TRIM28   | 19 | 59056125  | 59056464  | 340  | ENST00000253024 | 1   | 0.791176471 | 0.130588235 |
| TRIM33   | 1  | 115053298 | 115053697 | 400  | ENST00000358465 | 1   | 0.7625      | 0.893       |
| TRIO     | 5  | 14143835  | 14143991  | 157  | ENST00000344204 | 1   | 0.808917197 | 0.068789809 |
| TTBK1    | 6  | 43252721  | 43253114  | 394  | ENST00000259750 | 14  | 0.766497462 | 1.783248731 |
| TTN      | 2  | 179560592 | 179560879 | 288  | ENST00000342992 | 110 | 0.402777778 | 0.998958333 |
| TWF1     | 12 | 44199846  | 44200048  | 203  | ENST00000547459 | 1   | 0.753694581 | 1.840394089 |
| TWF1     | 12 | 44200024  | 44200150  | 127  | ENST00000325127 | 1   | 0.771653543 | 1.871653543 |
| TWF1     | 12 | 44199327  | 44199440  | 114  | ENST00000546662 | 2   | 0.438596491 | 1.154385965 |
| TYK2     | 19 | 10468140  | 10468367  | 228  | ENST00000529370 | 15  | 0.561403509 | 0.761403509 |
| TYK2     | 19 | 10480433  | 10480553  | 121  | ENST00000530829 | 2   | 0.58677686  | 0           |
| TYK2     | 19 | 10473234  | 10473333  | 100  | ENST00000264818 | 8   | 0.65        | 2.371       |
| TYRO3    | 15 | 41851456  | 41851579  | 124  | ENST00000263798 | 1   | 0.790322581 | 0.139516129 |
| ULK1     | 12 | 132406286 | 132406728 | 443  | ENST00000542419 | 2   | 0.566591422 | 0.322573363 |
| ULK2     | 17 | 19764255  | 19764368  | 114  | ENST00000580118 | 2   | 0.535087719 | 0           |
| ULK3     | 15 | 75135345  | 75135446  | 102  | ENST00000440863 | 1   | 0.725490196 | 1.844117647 |

|       |    |          |          |     |                 |   |             |             |
|-------|----|----------|----------|-----|-----------------|---|-------------|-------------|
| VHL   | 3  | 10183532 | 10183646 | 115 | ENST00000256474 | 1 | 0.713043478 | 1.174782609 |
| WEE1  | 11 | 9595481  | 9595830  | 350 | ENST00000450114 | 1 | 0.762857143 | 1.895714286 |
| WEE1  | 11 | 9595907  | 9596056  | 150 | ENST00000450114 | 1 | 0.773333333 | 0.670666667 |
| WNK1  | 12 | 974276   | 974530   | 255 | ENST00000530271 | 9 | 0.568627451 | 0.103529412 |
| WNK2  | 9  | 95947212 | 95947618 | 407 | ENST00000297954 | 1 | 0.805896806 | 0.23022113  |
| WT1   | 11 | 32456507 | 32456786 | 280 | ENST00000332351 | 1 | 0.771428571 | 1.749642857 |
| ZRSR2 | X  | 15819397 | 15819637 | 241 | ENST00000380308 | 4 | 0.543568465 | 0           |

## Supplementary Table 3

New mutations detected by CRUK Manchester Institute sequencing that were not reported by either CCLE or COSMIC

Cell line

**H2122**

| Gene     | Mutation | %GC  |
|----------|----------|------|
| DSTYK    | p.G9S    | 0.75 |
| GLI3     | p.P940T  | 0.7  |
| KIAA1549 | p.T503M  | 0.47 |
| MKL1     | p.P391L  | 0.65 |
| TTN      | p.E4839G | 0.45 |

**H2087**

|        |          |      |
|--------|----------|------|
| AATK   | p.L97V   | 0.69 |
| BCL11B | p.R229L  | 0.74 |
| CDK7   | p.A2V    | 0.6  |
| EIF4G1 | p.A1389V | 0.58 |
| GATA2  | p.P125T  | 0.67 |
| PGR    | p.W473C  | 0.29 |
| SIRT1  | p.P37L   | 0.8  |
| TBX22  | p.T64R   | 0.56 |

**H2009**

|         |          |      |
|---------|----------|------|
| AXL     | p.S511R  | 0.58 |
| EGFR    | p.N650S  | 0.48 |
| F12     | p.L260Q  | 0.73 |
| FLNC    | p.T1406N | 0.54 |
| MN1     | p.G671A  | 0.75 |
| PAK4    | p.E119Q  | 0.76 |
| PRKD1   | p.L7P    | 0.83 |
| RUNX1T1 | p.V61F   | 0.46 |

**H1437**

|         |          |      |
|---------|----------|------|
| APBB1IP | p.P600T  | 0.86 |
| CASC5   | p.P1900L | 0.4  |
| DCLK1   | p.P429H  | 0.5  |
| MAX     | p.T72S   | 0.38 |
| MLLT1   | p.D492N  | 0.65 |
| RECQL4  | p.E711K  | 0.56 |

## Supplemental Table 4

Proportion of missense mutations exclusively reported by one institute (CCLE or COSMIC) that were subsequently found by CRUK MI sequencing.

|                                                    | <b>H2009</b> | <b>H2087</b> | <b>H1437</b> | <b>H2122</b> | <b>Total</b> | <b>%</b> |
|----------------------------------------------------|--------------|--------------|--------------|--------------|--------------|----------|
| <b>Exclusive mutations detected by CRUK MI</b>     | 25           | 37           | 13           | 13           | 88           | 72.13    |
| <b>Exclusive mutations NOT detected by CRUK MI</b> | 6            | 10           | 11           | 7            | 34           | 27.87    |



## Supplementary Table 5:

Sequencing statistics for CRUK MI sequencing. Average read depth calculated using the Lander / Waterman equation.

| <b>Sample</b> | <b>totalReads</b> | <b>Mapped Reads</b> |        | <b>Average Read Depth</b> | <b>Unmapped Reads</b> |       |
|---------------|-------------------|---------------------|--------|---------------------------|-----------------------|-------|
| H2009         | 73410860          | 72432478            | 98.67% | 142x                      | 80531                 | 0.11% |
| H1437         | 88063156          | 86823722            | 98.59% | 170x                      | 142014                | 0.16% |
| H2122         | 65234672          | 64126504            | 98.30% | 126x                      | 165621                | 0.25% |
| H2087         | 67953460          | 66863736            | 98.40% | 131x                      | 189300                | 0.28% |

  

|                                             |       |
|---------------------------------------------|-------|
| Read Length                                 | 100bp |
| SureSelect XT Human All Exon V4 Target Size | 51Mb  |

## Supplementary Table 6

List of kinase and Cancer Census genes that were analysed to identify sequencing cold-spots in 10 CCLE whole exome sequencing files

|          |          |          |          |
|----------|----------|----------|----------|
| AAK1     | AURKC    | CAMKV    | CDK9     |
| AATK     | AXIN1    | CAMTA1   | CDKL1    |
| ABI1     | AXL      | CANT1    | CDKL2    |
| ABL1     | BAP1     | CARD11   | CDKL3    |
| ABL2     | BCKDK    | CARS     | CDKL4    |
| ACSL3    | BCL10    | CASC5    | CDKL5    |
| ACSL6    | BCL11A   | CASK     | CDKN2A   |
| ACVR1    | BCL11B   | CBFA2T3  | CDKN2C   |
| ACVR1B   | BCL2     | CBFB     | CDX2     |
| ACVR1C   | BCL3     | CBL      | CEBPA    |
| ACVR2A   | BCL6     | CBLB     | CHCHD7   |
| ACVR2B   | BCL7A    | CBLC     | CHEK1    |
| ACVRL1   | BCL9     | CCDC6    | CHEK2    |
| ADCK1    | BCOR     | CCNB1IP1 | CHIC2    |
| ADCK2    | BCR      | CCND1    | CHN1     |
| ADCK3    | BIRC3    | CCND2    | CHUK     |
| ADCK4    | BLK      | CCND3    | CIC      |
| ADCK5    | BLM      | CCNE1    | CIITA    |
| ADRBK1   | BMP2K    | CD274    | CIT      |
| ADRBK2   | BMPR1A   | CD74     | CLK1     |
| AFF1     | BMPR1B   | CD79A    | CLK2     |
| AFF3     | BMPR2    | CD79B    | CLK3     |
| AFF4     | BMX      | CD8A     | CLK4     |
| AKAP9    | BRAF     | CDC42BPA | CLP1     |
| AKT1     | BRCA1    | CDC42BPB | CLTC     |
| AKT2     | BRCA2    | CDC42BPG | CLTCL1   |
| AKT3     | BRD2     | CDC42EP1 | CNBP     |
| ALDH2    | BRD3     | CDC7     | CNOT3    |
| ALK      | BRD4     | CDC73    | COL1A1   |
| ALPK1    | BRDT     | CDH1     | COX6C    |
| ALPK2    | BRIP1    | CDH11    | CREB1    |
| ALPK3    | BRSK1    | CDK1     | CREB3L1  |
| AMHR2    | BRSK2    | CDK10    | CREB3L2  |
| ANKK1    | BTG1     | CDK11B   | CREBBP   |
| APC      | BTK      | CDK12    | CRLF2    |
| ARAF     | BUB1     | CDK13    | CRTC1    |
| ARHGAP26 | BUB1B    | CDK14    | CRTC3    |
| ARHGEF12 | C15orf55 | CDK15    | CSF1R    |
| ARID1A   | C2orf44  | CDK16    | CSF3R    |
| ARID2    | C9orf96  | CDK17    | CSK      |
| ARNT     | CAMK1    | CDK18    | CSNK1A1  |
| ASPSCR1  | CAMK1D   | CDK19    | CSNK1A1L |
| ASXL1    | CAMK1G   | CDK2     | CSNK1D   |
| ATF1     | CAMK2A   | CDK20    | CSNK1E   |
| ATIC     | CAMK2B   | CDK3     | CSNK1G1  |
| ATM      | CAMK2D   | CDK4     | CSNK1G2  |
| ATR      | CAMK2G   | CDK5     | CSNK1G3  |
| ATRX     | CAMK4    | CDK6     | CSNK2A1  |
| AURKA    | CAMKK1   | CDK7     | CSNK2A2  |
| AURKB    | CAMKK2   | CDK8     | CTNNB1   |

|         |         |         |           |
|---------|---------|---------|-----------|
| CXCR7   | EPHA7   | FGFR3   | HIP1      |
| CYLD    | EPHA8   | FGFR4   | HIPK1     |
| DAPK1   | EPHB1   | FGR     | HIPK2     |
| DAPK2   | EPHB2   | FH      | HIPK3     |
| DAPK3   | EPHB3   | FHIT    | HIPK4     |
| DAXX    | EPHB4   | FIP1L1  | HIST1H3B  |
| DCLK1   | EPHB6   | FLCN    | HIST1H4I  |
| DCLK2   | EPS15   | FLI1    | HLF       |
| DCLK3   | ERBB2   | FLT1    | HMGA1     |
| DDB2    | ERBB3   | FLT3    | HMGA2     |
| DDIT3   | ERBB4   | FLT4    | HMG2P46   |
| DDR1    | ERC1    | FNBP1   | HNF1A     |
| DDR2    | ERCC2   | FOXL2   | HNRNPA2B1 |
| DDX10   | ERCC3   | FOXO1   | HOOK3     |
| DDX5    | ERCC4   | FOXO3   | HOXA11    |
| DDX6    | ERCC5   | FOXO4   | HOXA13    |
| DEK     | ERG     | FOXP1   | HOXA9     |
| DICER1  | ERN1    | FRK     | HOXC11    |
| DMPK    | ERN2    | FSTL3   | HOXC13    |
| DNM2    | ETV1    | FUBP1   | HOXD11    |
| DNMT3A  | ETV4    | FUS     | HOXD13    |
| DSTYK   | ETV5    | FYN     | HRAS      |
| DUX4    | ETV6    | GAK     | HSP90AA1  |
| DYRK1A  | EWSR1   | GAS7    | HSP90AB1  |
| DYRK1B  | EXT1    | GATA1   | HSPB8     |
| DYRK2   | EXT2    | GATA2   | HUNK      |
| DYRK3   | EZH2    | GATA3   | ICK       |
| DYRK4   | EZR     | GMPS    | IDH1      |
| EBF1    | FAM123B | GNA11   | IDH2      |
| ECT2L   | FAM22A  | GNAQ    | IGF1R     |
| EEF2K   | FAM22B  | GNAS    | IKKBK     |
| EGFR    | FAM46C  | GOLGA5  | IKBKE     |
| EIF2AK1 | FANCA   | GOPC    | IKZF1     |
| EIF2AK2 | FANCC   | GPC3    | IL2       |
| EIF2AK3 | FANCD2  | GPHN    | IL21R     |
| EIF2AK4 | FANCE   | GRK1    | IL6ST     |
| EIF4A2  | FANCF   | GRK4    | IL7R      |
| ELF4    | FANCG   | GRK5    | ILK       |
| ELK4    | FAS     | GRK6    | INSR      |
| ELL     | FASTK   | GRK7    | INSRR     |
| ELN     | FBXO11  | GSG2    | IRAK1     |
| EML4    | FBXW7   | GSK3A   | IRAK2     |
| EP300   | FCGR2B  | GSK3B   | IRAK3     |
| EPHA1   | FCRL4   | GUCY2C  | IRAK4     |
| EPHA10  | FER     | GUCY2D  | IRF4      |
| EPHA2   | FES     | GUCY2F  | ITK       |
| EPHA3   | FEV     | H3F3A   | JAK1      |
| EPHA4   | FGFR1   | HCK     | JAK2      |
| EPHA5   | FGFR10P | HERPUD1 | JAK3      |
| EPHA6   | FGFR2   | HEY1    | JAZF1     |

|          |          |        |         |
|----------|----------|--------|---------|
| JUN      | MAP2K5   | MDM2   | MYH11   |
| KALRN    | MAP2K6   | MDM4   | MYH9    |
| KAT6A    | MAP2K7   | MDS2   | MYLK    |
| KAT6B    | MAP3K1   | MECOM  | MYLK2   |
| KCNJ5    | MAP3K10  | MED12  | MYLK3   |
| KDM5A    | MAP3K11  | MELK   | MYLK4   |
| KDM5C    | MAP3K12  | MEN1   | MYO3A   |
| KDM6A    | MAP3K13  | MERTK  | MYO3B   |
| KDR      | MAP3K15  | MET    | NACA    |
| KDSR     | MAP3K19  | MGMT   | NCKIPSD |
| KIAA1549 | MAP3K2   | MINK1  | NCOA1   |
| KIF5B    | MAP3K3   | MITF   | NCOA2   |
| KIT      | MAP3K4   | MKL1   | NCOA4   |
| KLF4     | MAP3K5   | MKNK1  | NDRG1   |
| KLF6     | MAP3K6   | MKNK2  | NEK1    |
| KLK2     | MAP3K7   | MLF1   | NEK10   |
| KRAS     | MAP3K8   | MLH1   | NEK11   |
| KSR1     | MAP3K9   | MLK4   | NEK2    |
| KSR2     | MAP4K1   | MLKL   | NEK3    |
| KTN1     | MAP4K2   | MLL    | NEK4    |
| LASP1    | MAP4K3   | MLL2   | NEK5    |
| LATS1    | MAP4K4   | MLL3   | NEK6    |
| LATS2    | MAP4K5   | MLLT1  | NEK7    |
| LCK      | MAPK1    | MLLT10 | NEK8    |
| LCP1     | MAPK10   | MLLT11 | NEK9    |
| LHFP     | MAPK11   | MLLT3  | NF1     |
| LIFR     | MAPK12   | MLLT4  | NF2     |
| LIMK1    | MAPK13   | MLLT6  | NFE2L2  |
| LIMK2    | MAPK14   | MLTK   | NFIB    |
| LMO1     | MAPK15   | MN1    | NFKB2   |
| LMO2     | MAPK3    | MNX1   | NIM1    |
| LMTK2    | MAPK4    | MOK    | NIN     |
| LMTK3    | MAPK6    | MOS    | NKX2-1  |
| LPP      | MAPK7    | MPL    | NLK     |
| LRIG3    | MAPK8    | MSH2   | NLRP2   |
| LRRK1    | MAPK9    | MSH6   | NONO    |
| LRRK2    | MAPKAPK2 | MSI2   | NOTCH1  |
| LTK      | MAPKAPK3 | MSN    | NOTCH2  |
| LYL1     | MAPKAPK5 | MST1R  | NPM1    |
| LYN      | MARK1    | MST4   | NPR1    |
| MAF      | MARK2    | MTCP1  | NPR2    |
| MAFB     | MARK3    | MTOR   | NR4A3   |
| MAK      | MARK4    | MUC1   | NRAS    |
| MALAT1   | MAST1    | MUSK   | NRBP1   |
| MALT1    | MAST2    | MUTYH  | NRBP2   |
| MAML2    | MAST3    | MYB    | NRK     |
| MAP2K1   | MAST4    | MYC    | NSD1    |
| MAP2K2   | MASTL    | MYCL1  | NT5C2   |
| MAP2K3   | MATK     | MYCN   | NTRK1   |
| MAP2K4   | MAX      | MYD88  | NTRK2   |

|          |         |          |         |
|----------|---------|----------|---------|
| NTRK3    | PIK3R1  | PRKG2    | RPS6KA1 |
| NUAK1    | PIK3R4  | PRKX     | RPS6KA2 |
| NUAK2    | PIM1    | PRPF4B   | RPS6KA3 |
| NUMA1    | PIM2    | PRRX1    | RPS6KA4 |
| NUP214   | PIM3    | PSIP1    | RPS6KA5 |
| NUP98    | PINK1   | PSKH1    | RPS6KA6 |
| OBSCN    | PKDCC   | PSKH2    | RPS6KB1 |
| OGG1     | PKMYT1  | PTCH1    | RPS6KB2 |
| OLIG2    | PKN1    | PTEN     | RPS6KC1 |
| OMD      | PKN2    | PTK2     | RPS6KL1 |
| OXR1     | PKN3    | PTK2B    | RUNX1   |
| P2RY8    | PLAG1   | PTK6     | RUNX1T1 |
| PAFAH1B2 | PLK1    | PTK7     | RYK     |
| PAK1     | PLK2    | PTPN11   | SBDS    |
| PAK2     | PLK3    | PTPRC    | SBK1    |
| PAK3     | PLK4    | PXK      | SBK2    |
| PAK4     | PML     | RABEP1   | SCYL1   |
| PAK6     | PMS1    | RAC1     | SCYL2   |
| PAK7     | PMS2    | RAD21    | SCYL3   |
| PALB2    | PNCK    | RAD51B   | SDC4    |
| PASK     | POT1    | RAF1     | SDHAF2  |
| PATZ1    | POU2AF1 | RALGDS   | SDHB    |
| PAX3     | POU5F1  | RANBP17  | SDHC    |
| PAX5     | PPARG   | RAP1GDS1 | SDHD    |
| PAX7     | PPP2R1A | RARA     | SEPT5   |
| PAX8     | PRCC    | RB1      | SEPT6   |
| PBK      | PRDM1   | RBM15    | SET     |
| PBRM1    | PRDM16  | REL      | SETBP1  |
| PBX1     | PRF1    | RET      | SETD2   |
| PCM1     | PRG4    | RHOH     | SF3B1   |
| PCSK7    | PRKAA1  | RIOK1    | SFPQ    |
| PDCD1LG2 | PRKAA2  | RIOK2    | SGK1    |
| PDE4DIP  | PRKACA  | RIOK3    | SGK2    |
| PDGFB    | PRKACB  | RIPK1    | SGK223  |
| PDGFRA   | PRKACG  | RIPK2    | SGK3    |
| PDGFRB   | PRKAR1A | RIPK3    | SGK494  |
| PDIK1L   | PRKCA   | RIPK4    | SH2B3   |
| PDK1     | PRKCB   | RMI2     | SH3GL1  |
| PDK2     | PRKCD   | RNASEL   | SIK1    |
| PDK3     | PRKCE   | RNF213   | SIK2    |
| PDK4     | PRKCG   | RNF43    | SIK3    |
| PDPK1    | PRKCH   | ROCK1    | SLC34A2 |
| PEAK1    | PRKCI   | ROCK2    | SLC45A3 |
| PER1     | PRKCQ   | ROR1     | SLK     |
| PHF6     | PRKCZ   | ROR2     | SMAD4   |
| PHKG1    | PRKD1   | ROS1     | SMARCA4 |
| PHKG2    | PRKD2   | RPL10    | SMARCB1 |
| PHOX2B   | PRKD3   | RPL22    | SMARCE1 |
| PICALM   | PRKDC   | RPL5     | SMG1    |
| PIK3CA   | PRKG1   | RPN1     | SMO     |

|        |          |         |        |
|--------|----------|---------|--------|
| SNRK   | TAF15    | TRAF7   | WNK1   |
| SNX29  | TAF1L    | TRIB1   | WNK2   |
| SOCS1  | TAL1     | TRIB2   | WNK3   |
| SOX2   | TAL2     | TRIB3   | WNK4   |
| SPECC1 | TAOK1    | TRIM24  | WRN    |
| SPEG   | TAOK2    | TRIM27  | WT1    |
| SRC    | TAOK3    | TRIM28  | WWTR1  |
| SRGAP3 | TBCK     | TRIM33  | XPA    |
| SRMS   | TBK1     | TRIO    | XPC    |
| SRPK1  | TBL1XR1  | TRIP11  | XPO1   |
| SRPK2  | TCEA1    | TRPM6   | YES1   |
| SRPK3  | TCF12    | TRPM7   | YWHAE  |
| SRSF2  | TCF3     | TRRAP   | ZAP70  |
| SRSF3  | TCF7L2   | TSC1    | ZBTB16 |
| SS18   | TCL1A    | TSC2    | ZMYM2  |
| SS18L1 | TEC      | TSHR    | ZNF331 |
| SSX1   | TEK      | TSSK1B  | ZNF384 |
| SSX2   | TERT     | TSSK2   | ZNF521 |
| SSX4   | TESK1    | TSSK3   | ZRSR2  |
| STAT3  | TESK2    | TSSK4   |        |
| STAT5B | TET1     | TSSK6   |        |
| STIL   | TET2     | TTBK1   |        |
| STK10  | TEX14    | TTBK2   |        |
| STK11  | TFE3     | TTK     |        |
| STK16  | TFEB     | TTL     |        |
| STK17A | TFG      | TTN     |        |
| STK17B | TFPT     | TWF1    |        |
| STK19  | TFRC     | TWF2    |        |
| STK24  | TGFBR1   | TXK     |        |
| STK25  | TGFBR2   | TYK2    |        |
| STK3   | THRAP3   | TYRO3   |        |
| STK31  | TIE1     | U2AF1   |        |
| STK32A | TLK1     | UBR5    |        |
| STK32B | TLK2     | UHMK1   |        |
| STK32C | TLX1     | ULK1    |        |
| STK33  | TLX3     | ULK2    |        |
| STK35  | TMPRSS2  | ULK3    |        |
| STK36  | TNFAIP3  | ULK4    |        |
| STK38  | TNFRSF14 | USP6    |        |
| STK38L | TNFRSF17 | VHL     |        |
| STK39  | TNIK     | VRK1    |        |
| STK4   | TNK1     | VRK2    |        |
| STK40  | TNK2     | VRK3    |        |
| STRADA | TNNI3K   | VTI1A   |        |
| STRADB | TOP1     | WAS     |        |
| STYK1  | TP53     | WEE1    |        |
| SUFU   | TP53RK   | WEE2    |        |
| SUZ12  | TPM3     | WHSC1   |        |
| SYK    | TPM4     | WHSC1L1 |        |
| TAF1   | TPR      | WIF1    |        |

## Supplementary Table 7: Read coverage in CCLE Hybrid Capture at midpoint of 20 largest coldspots

Read coverage in CCLE Hybrid Capture data at the midpoint of 20 largest cold-spots identified in CCLE 10 lung whole exome sequencing files (not hybrid capture).

| Cold-spot | Chr | Start     | End       | Coldspot midpoint location | DMS153 | H2286 | DV90 | H1944 | Cell line (number of reads) |       |       |       |     |       |
|-----------|-----|-----------|-----------|----------------------------|--------|-------|------|-------|-----------------------------|-------|-------|-------|-----|-------|
|           |     |           |           |                            |        |       |      |       | CORL95                      | H1373 | H1184 | HLF-A | JL1 | HCC78 |
| TET2      | 4   | 106196205 | 106197676 | 4:106196941                | 0      | 0     | 1    | 0     | 0                           | 0     | 0     | n/a   | 0   | 0     |
| CDK13     | 7   | 39990241  | 39991058  | 7:39990650                 | 0      | 1     | 1    | 0     | 1                           | 0     | 0     | n/a   | 0   | 1     |
| CEBPA     | 19  | 33792559  | 33793320  | 19:33792940                | 0      | 0     | 0    | 0     | 0                           | 0     | 0     | n/a   | 0   | 0     |
| LMTK3     | 19  | 49002459  | 49003076  | 19:49002768                | 0      | 0     | 0    | 0     | 0                           | 0     | 0     | n/a   | 0   | 1     |
| SPEG      | 2   | 220313131 | 220313683 | 2:220313407                | 0      | 4     | 0    | 2     | 0                           | 2     | 0     | n/a   | 0   | 0     |
| HOXD11    | 2   | 176972336 | 176972864 | 2:176972600                | 0      | 0     | 0    | 0     | 0                           | 0     | 0     | n/a   | 0   | 0     |
| ARID1A    | 1   | 27022895  | 27023383  | 1:27023139                 | 0      | 0     | 0    | 0     | 0                           | 0     | 0     | n/a   | 0   | 0     |
| MAP3K1    | 5   | 56111401  | 56111882  | 5:56111642                 | 0      | 0     | 0    | 0     | 0                           | 1     | 0     | n/a   | 0   | 0     |
| AATK      | 17  | 79095991  | 79096471  | 17:79096231                | 0      | 0     | 0    | 0     | 0                           | 0     | 0     | n/a   | 0   | 0     |
| GUCY2D    | 17  | 7906366   | 7906836   | 17:7906601                 | 1      | 0     | 0    | 0     | 0                           | 2     | 0     | n/a   | 0   | 1     |
| OLIG2     | 21  | 34399683  | 34400142  | 21:34399913                | 0      | 0     | 0    | 0     | 0                           | 0     | 0     | n/a   | 0   | 0     |
| SFPQ      | 1   | 35657823  | 35658272  | 1:35658048                 | 0      | 0     | 1    | 0     | 0                           | 0     | 0     | n/a   | 0   | 0     |
| CLK3      | 15  | 74907796  | 74908239  | 15:74908018                | 0      | 0     | 0    | 0     | 0                           | 0     | 0     | n/a   | 0   | 0     |
| SPEG      | 2   | 220349351 | 220349794 | 2:220349573                | 0      | 3     | 0    | 0     | 0                           | 0     | 0     | n/a   | 2   | 1     |
| FOXO1     | 13  | 41239919  | 41240349  | 13:41240134                | 0      | 0     | 0    | 0     | 0                           | 0     | 0     | n/a   | 0   | 0     |
| ALPK3     | 15  | 85360412  | 85360826  | 15:85360619                | 0      | 0     | 0    | 0     | 0                           | 0     | 0     | n/a   | 0   | 0     |
| WNK2      | 9   | 95947212  | 95947618  | 9:95947415                 | 0      | 0     | 0    | 0     | 0                           | 0     | 0     | n/a   | 0   | 0     |
| MNX1      | 7   | 156802516 | 156802919 | 7:156802718                | 0      | 0     | 0    | 0     | 0                           | 0     | 0     | n/a   | 0   | 0     |
| TRIM33    | 1   | 115053298 | 115053697 | 1:115053498                | 1      | 2     | 2    | 0     | 0                           | 0     | 0     | n/a   | 0   | 1     |
| TTBK1     | 6   | 43252721  | 43253114  | 6:43252918                 | 0      | 0     | 0    | 1     | 0                           | 0     | 0     | n/a   | 0   | 0     |

HLF-A hybrid capture read data not available
